# Supplementary material for: The Cytotoxic Activity of Dammarane-Type Triterpenoids Isolated from the Stem Bark of Aglaia cucullata (Meliaceae)
Source: MDPI journal article supplement (doi:10.3390/molecules28134946), 2023-06-23

## Supplementary Material

### **Cytotoxic Activity of Dammarane-Type Triterpenoids from the Stem Bark of *Aglaia cucullata* (Meliaceae)**

Purnama <sup>1</sup>, Kindi Farabi <sup>1,3</sup>, Dudi Runadi <sup>1</sup>, Hadi Kuncoro <sup>2</sup>, Desi Harneti <sup>1</sup>, Nurlelasari <sup>1</sup>, Tri Mayanti <sup>1</sup>, Mohamad Nurul Azmi <sup>4</sup>, Sofa Fajriah <sup>5</sup>, Unang Supratman <sup>1,3,\*</sup>

<sup>1</sup>Department of Chemistry, Faculty of Mathematics and Natural Sciences, Universitas Padjadjaran, Jatinangor, 45363, Indonesia

<sup>2</sup>Faculty of Pharmacy, Universitas Mulawarman, Samarinda, 75123, East Kalimantan, Indonesia

<sup>3</sup>Central Laboratory, Universitas Padjadjaran, Jatinangor, 45363, Indonesia.

<sup>4</sup>School of Chemical Sciences, Universiti Sains Malaysia, 11800 Minden, Penang, Malaysia

<sup>5</sup>Research Center for Pharmaceutical Ingredients and Traditional Medicine, National Research and Innovation Agency (BRIN), Complex Cibinong Science Center – BRIN., Cibinong 16911, Bogor, Jawa Barat, Indonesia

\* Correspondence: unang.supratman@unpad.ac.id; Tel.: +62 22 7794391

## Contents

**Figure S1.** HRTOFMS Spectrum of **1**.

**Figure S2.** FTIR Spectrum of **1**.

**Figure S3.**  $^1\text{H}$ -NMR Spectrum of **1** (500 MHz in  $\text{CDCl}_3$ ).

**Figure S4.**  $^{13}\text{C}$ -NMR and DEPT-135° Spectrum of **1** (125 MHz in  $\text{CDCl}_3$ ).

**Figure S5.** HMQC Spectrum of **1**.

**Figure S6.** HMBC Spectrum of **1**.

**Figure S7.**  $^1\text{H}$ - $^1\text{H}$ -COSY Spectrum of **1**.

**Figure S8.** HRTOFMS Spectrum of **2**.

**Figure S9.** FTIR Spectrum of **2**.

**Figure S10.**  $^1\text{H}$ -NMR Spectrum of **2** (500 MHz in  $\text{CDCl}_3$ ).

**Figure S11.**  $^{13}\text{C}$ -NMR and DEPT-135° Spectrum of **2** (125 MHz in  $\text{CDCl}_3$ ).

**Figure S12.** HRTOFMS Spectrum of **3**.

**Figure S13.** FTIR Spectrum of **3**.

**Figure S14.**  $^1\text{H}$ -NMR Spectrum of **3** (500 MHz in  $\text{CDCl}_3$ ).

**Figure S15.**  $^{13}\text{C}$ -NMR and DEPT-135° Spectrum of **3** (125 MHz in  $\text{CDCl}_3$ ).

**Figure S16.** HRTOFMS Spectrum of **4**.

**Figure S17.** FTIR Spectrum of **4**.

**Figure S18.**  $^1\text{H}$ -NMR Spectrum of **4** (500 MHz in  $\text{CDCl}_3$ ).

**Figure S19.**  $^{13}\text{C}$ -NMR and DEPT-135° Spectrum of **4** (125 MHz in  $\text{CDCl}_3$ ).

**Figure S20.** HMQC Spectrum of **4**.

**Figure S21.** HMBC Spectrum of **4**.

**Figure S22.**  $^1\text{H}$ - $^1\text{H}$ -COSY Spectrum of **4**.

**Figure S23.** HRTOFMS Spectrum of **5**.

**Figure S24.** FTIR Spectrum of **5**.

**Figure S25.**  $^1\text{H}$ -NMR Spectrum of **5** (500 MHz in  $\text{CDCl}_3$ ).

**Figure S26.**  $^{13}\text{C}$ -NMR and DEPT-135° Spectrum of **5** (125 MHz in  $\text{CDCl}_3$ ).

**Figure S27.** HMQC Spectrum of **5**.

**Figure S28.** HMBC Spectrum of **5**.

**Figure S29.**  $^1\text{H}$ - $^1\text{H}$ -COSY Spectrum of **5**.

**Figure S30.** HRTOFMS Spectrum of **6**.

**Figure S31.** FTIR Spectrum of **6**.

**Figure S32.**  $^1\text{H}$ -NMR Spectrum of **6** (500 MHz in  $\text{CDCl}_3$ ).

**Figure S33.**  $^{13}\text{C}$ -NMR and DEPT-135° Spectrum of **6** (125 MHz in  $\text{CDCl}_3$ ).

**Figure S34.** HRTOFMS Spectrum of **7**.

**Figure S35.** FTIR Spectrum of **7**.

**Figure S36.**  $^1\text{H}$ -NMR Spectrum of **7** (500 MHz in  $\text{CDCl}_3$ ).

**Figure S37.**  $^{13}\text{C}$ -NMR and DEPT-135° Spectrum of **7** (125 MHz in  $\text{CDCl}_3$ ).

**Figure S38.** Results of cytotoxic activity of **1** against MCF-7 cell line.

**Figure S39.** Results of cytotoxic activity of **2** against MCF-7 cell line.

**Figure S40.** Results of cytotoxic activity of **3** against MCF-7 cell line.

**Figure S41.** Results of cytotoxic activity of **4** against MCF-7 cell line.

**Figure S42.** Results of cytotoxic activity of **5** against MCF-7 cell line.

**Figure S43.** Results of cytotoxic activity of **6** against MCF-7 cell line.

**Figure S44.** Results of cytotoxic activity of **7** against MCF-7 cell line.

**Figure S45.** Results of cytotoxic activity of **1** against B16-F10 cell line.

**Figure S46.** Results of cytotoxic activity of **2** against B16-F10 cell line.

**Figure S47.** Results of cytotoxic activity of **3** against B16-F10 cell line.

**Figure S48.** Results of cytotoxic activity of **4** against B16-F10 cell line.

**Figure S49.** Results of cytotoxic activity of **5** against B16-F10 cell line.

**Figure S50.** Results of cytotoxic activity of **6** against B16-F10 cell line.

**Figure S51.** Results of cytotoxic activity of **7** against B16-F10 cell line.

**Figure S52.** Results of cytotoxic activity of **1** against CV-1 cell line.

**Figure S53.** Results of cytotoxic activity of **2** against CV-1 cell line.

**Figure S54.** Results of cytotoxic activity of **3** against CV-1 cell line.

**Figure S55.** Results of cytotoxic activity of **4** against CV-1 cell line.

**Figure S56.** Results of cytotoxic activity of **5** against CV-1 cell line.

**Figure S57.** Results of cytotoxic activity of **6** against CV-1 cell line.

**Figure S58.** Results of cytotoxic activity of **7** against CV-1 cell line.

**Figure S59.** TLC profile of compounds **1-7**.

**Figure S1.** HRTOFMS Spectrum of **1**.

**Single Mass Analysis**

Tolerance = 5.0 mDa / DBE: min = -1.5, max = 50.0

Element prediction: Off

Number of isotope peaks used for i-FIT = 3

Monoisotopic Mass, Even Electron Ions

109 formula(e) evaluated with 1 results within limits (all results (up to 1000) for each mass)

Elements Used:

C: 0-500 H: 0-1000 O: 0-200

DAMMARANE KINDI 4 (0.085) Cm (2:5)

TOF MS ES+

1.46e+004

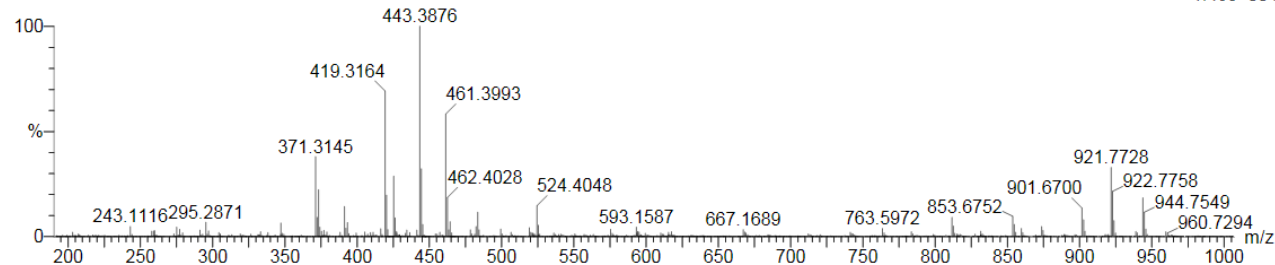

Minimum: -1.5  
Maximum: 5.0 10.0 50.0

| Mass     | Calc. Mass | mDa  | PPM  | DBE | i-FIT | i-FIT (Norm) | Formula    |
|----------|------------|------|------|-----|-------|--------------|------------|
| 461.3993 | 461.3995   | -0.2 | -0.4 | 4.5 | 93.2  | 0.0          | C30 H53 O3 |

**Figure S2.** FTIR Spectrum of **1**.

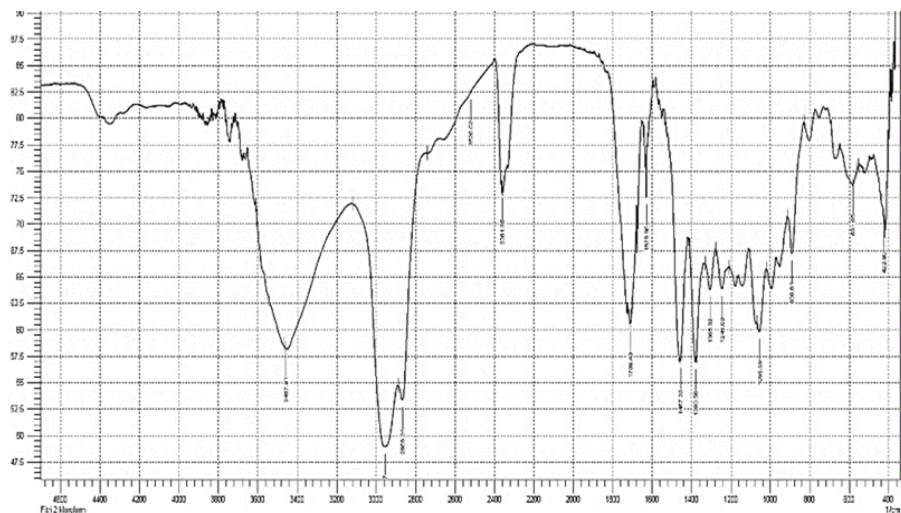

**Figure S3.**  $^1\text{H}$ -NMR Spectrum of **1** (500 MHz in  $\text{CDCl}_3$ ).

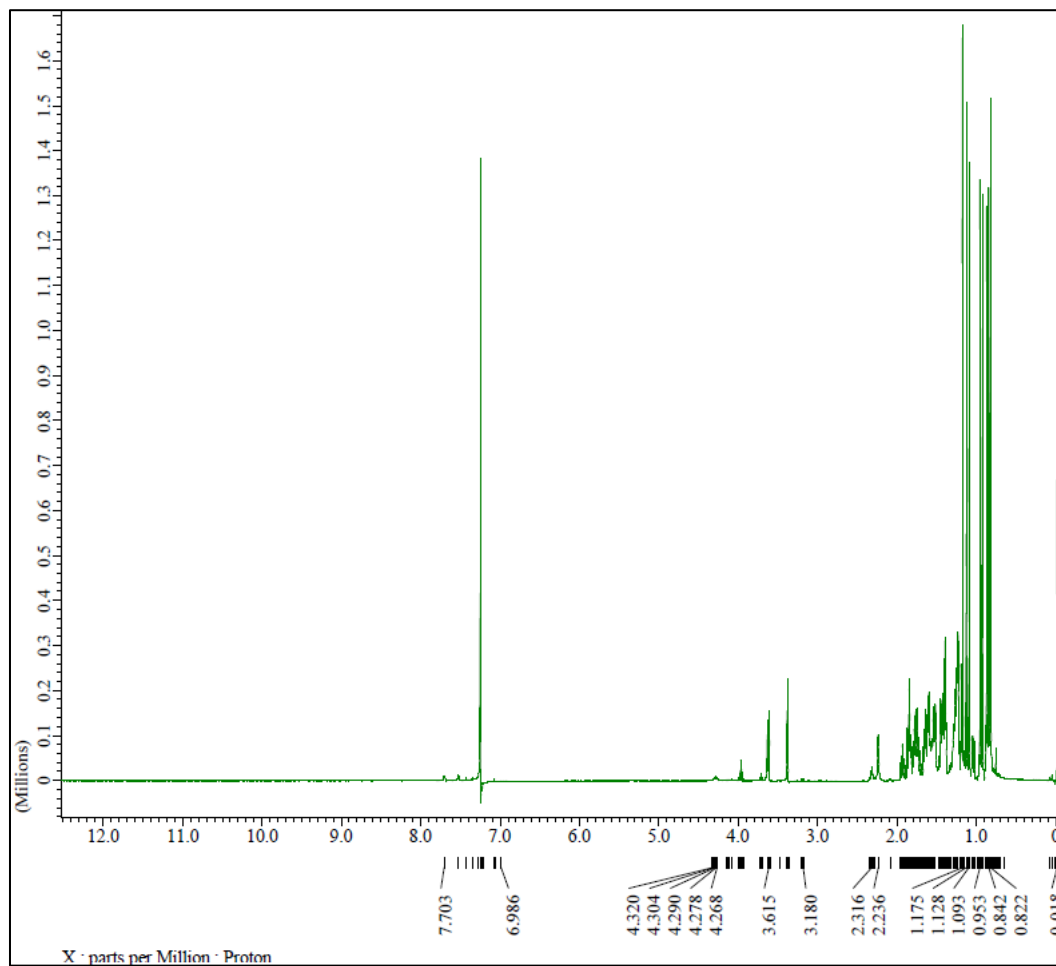

**Figure S4.**  $^{13}\text{C}$ -NMR and DEPT-135 $^\circ$  Spectrum of **1** (125 MHz in  $\text{CDCl}_3$ ).

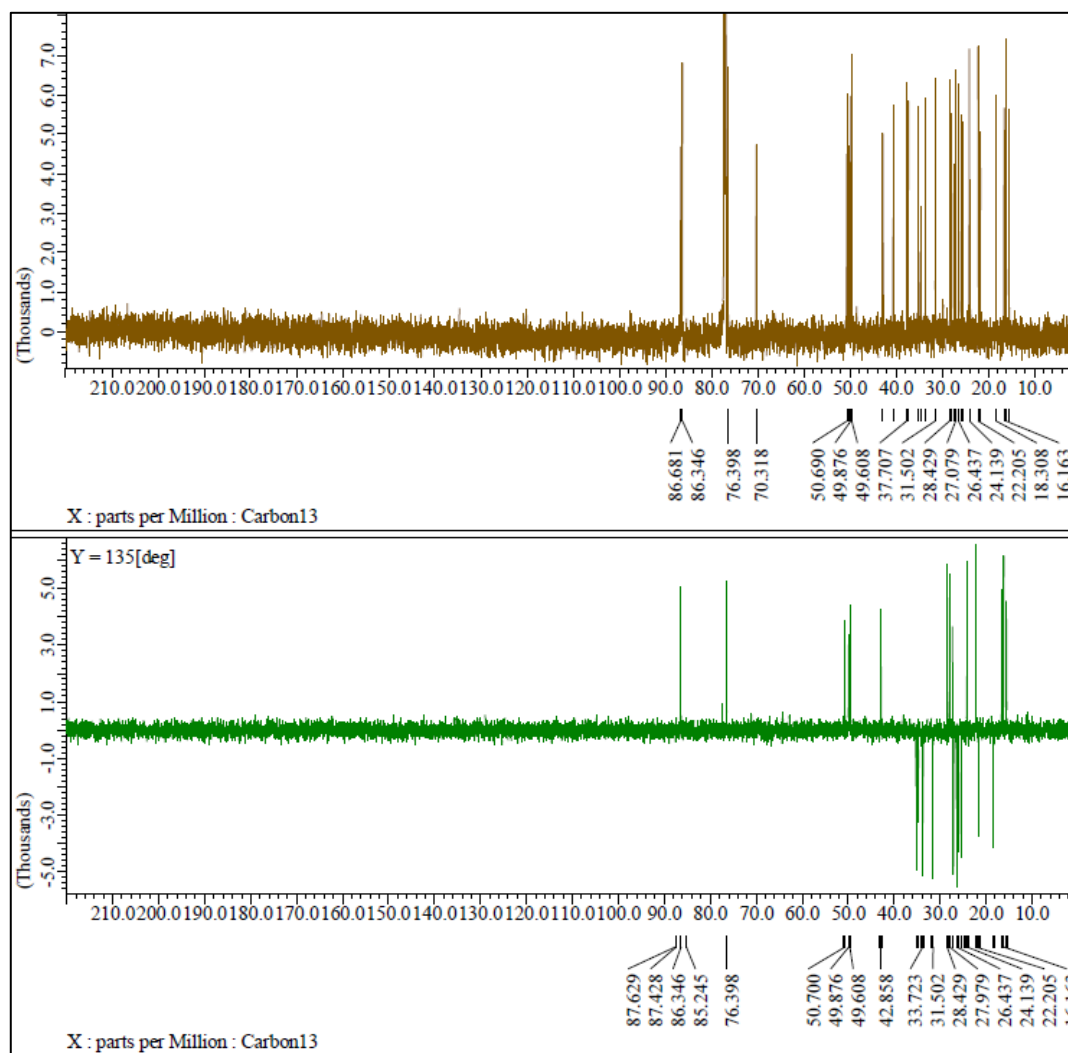

**Figure S5.** HMQC Spectrum of **1**.

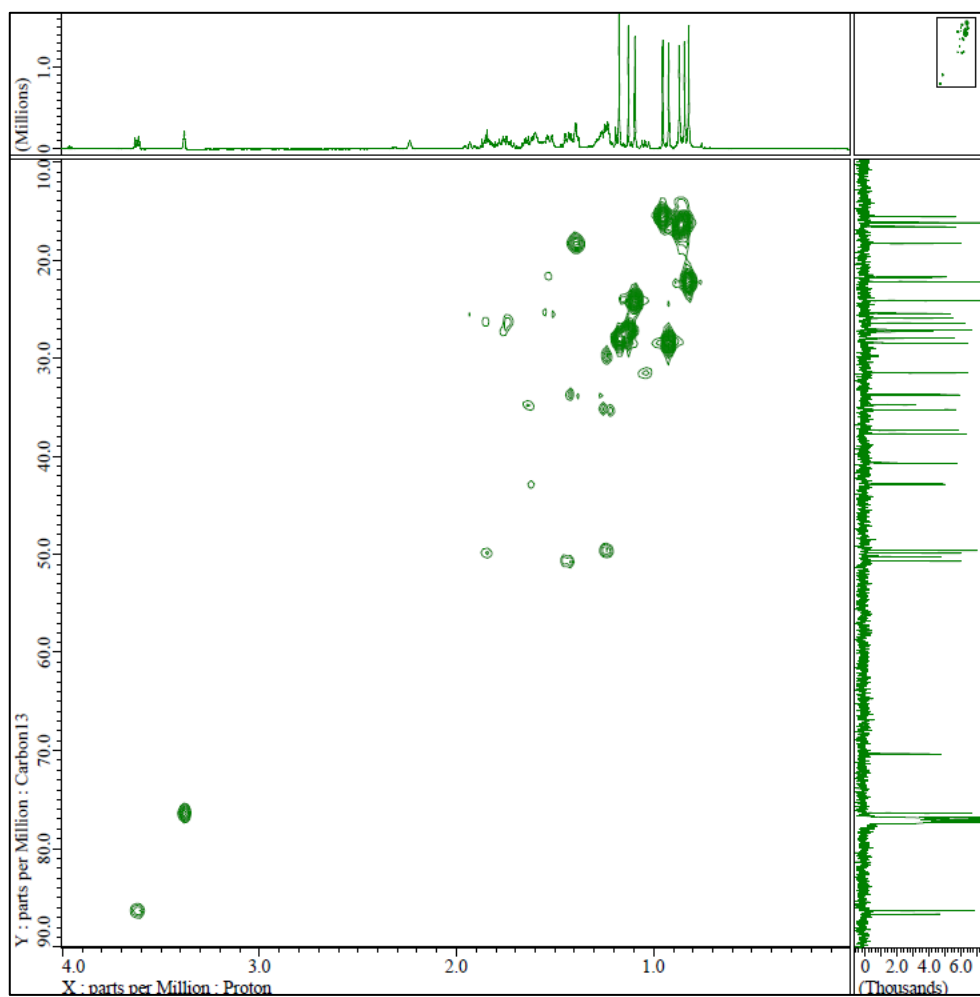



**Figure S6.** HMBC Spectrum of **1**.

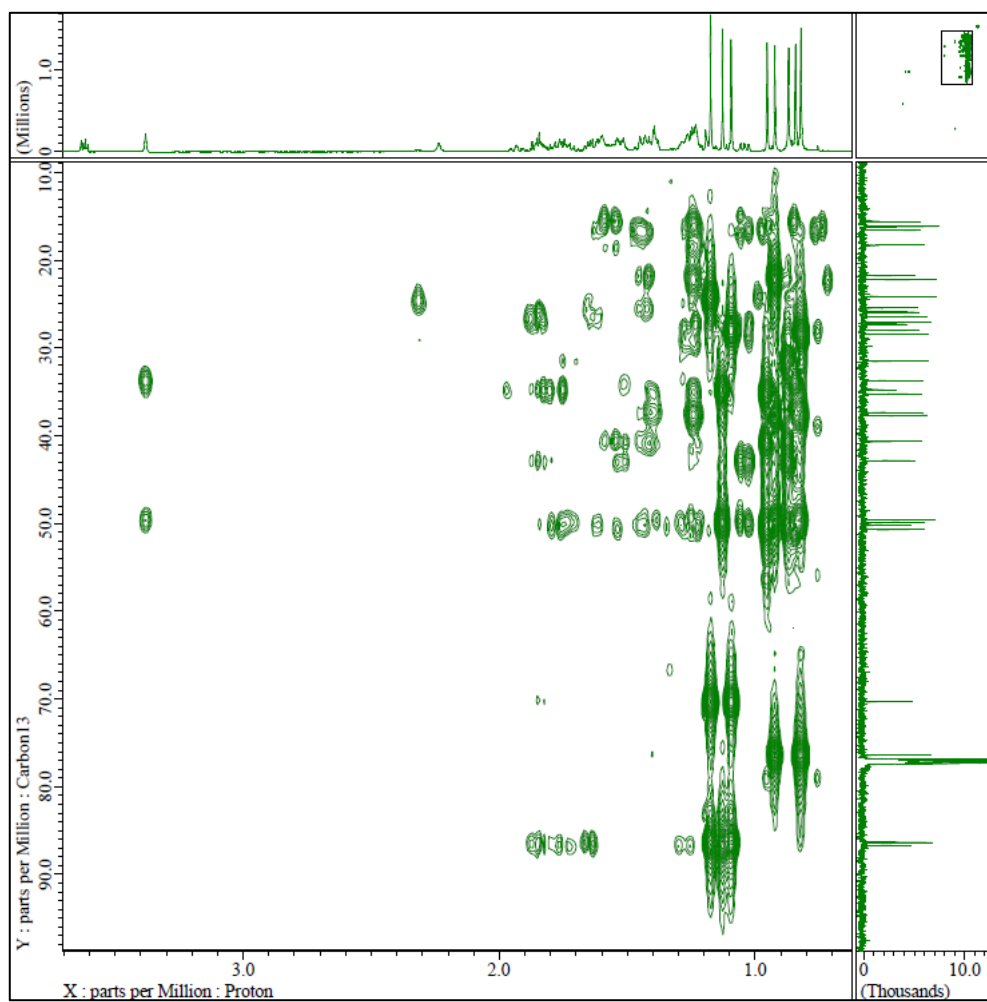

**Figure S7.**  $^1\text{H}$ - $^1\text{H}$ -COSY Spectrum of **1**.

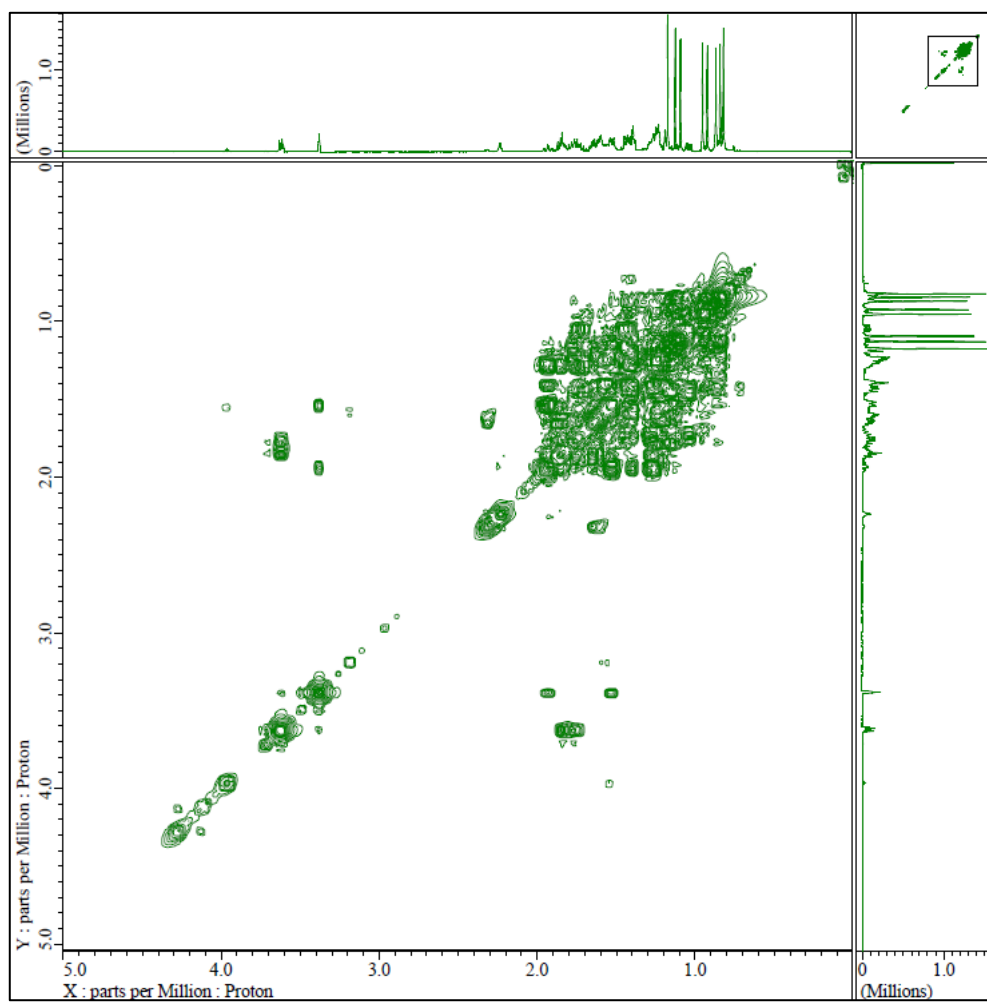

**Figure S8. HRTOFMS Spectrum of 2.**

**Single Mass Analysis**

Tolerance = 50.0 mDa / DBE: min = -1.5, max = 50.0

Element prediction: Off

Number of isotope peaks used for i-FIT = 3

Monoisotopic Mass, Even Electron Ions

95 formula(e) evaluated with 6 results within limits (up to 50 closest results for each mass)

Elements Used:

C: 0-500 H: 0-1000 O: 0-200

KIN C 4 21 (0.376) Cm (19.21)

TOF MS ES+

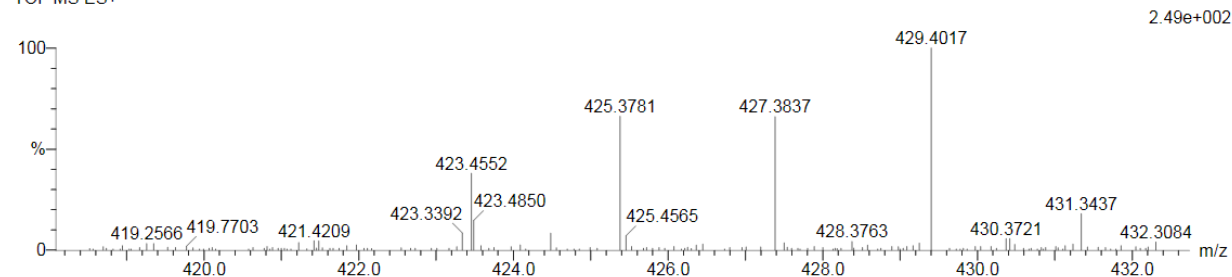

Minimum: -1.5  
Maximum: 50.0 10.0 50.0

| Mass     | Calc. Mass | mDa  | PPM  | DBE | i-FIT | i-FIT (Norm) | Formula   |
|----------|------------|------|------|-----|-------|--------------|-----------|
| 425.3781 | 425.3783   | -0.2 | -0.5 | 6.5 | 81.9  | 1.2          | C30 H49 O |

**Figure S9. FTIR Spectrum of 2.**

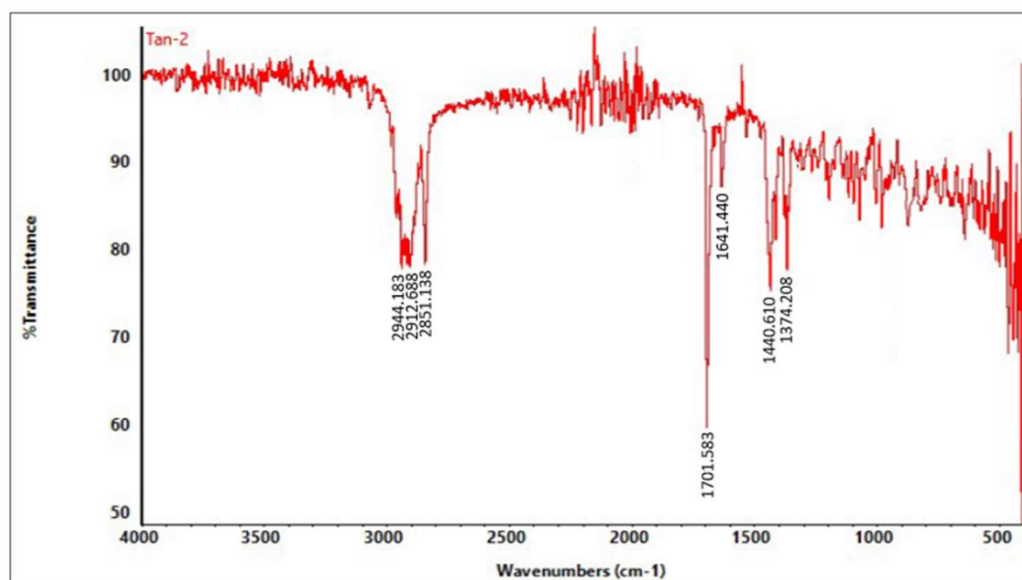

**Figure S10.**  $^1\text{H}$ -NMR Spectrum of **2** (500 MHz in  $\text{CDCl}_3$ ).

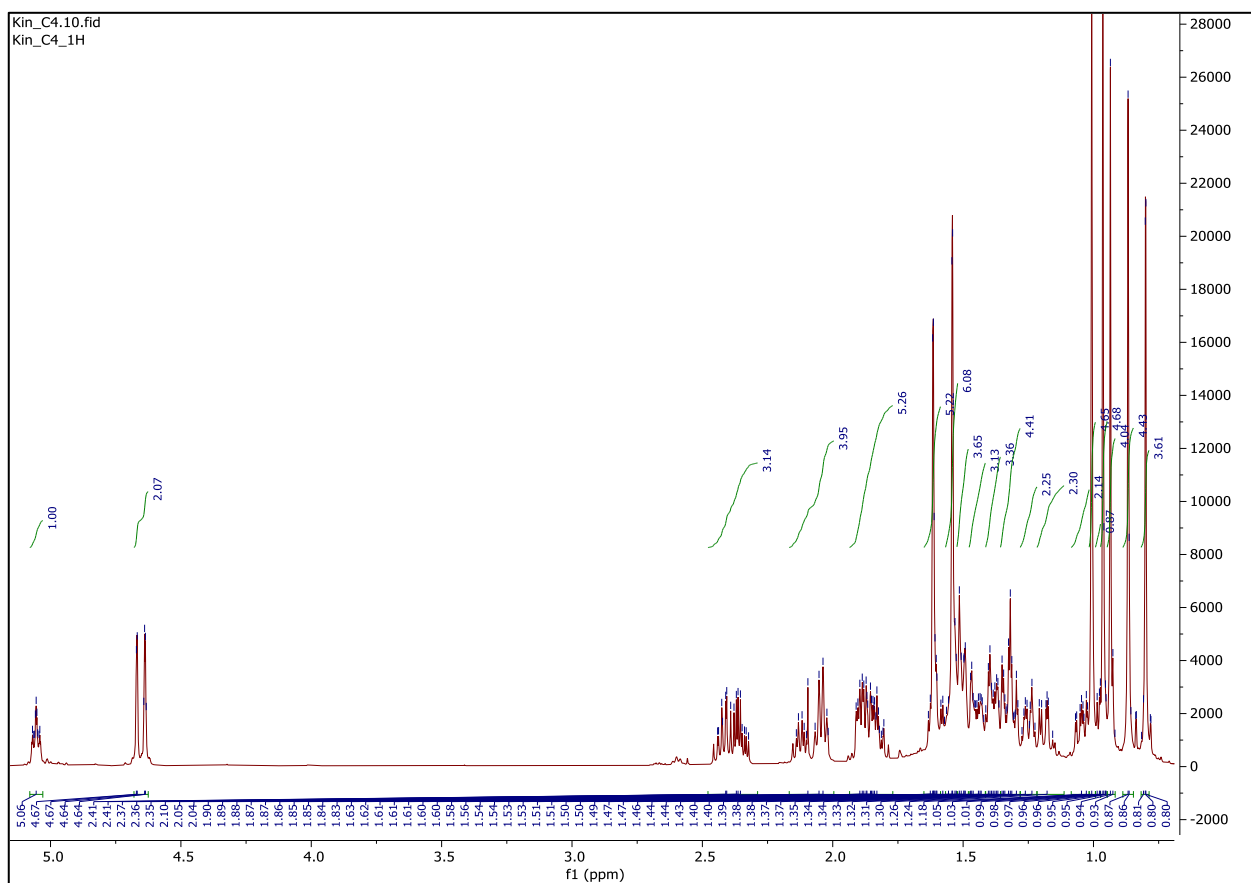

**Figure S11.**  $^{13}\text{C}$ -NMR and DEPT-135° Spectrum of **2** (125 MHz in  $\text{CDCl}_3$ ).

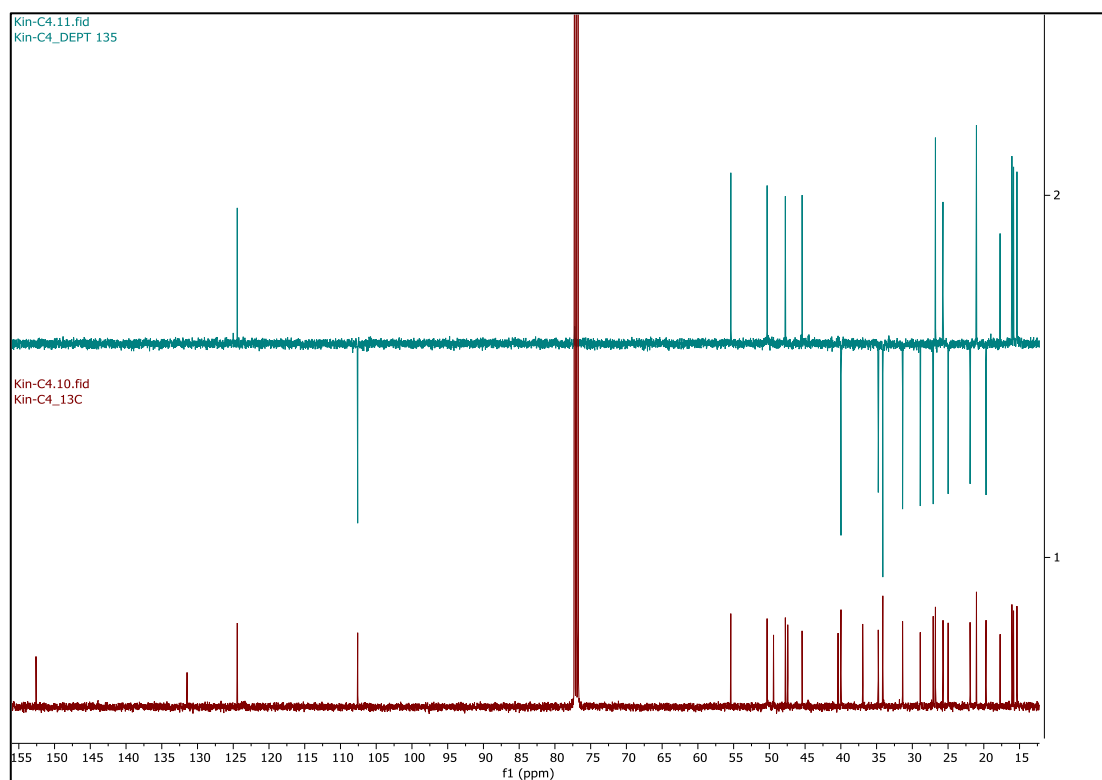

**Figure S12.** HRTOFMS Spectrum of **3**.

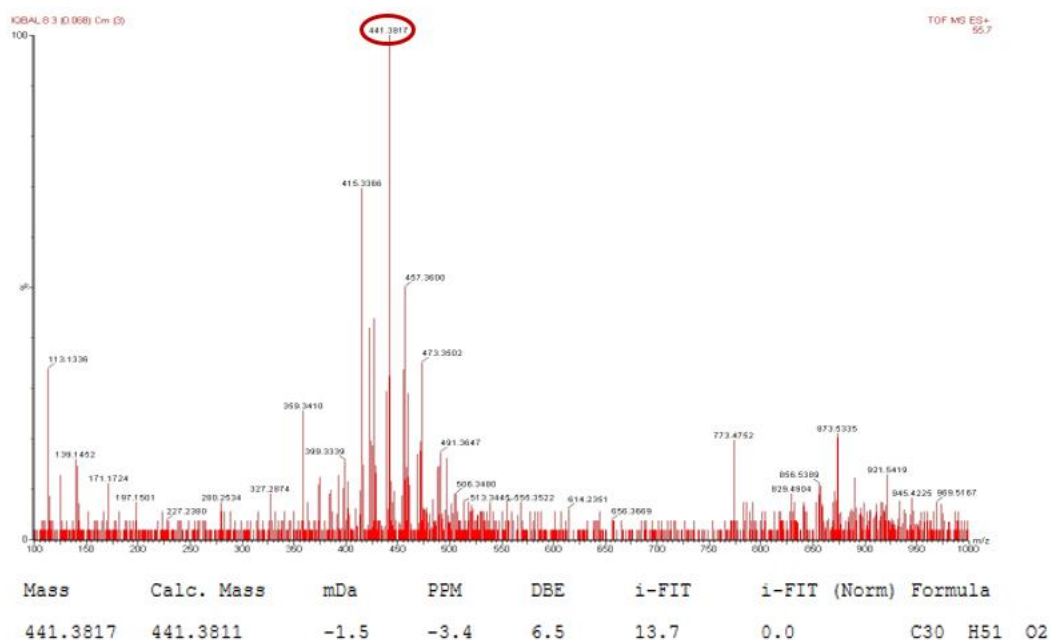

**Figure S13.** FTIR Spectrum of **3**.

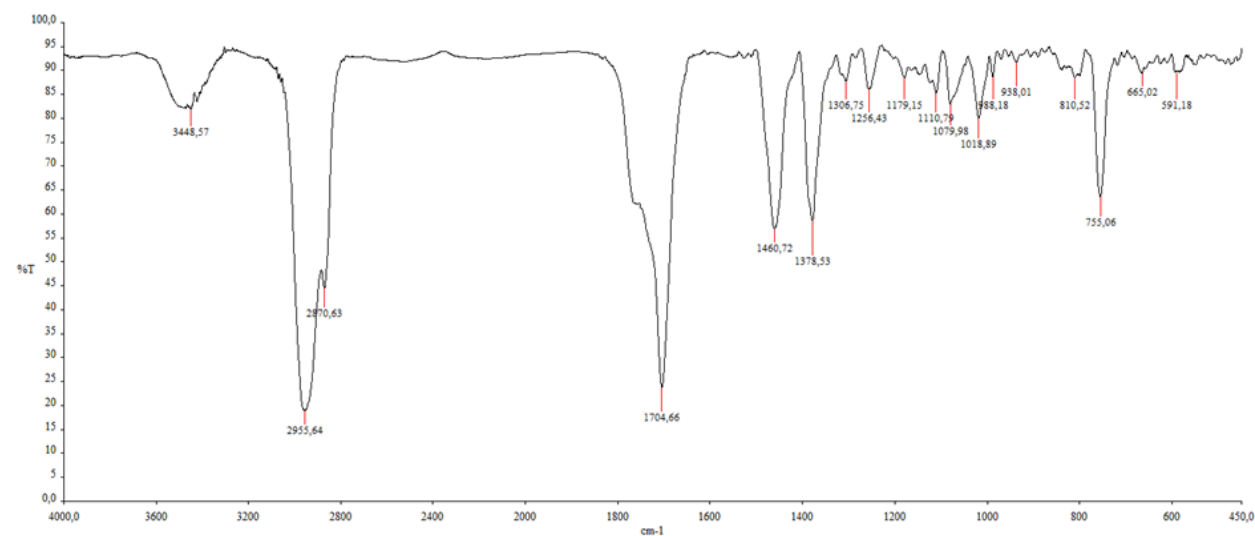

**Figure S14.**  $^1\text{H}$ -NMR Spectrum of **3** (500 MHz in  $\text{CDCl}_3$ ).

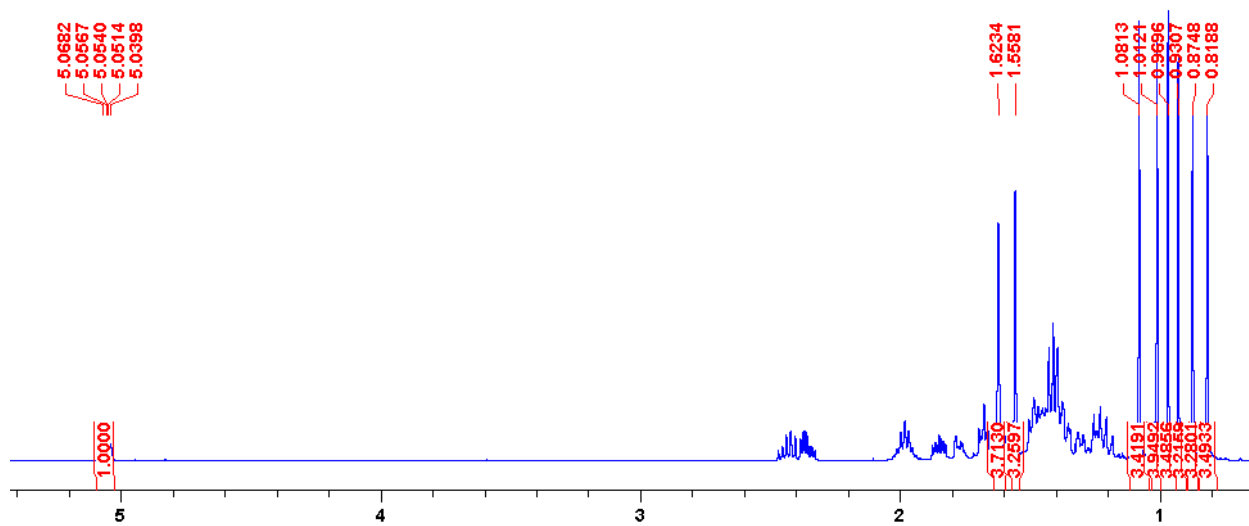

**Figure S15.**  $^{13}\text{C}$ -NMR and DEPT-135 $^\circ$  Spectrum of **3** (125 MHz in  $\text{CDCl}_3$ ).

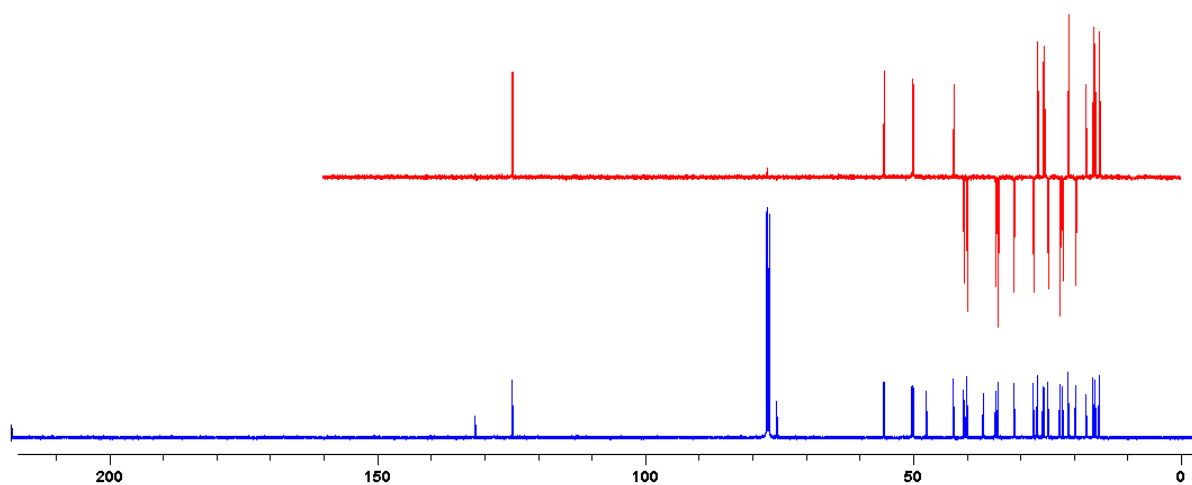

**Figure S16.** HRTOFMS Spectrum of **4**.

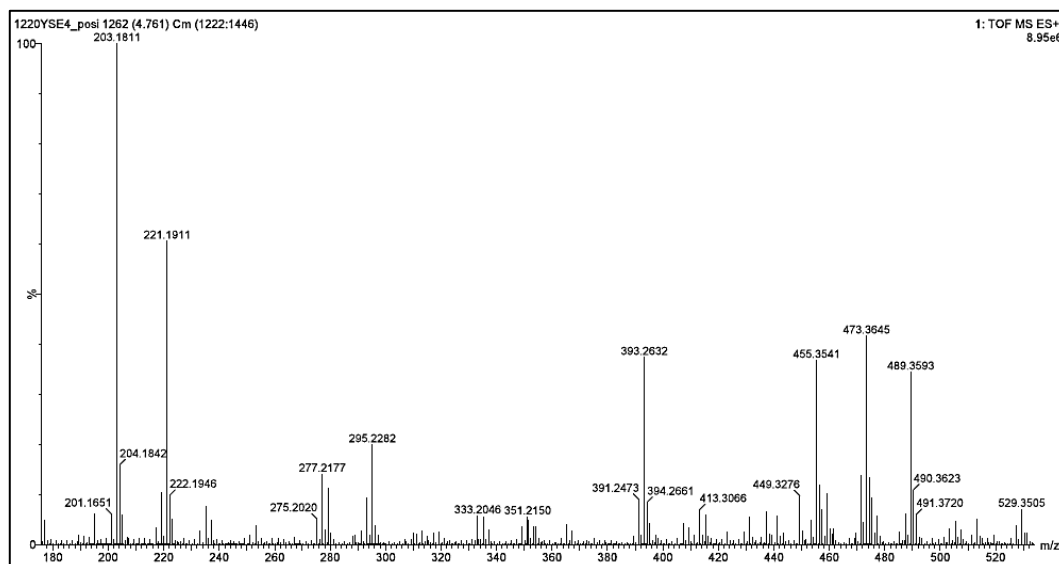

**Figure S17.** FTIR Spectrum of **4**.

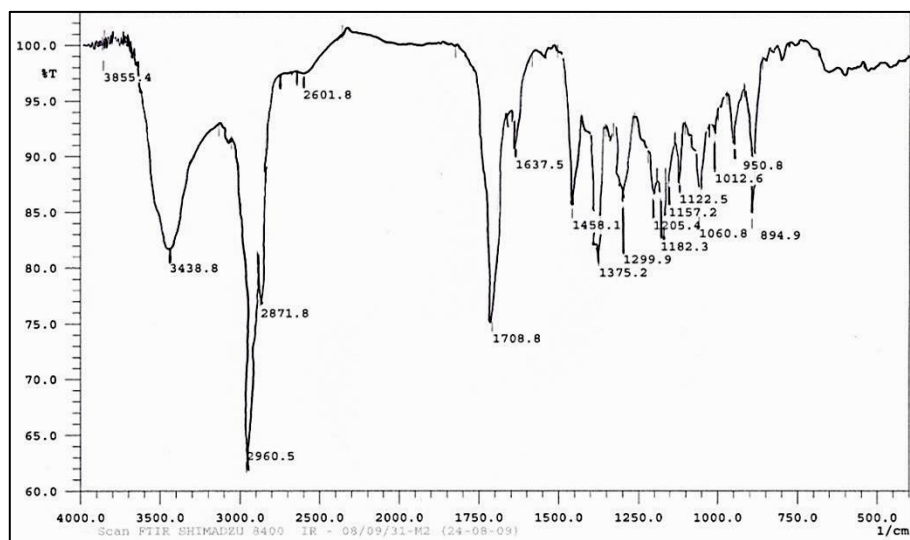

**Figure S18.**  $^1\text{H}$ -NMR Spectrum of **4** (500 MHz in  $\text{CDCl}_3$ ).

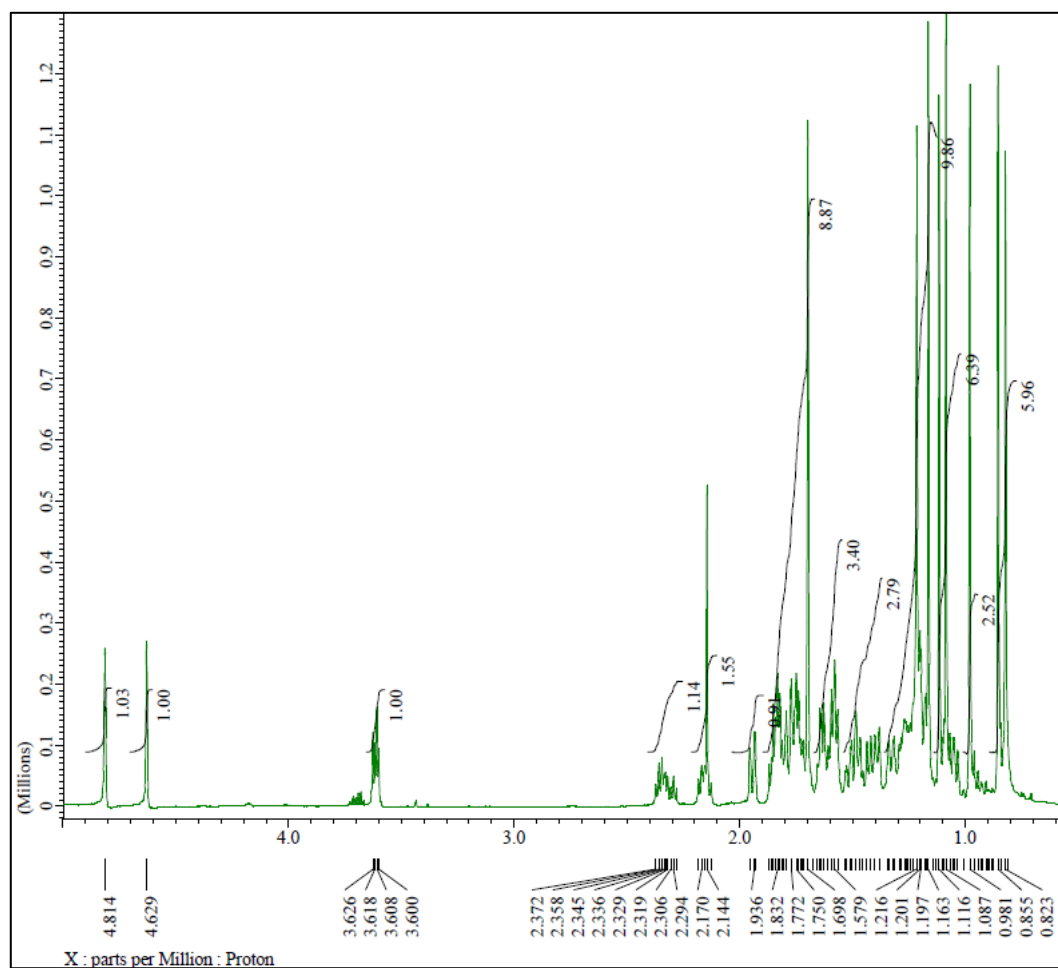



**Figure S19.**  $^{13}\text{C}$ -NMR and DEPT-135° Spectrum of **4** (125 MHz in  $\text{CDCl}_3$ ).

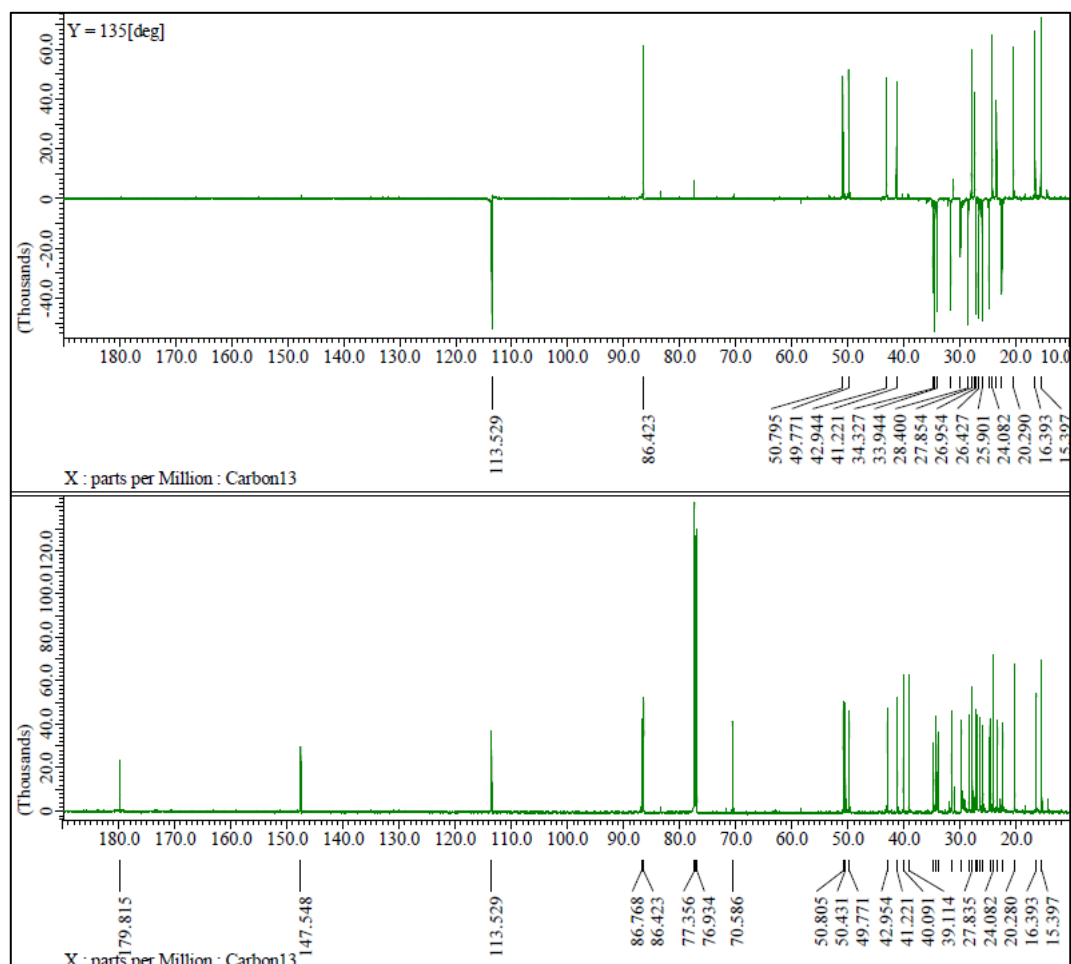

**Figure S20.** HMQC Spectrum of **4**.

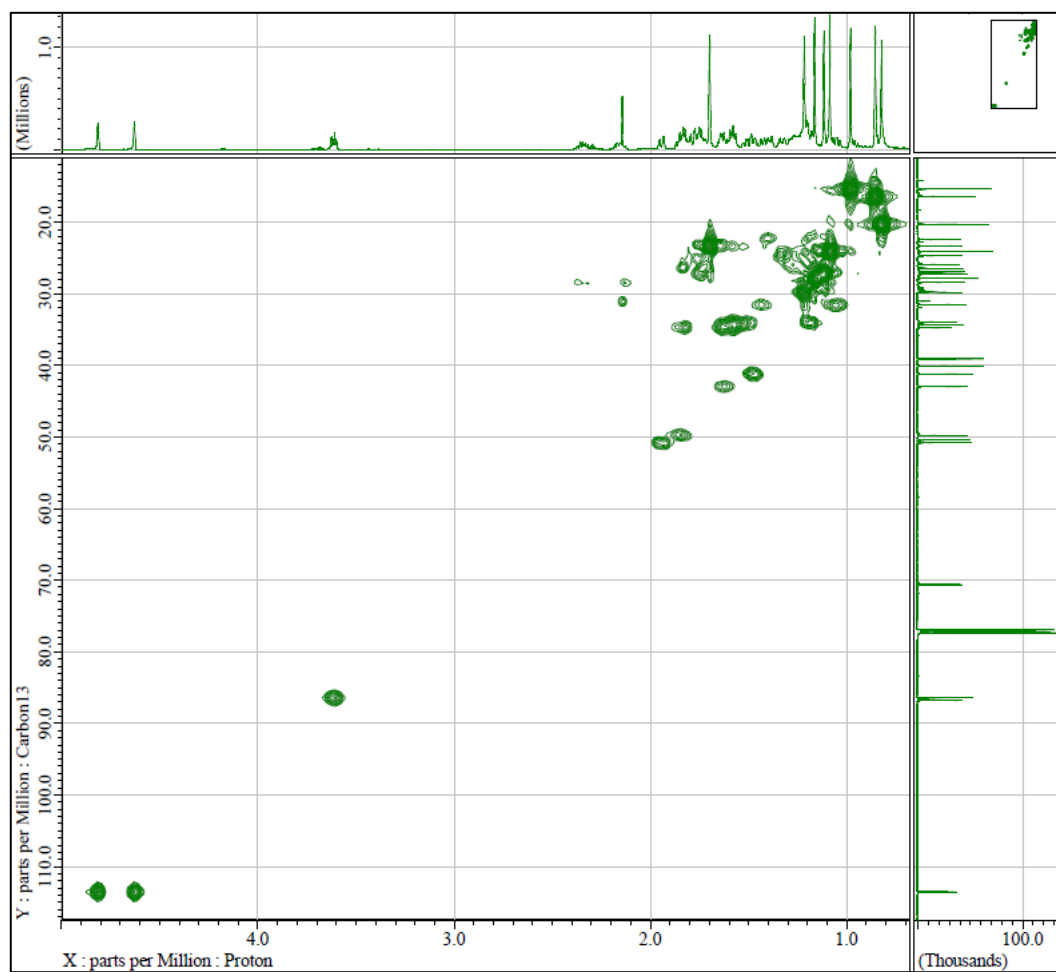

**Figure S21.** HMBC Spectrum of **4**.

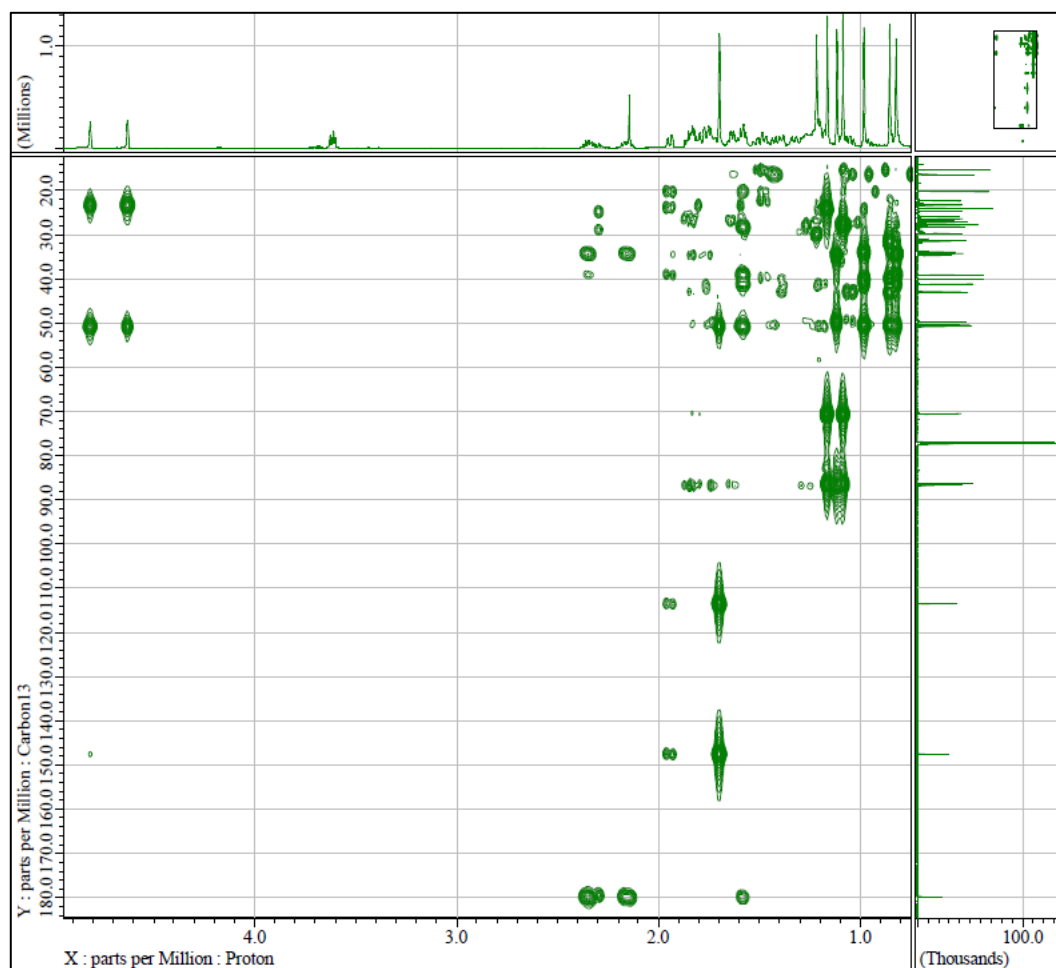

**Figure S22.**  $^1\text{H}$ - $^1\text{H}$ -COSY Spectrum of **4**.

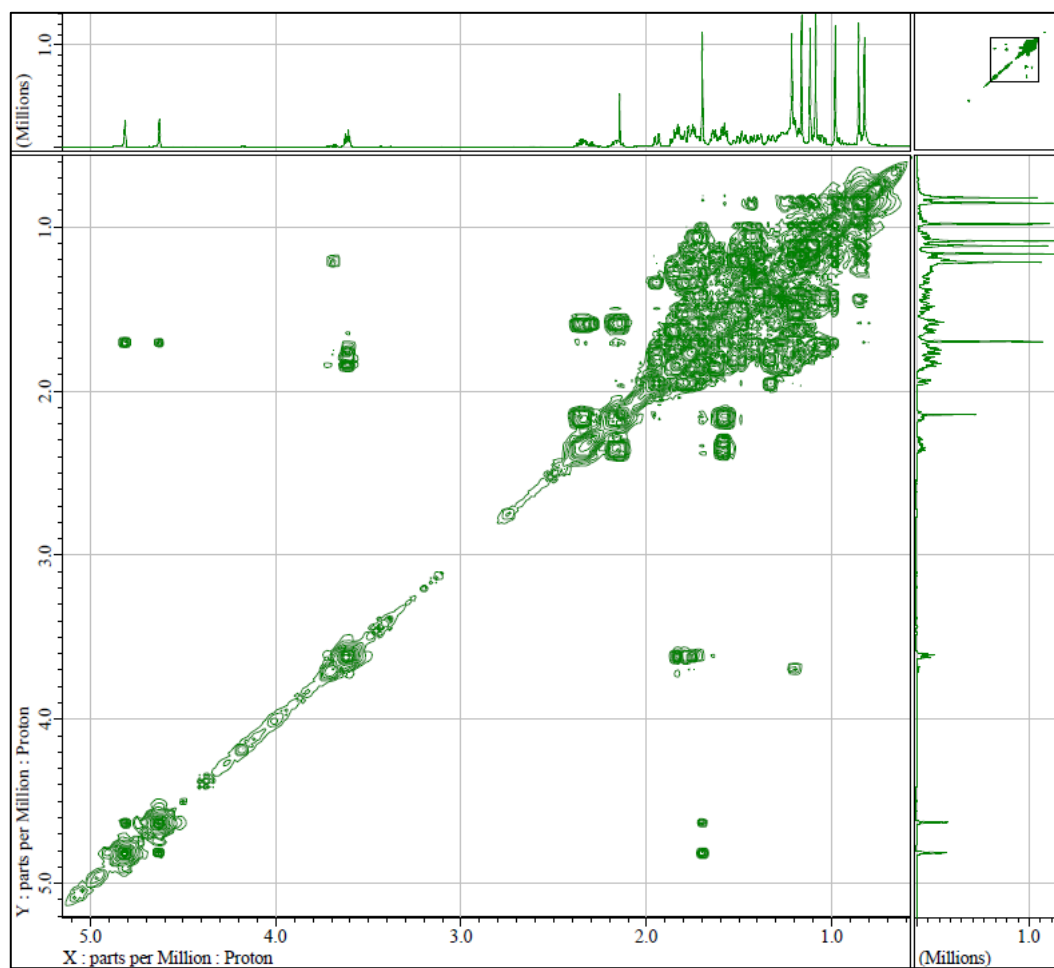

**Figure S23.** HRTOFMS Spectrum of **5**.

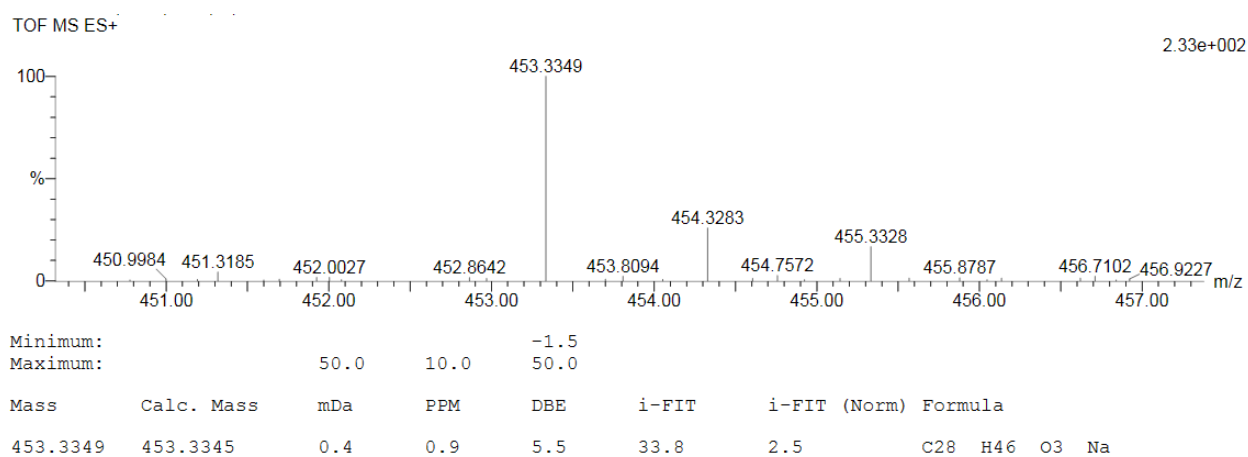

**Figure S24.** FTIR Spectrum of **5**.

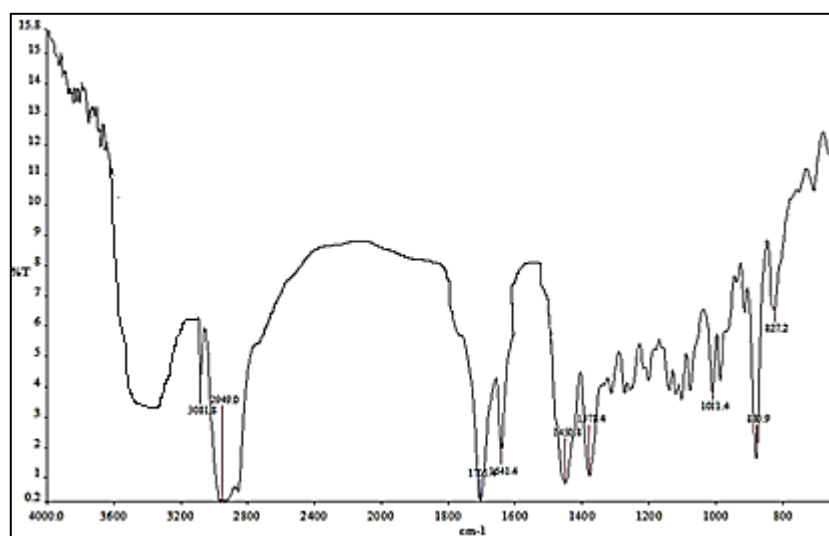

**Figure S25.**  $^1\text{H}$ -NMR Spectrum of **5** (500 MHz in  $\text{CDCl}_3$ ).

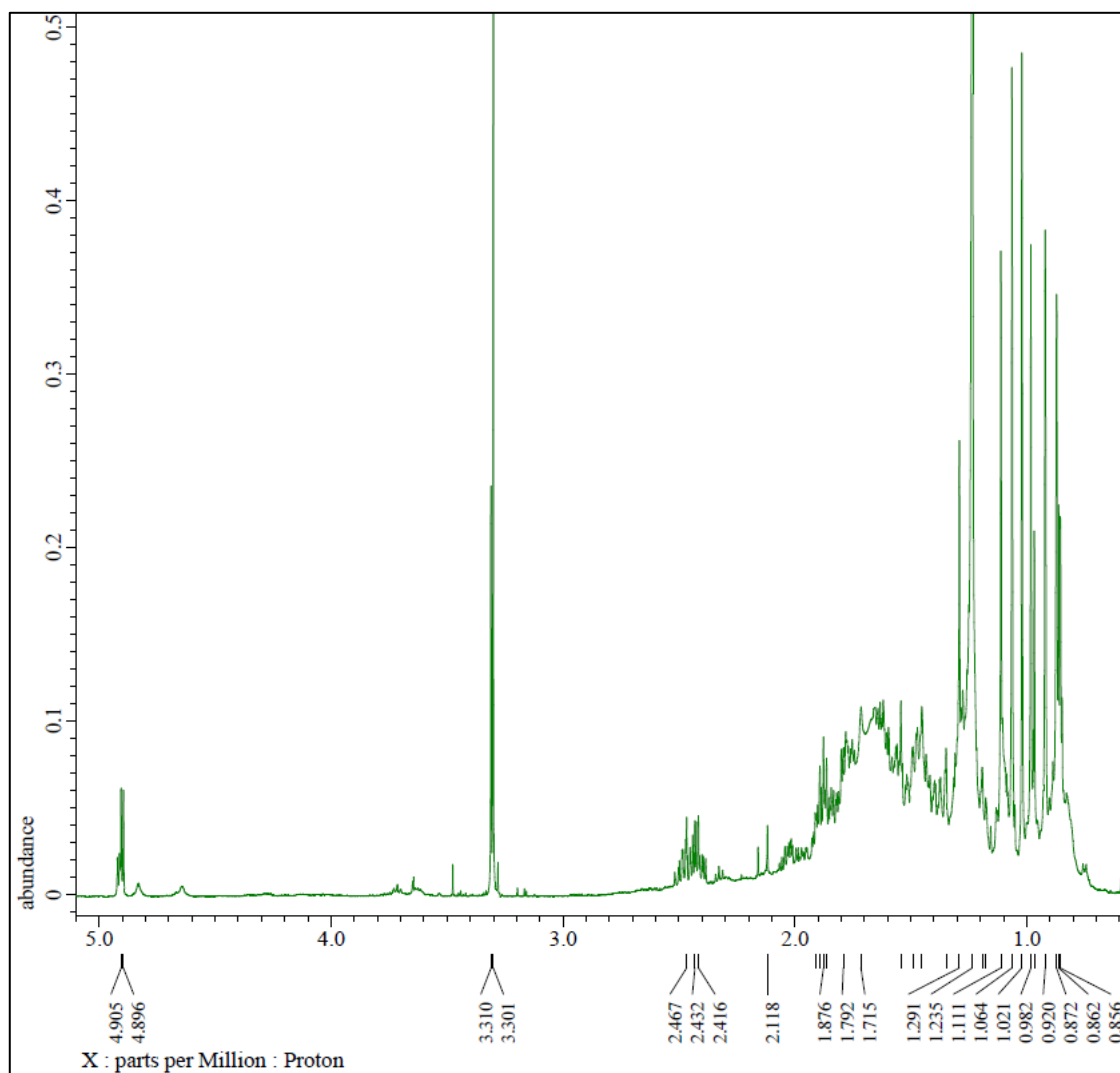

**Figure S26.**  $^{13}\text{C}$ -NMR and DEPT-135° Spectrum of **5** (125 MHz in  $\text{CDCl}_3$ ).

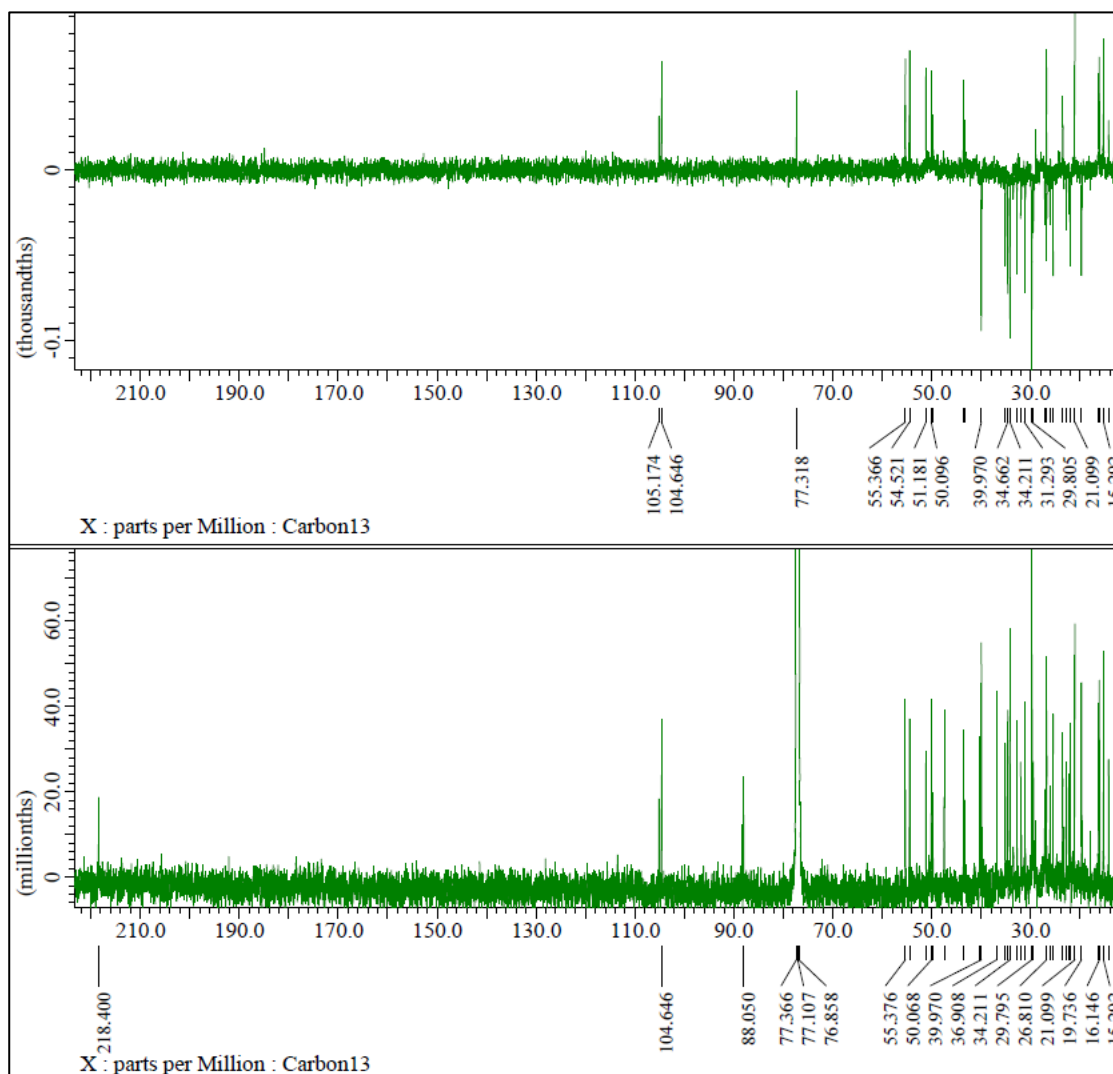

**Figure S27.** HMQC Spectrum of **5**.

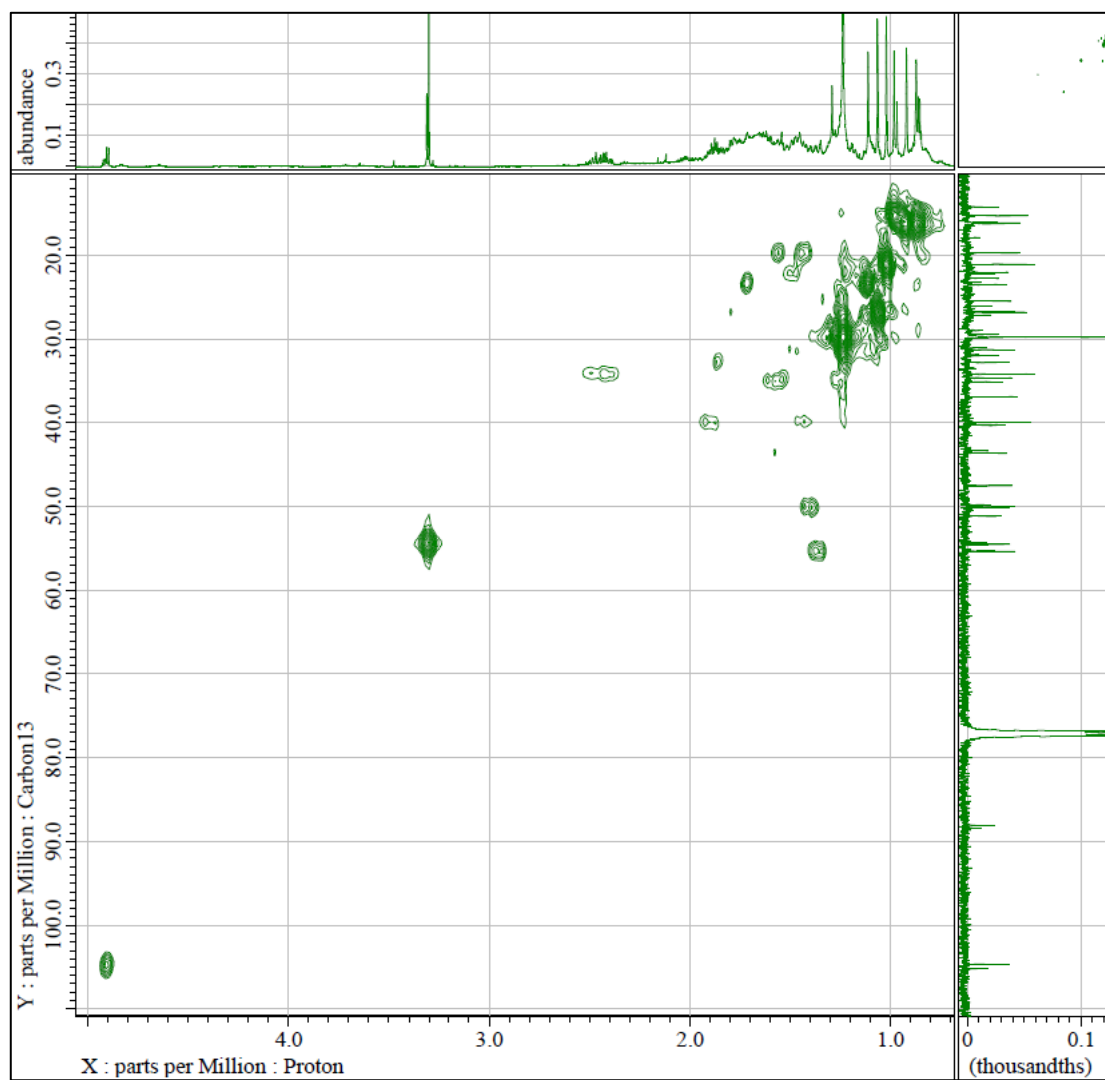



**Figure S28.** HMBC Spectrum of **5**.

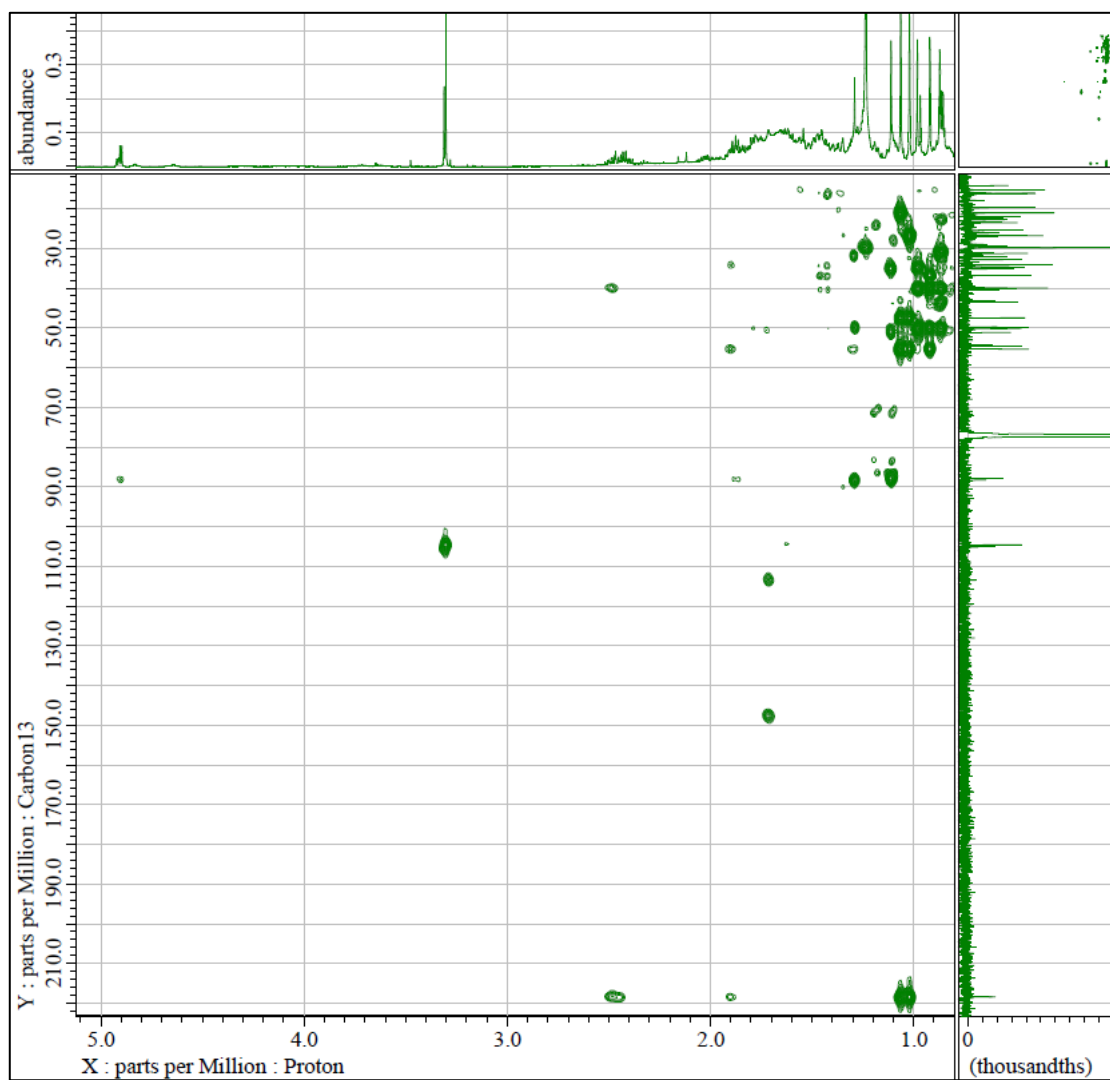

**Figure S29.**  $^1\text{H}$ - $^1\text{H}$ -COSY Spectrum of **5**.

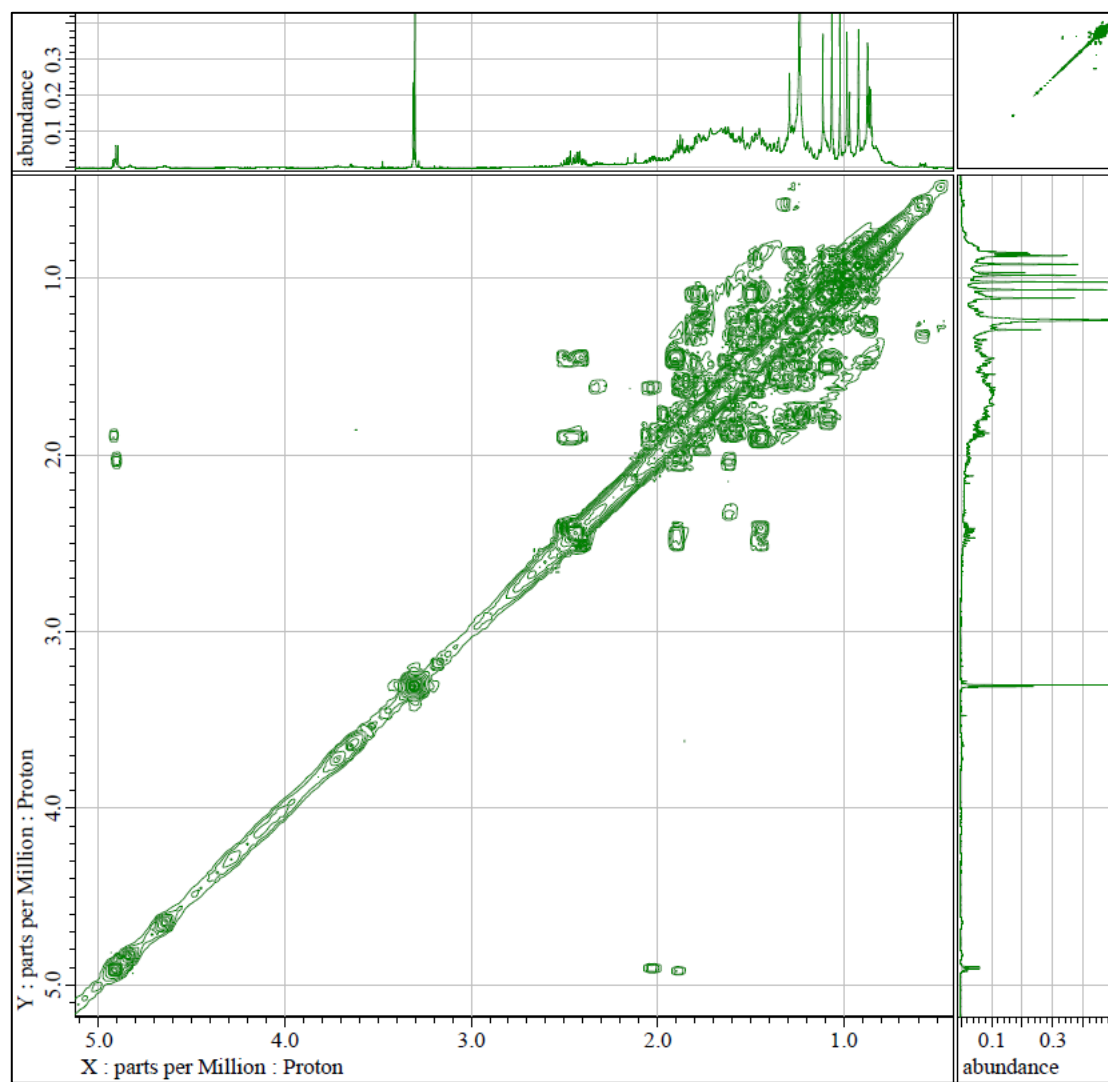

**Figure S30. HRTOFMS Spectrum of 6.**

**Single Mass Analysis**

Tolerance = 50.0 mDa / DBE: min = -1.5, max = 50.0

Element prediction: Off

Number of isotope peaks used for i-FIT = 3

Monoisotopic Mass, Even Electron Ions

222 formula(e) evaluated with 21 results within limits (up to 50 closest results for each mass)

Elements Used:

C: 0-500 H: 0-1000 O: 0-200 Na: 0-1

KIN C 15 22 (0.393) Cm (22)

TOF MS ES+

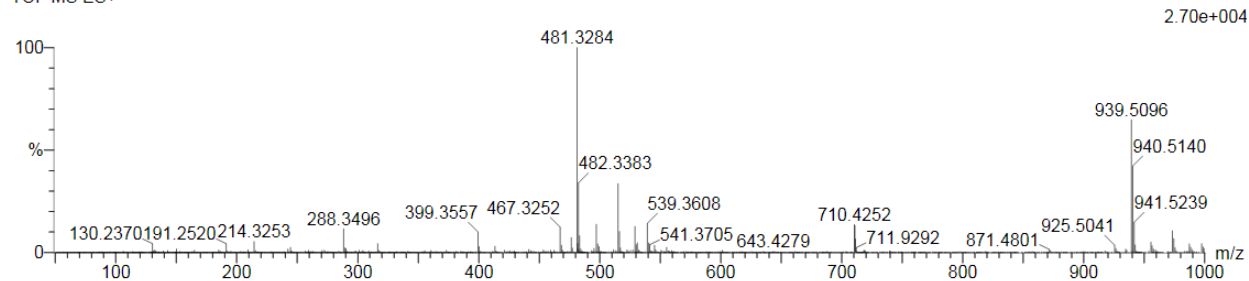

Minimum: -1.5  
Maximum: 50.0 10.0 50.0

| Mass     | Calc. Mass | mDa  | PPM  | DBE | i-FIT | i-FIT (Norm) | Formula                                           |
|----------|------------|------|------|-----|-------|--------------|---------------------------------------------------|
| 481.3284 | 481.3294   | -1.0 | -2.1 | 6.5 | 99.1  | 2.9          | C <sub>29</sub> H <sub>46</sub> O <sub>4</sub> Na |

**Figure S31. FTIR Spectrum of 6.**

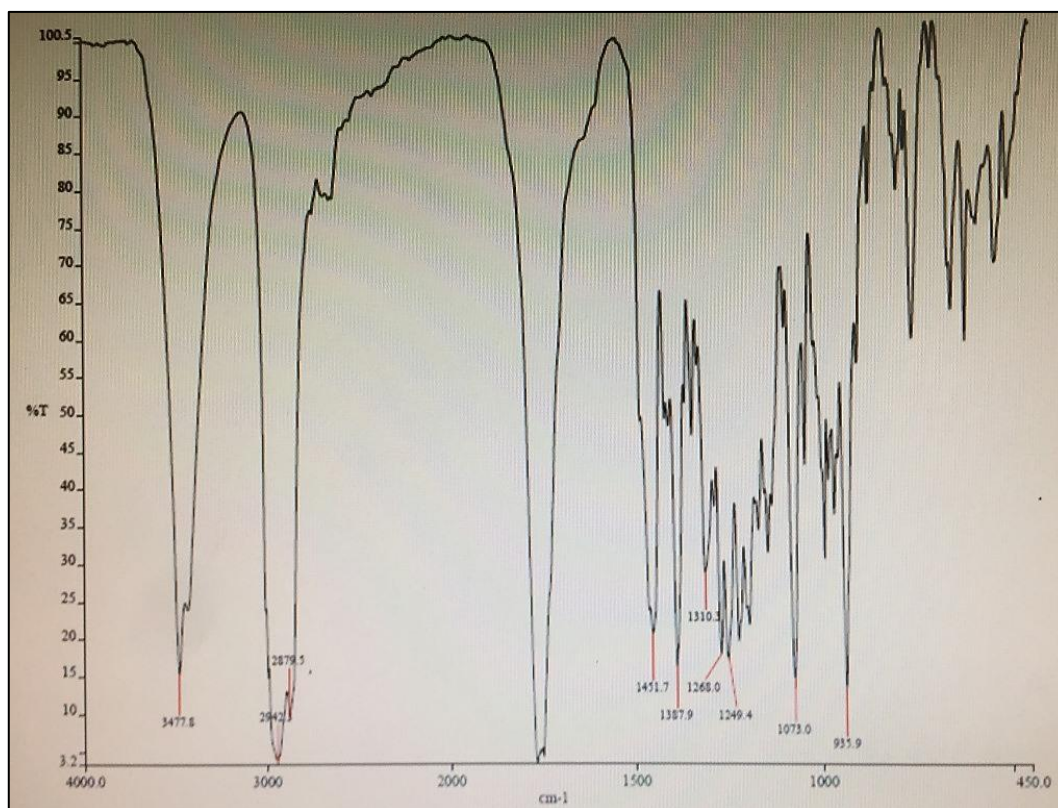

**Figure S32.**  $^1\text{H}$ -NMR Spectrum of **6** (500 MHz in  $\text{CDCl}_3$ ).

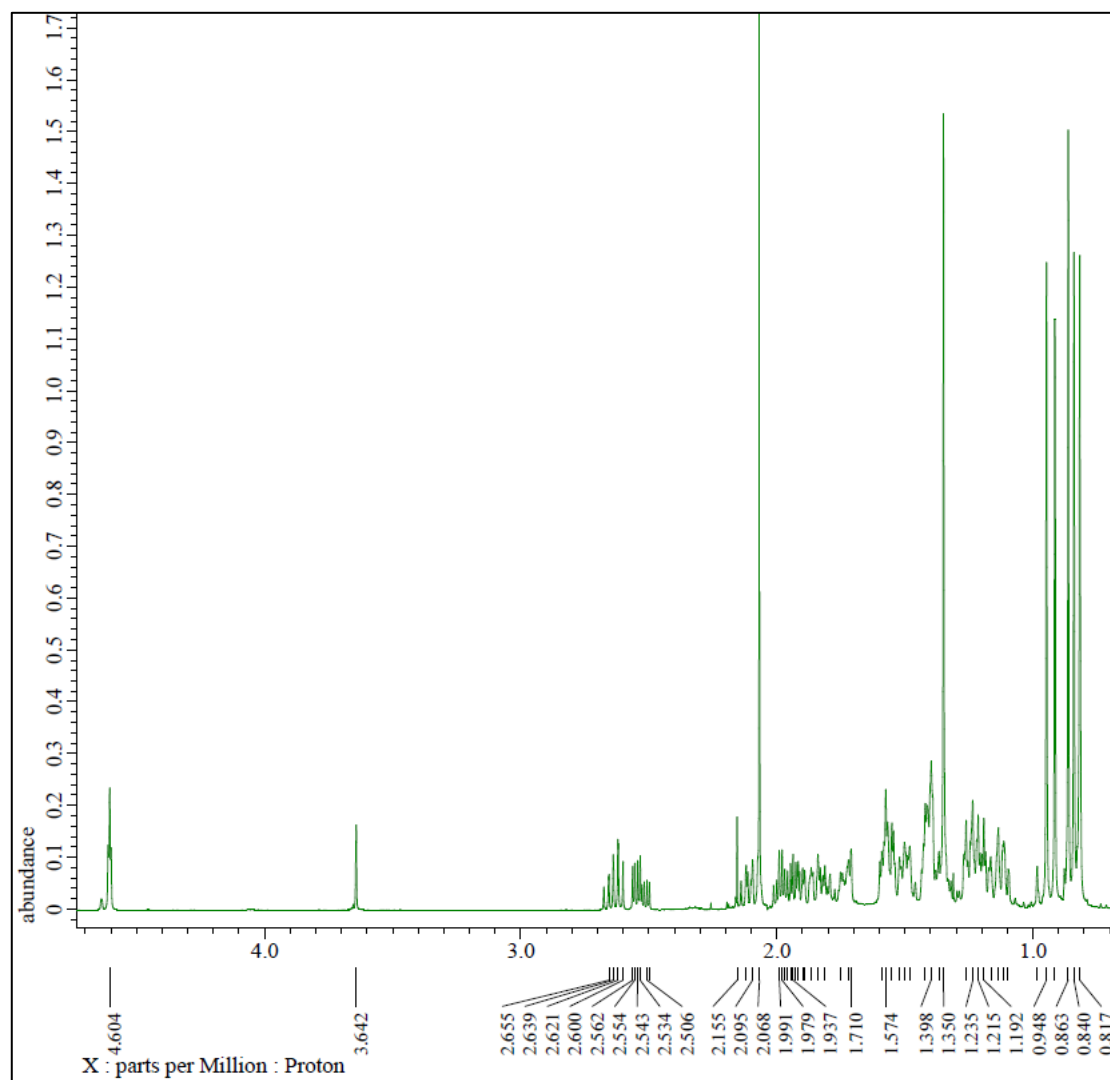

**Figure S33.**  $^{13}\text{C}$ -NMR and DEPT-135° Spectrum of **6** (125 MHz in  $\text{CDCl}_3$ ).

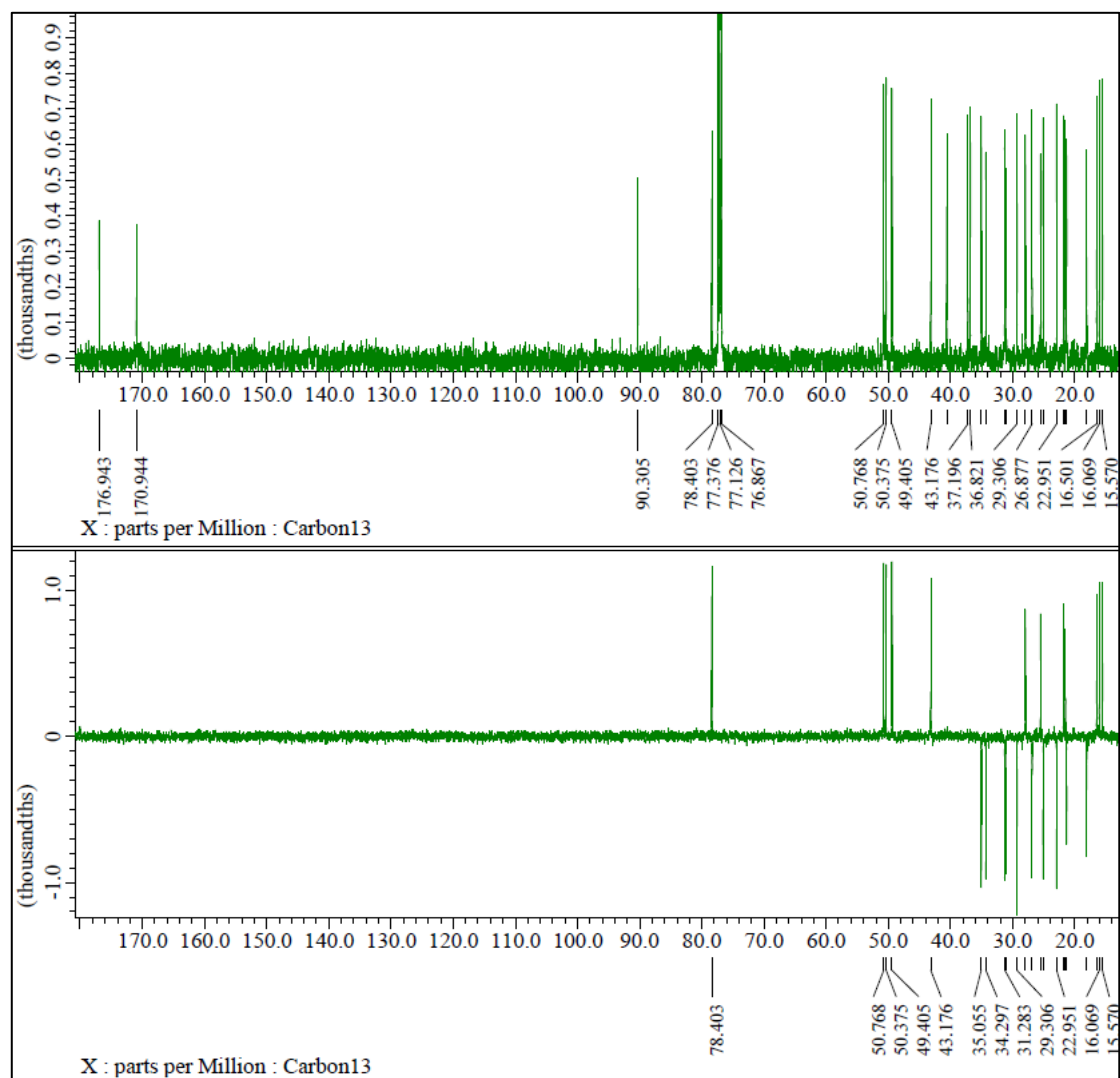

**Figure S34.** HRTOFMS Spectrum of **7**.

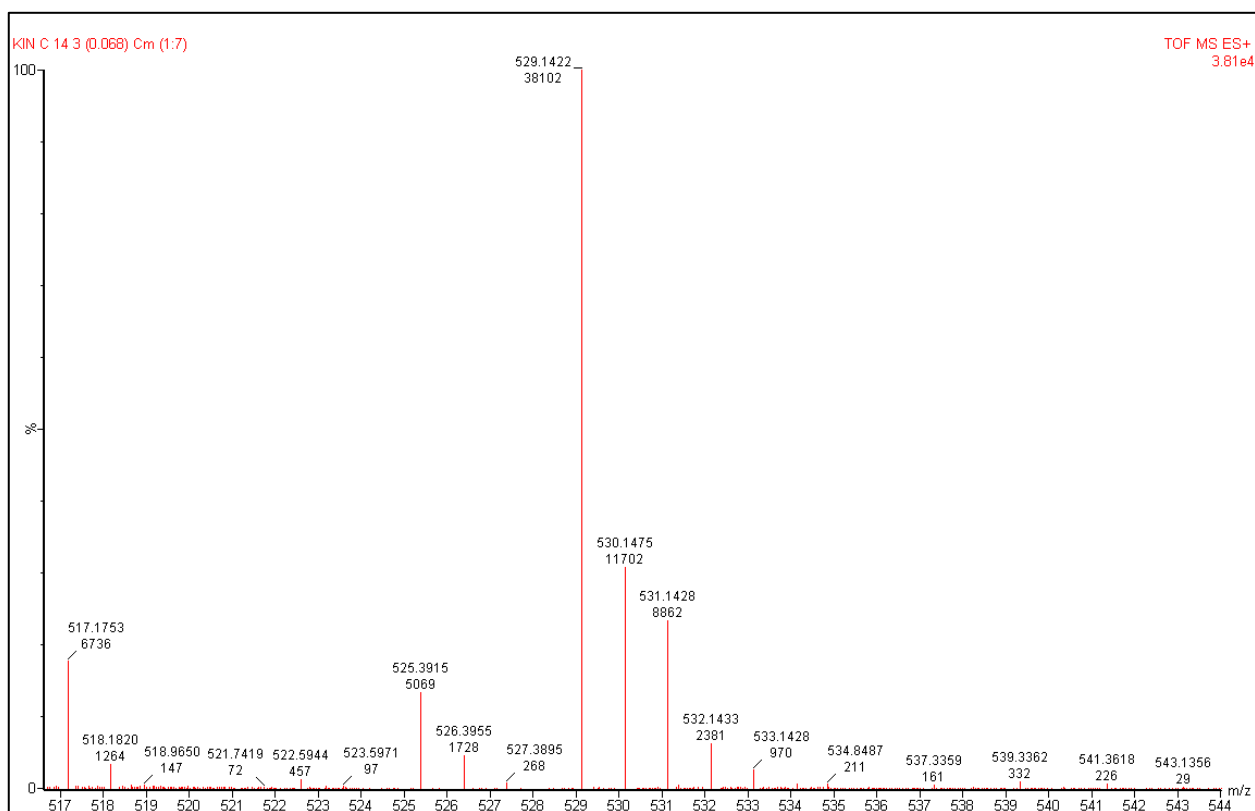

**Figure S35.** FTIR Spectrum of **7**.

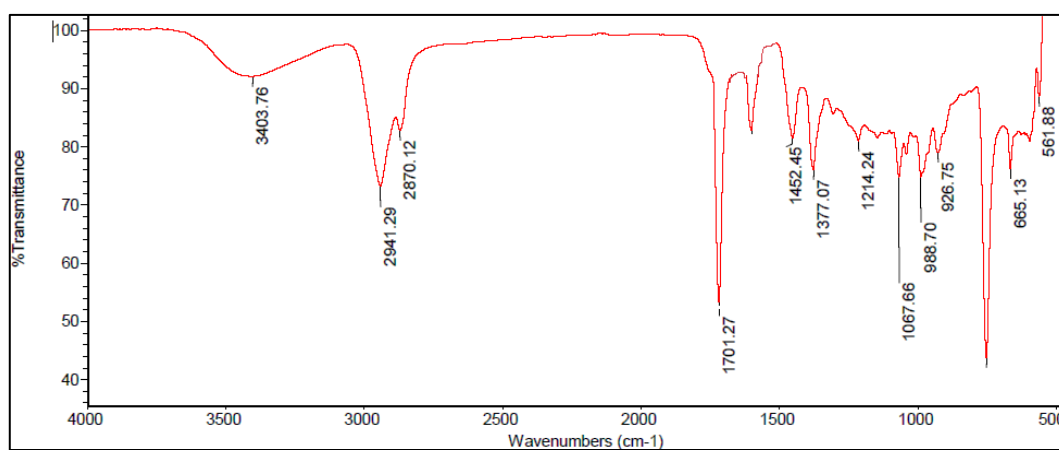

**Figure S36.**  $^1\text{H}$ -NMR Spectrum of **7** (500 MHz in  $\text{CDCl}_3$ ).

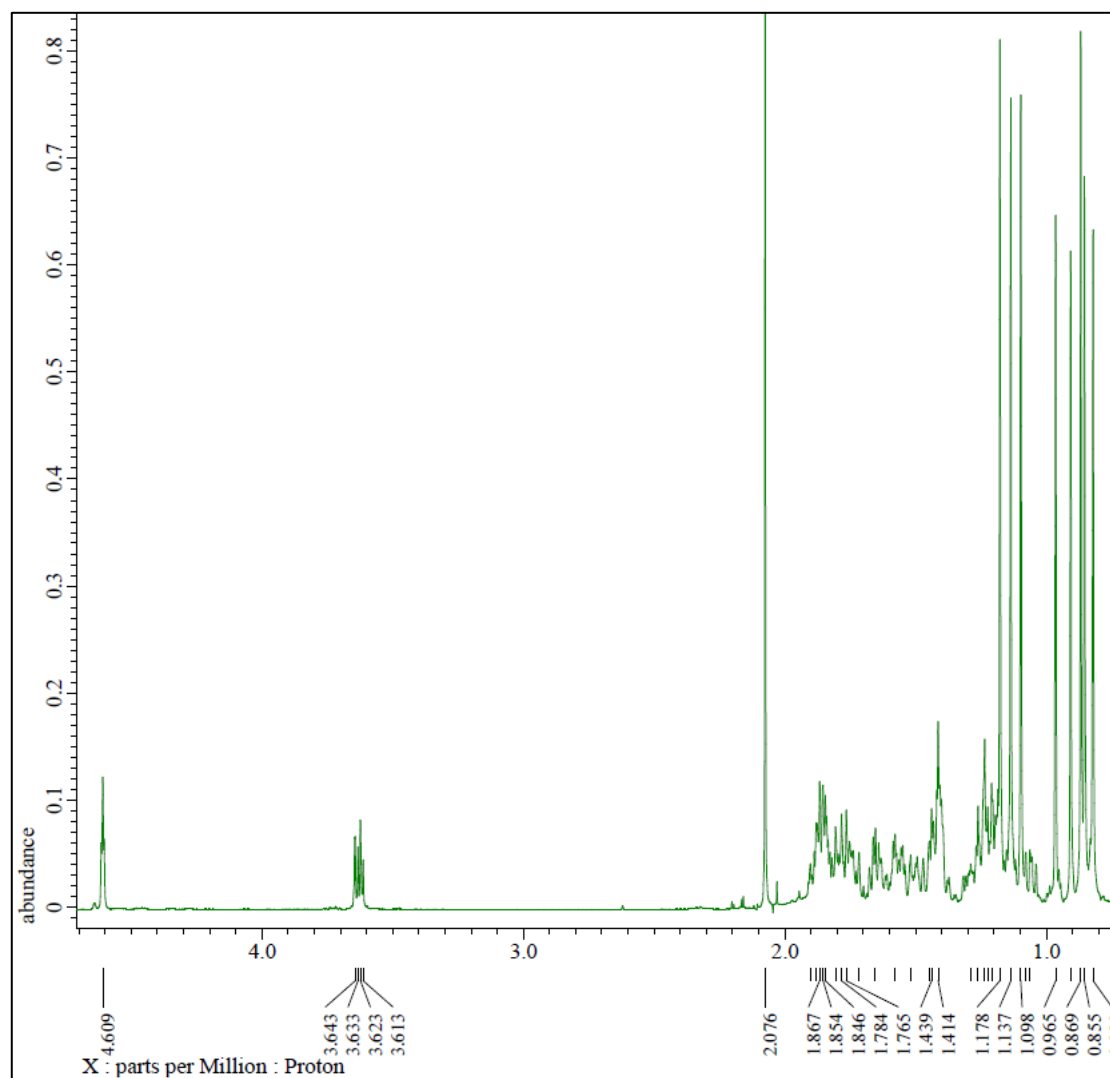

**Figure S37.**  $^{13}\text{C}$ -NMR and DEPT-135° Spectrum of **7** (125 MHz in  $\text{CDCl}_3$ ).

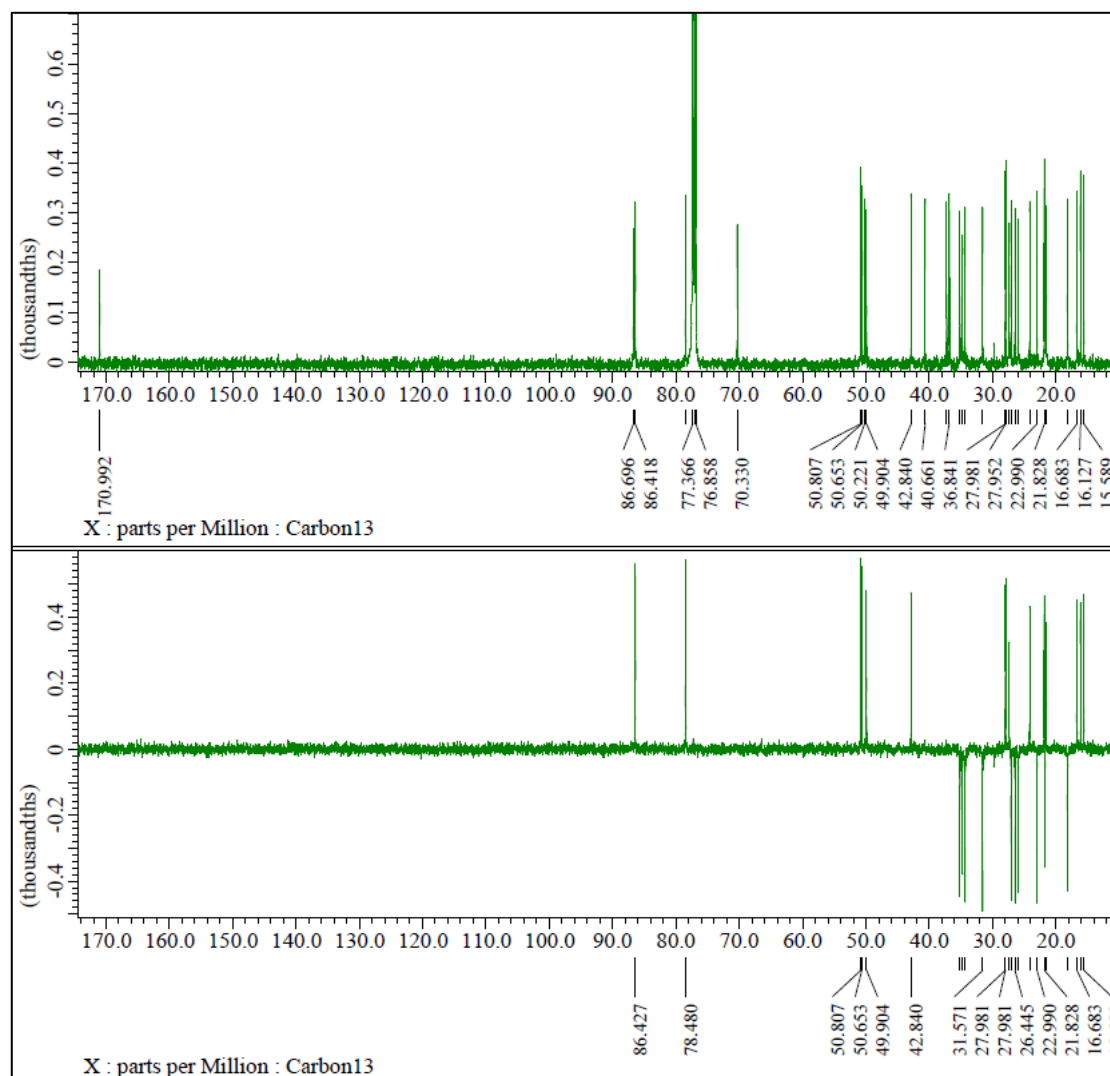



**Figure S38.** Results of cytotoxic activity of **1** against MCF-7 cell line.

|                          | Media   | Media+Cell | Cisplatin | DMSO<br>2,00% | Sample concentrations (µg/mL) |         |        |        |        |        |        |        |
|--------------------------|---------|------------|-----------|---------------|-------------------------------|---------|--------|--------|--------|--------|--------|--------|
|                          |         |            |           |               | 300.00                        | 150.00  | 75.00  | 37.50  | 18.75  | 9.38   | 4.69   | 2.34   |
| Absorbance<br>570nm      | 0.4499  | 0.7129     | 0.5763    | 0.6898        | 0.4461                        | 0.4495  | 0.5270 | 0.6792 | 0.7836 | 0.7261 | 0.7223 | 0.7040 |
|                          | 0.4585  | 0.6953     | 0.5720    | 0.7189        | 0.4649                        | 0.3713  | 0.4720 | 0.6561 | 0.6677 | 0.7268 | 0.6984 | 0.7247 |
| Absorbance<br>600nm      | 0.5814  | 0.2328     | 0.4878    | 0.2131        | 0.5641                        | 0.5759  | 0.4240 | 0.2393 | 0.2636 | 0.2287 | 0.2204 | 0.2159 |
|                          | 0.5950  | 0.2173     | 0.4902    | 0.2220        | 0.5952                        | 0.4749  | 0.3840 | 0.2311 | 0.2073 | 0.2255 | 0.2135 | 0.2290 |
| Absorbance<br>difference | -0.1315 | 0.4801     | 0.0885    | 0.4767        | -0.1180                       | -0.1264 | 0.1030 | 0.4399 | 0.5200 | 0.4974 | 0.5019 | 0.4881 |
|                          | -0.1365 | 0.4780     | 0.0818    | 0.4969        | -0.1303                       | -0.1036 | 0.0880 | 0.4250 | 0.4604 | 0.5013 | 0.4849 | 0.4957 |
| % live cell              |         | 98.92      | 35.84     | 98.37         | 2.58                          | 1.22    | 38.18  | 92.45  | 105.35 | 101.71 | 102.43 | 100.21 |
|                          |         | 98.58      | 34.76     | 101.63        | 0.60                          | 4.90    | 35.76  | 90.05  | 95.75  | 102.34 | 99.69  | 101.43 |
| Average %<br>live cell   |         | 98.75      | 35.30     | 100.00        | 1.59                          | 3.06    | 36.97  | 91.25  | 100.55 | 102.02 | 101.06 | 100.82 |
| SEM                      |         | 0.17       | 0.54      | 1.63          | 0.99                          | 1.84    | 1.21   | 1.20   | 4.80   | 0.31   | 1.37   | 0.61   |
| Normalize data           |         | 98.75      | 35.30     | 100.00        | 1.59                          | 3.06    | 36.97  | 91.25  | 100.55 | 102.02 | 101.06 | 100.82 |

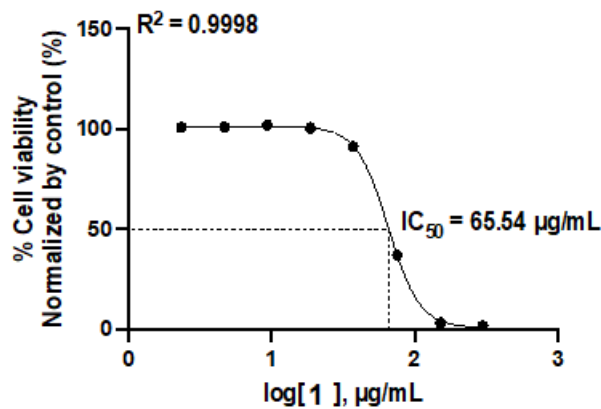

| Media                                                                                | Media +cell | Cisplatin | Solvent | Sample concentrations (µg/mL) |        |        |       |       |       |      |      |
|--------------------------------------------------------------------------------------|-------------|-----------|---------|-------------------------------|--------|--------|-------|-------|-------|------|------|
|                                                                                      |             |           |         | 500,00                        | 250,00 | 125,00 | 62,50 | 31,25 | 15,63 | 7,81 | 3,91 |
| 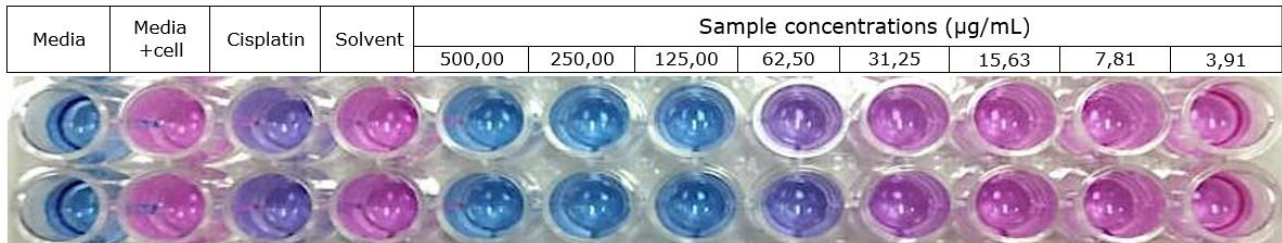 |             |           |         |                               |        |        |       |       |       |      |      |

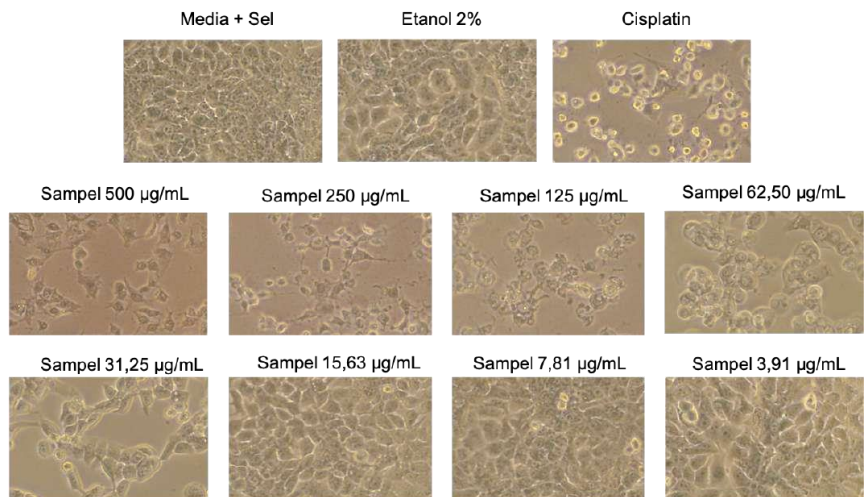

MCF-7 cell morphology at each concentration of compound **1**

**Figure S39.** Results of cytotoxic activity of **2** against MCF-7 cell line.

|                        | Media   | Media+Cell | Cisplatin | DMSO<br>2,00% | Sample concentrations (µg/mL) |         |         |        |        |        |        |        |
|------------------------|---------|------------|-----------|---------------|-------------------------------|---------|---------|--------|--------|--------|--------|--------|
|                        |         |            |           |               | 500.00                        | 250.00  | 125.00  | 62.50  | 31.25  | 15.63  | 7.81   | 3.91   |
| Absorbance             | 0.4213  | 0.7029     | 0.5601    | 0.7319        | 0.4407                        | 0.4270  | 0.4357  | 0.5889 | 0.6605 | 0.6873 | 0.6929 | 0.6916 |
| 570nm                  | 0.4246  | 0.6978     | 0.5420    | 0.7072        | 0.4430                        | 0.4295  | 0.4410  | 0.5324 | 0.6616 | 0.6898 | 0.6905 | 0.6930 |
| Absorbance             | 0.5432  | 0.2123     | 0.4377    | 0.2369        | 0.5633                        | 0.5444  | 0.5402  | 0.4000 | 0.2738 | 0.2240 | 0.2215 | 0.2114 |
| 600nm                  | 0.5484  | 0.2123     | 0.4406    | 0.2653        | 0.5660                        | 0.5473  | 0.5594  | 0.4546 | 0.3094 | 0.2385 | 0.2199 | 0.2113 |
| Absorbance             | -0.1219 | 0.4906     | 0.1224    | 0.4950        | -0.1226                       | -0.1174 | -0.1045 | 0.1889 | 0.3867 | 0.4633 | 0.4714 | 0.4802 |
| difference             | -0.1238 | 0.4855     | 0.1014    | 0.4419        | -0.1230                       | -0.1178 | -0.1184 | 0.0778 | 0.3522 | 0.4513 | 0.4706 | 0.4817 |
| % live cell            |         | 103.75     | 41.48     | 104.49        | 0.04                          | 0.92    | 3.10    | 52.72  | 86.17  | 99.13  | 100.50 | 101.99 |
|                        |         | 102.88     | 37.92     | 95.51         | -0.03                         | 0.85    | 0.75    | 33.93  | 80.34  | 97.10  | 100.36 | 102.24 |
| Average %<br>live cell |         | 103.31     | 39.70     | 100.00        | 0.01                          | 0.89    | 1.93    | 43.33  | 83.26  | 98.11  | 100.43 | 102.11 |
| SEM                    |         | 0.43       | 1.78      | 4.49          | 0.03                          | 0.03    | 1.18    | 9.39   | 2.92   | 1.01   | 0.07   | 0.13   |
| Normalize data         |         | 103.31     | 39.70     | 100.00        | 0.01                          | 0.89    | 1.93    | 43.33  | 83.26  | 98.11  | 100.43 | 102.11 |

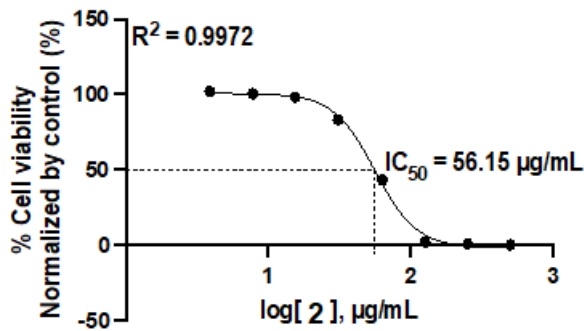

| Media                                                                                | Media +Cell | Cisplatin | Solvent | Sample concentrations (µg/mL) |        |       |       |       |      |      |      |
|--------------------------------------------------------------------------------------|-------------|-----------|---------|-------------------------------|--------|-------|-------|-------|------|------|------|
|                                                                                      |             |           |         | 300                           | 150,00 | 75,00 | 37,50 | 18,75 | 9,38 | 4,69 | 2,34 |
|  |             |           |         |                               |        |       |       |       |      |      |      |

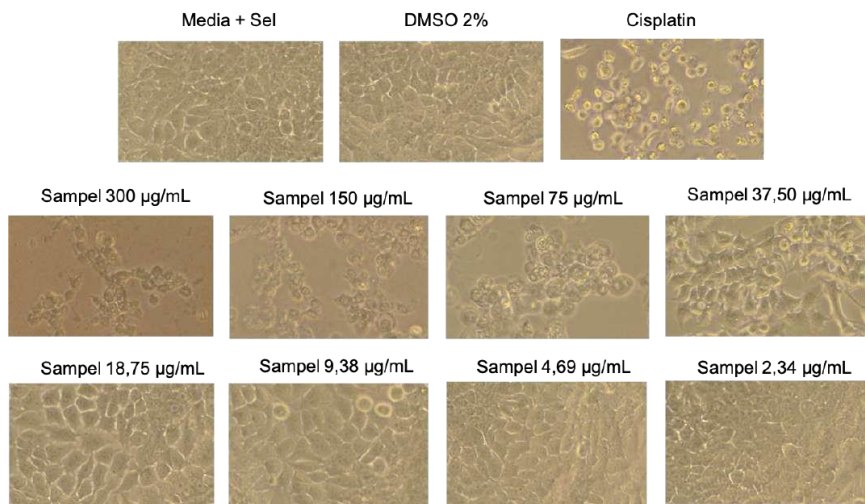

MCF-7 cell morphology at each concentration of compound **2**

**Figure S40.** Results of cytotoxic activity of **3** against MCF-7 cell line.

|                        | Media   | Media+Cell | Cisplatin | DMSO<br>2,00% | Sample concentrations (µg/mL) |         |        |        |        |        |        |        |
|------------------------|---------|------------|-----------|---------------|-------------------------------|---------|--------|--------|--------|--------|--------|--------|
|                        |         |            |           |               | 500.00                        | 250.00  | 125.00 | 62.50  | 31.25  | 15.63  | 7.81   | 3.91   |
| Absorbance             | 0.4184  | 0.7361     | 0.5164    | 0.7271        | 0.5020                        | 0.4571  | 0.6659 | 0.7166 | 0.7301 | 0.7249 | 0.6999 | 0.7463 |
| 570nm                  | 0.4279  | 0.7269     | 0.5190    | 0.7316        | 0.4924                        | 0.4761  | 0.6329 | 0.7409 | 0.7095 | 0.7233 | 0.7160 | 0.7042 |
| Absorbance             | 0.5337  | 0.1803     | 0.4928    | 0.1876        | 0.6193                        | 0.5687  | 0.3574 | 0.2605 | 0.2086 | 0.1863 | 0.1748 | 0.1904 |
| 600nm                  | 0.5457  | 0.1778     | 0.4769    | 0.1834        | 0.6024                        | 0.5620  | 0.3396 | 0.2262 | 0.1871 | 0.1830 | 0.1785 | 0.1746 |
| Absorbance             | -0.1153 | 0.5558     | 0.0236    | 0.5395        | -0.1173                       | -0.1116 | 0.3085 | 0.4561 | 0.5215 | 0.5386 | 0.5251 | 0.5559 |
| difference             | -0.1178 | 0.5491     | 0.0421    | 0.5482        | -0.1100                       | -0.0859 | 0.2933 | 0.5147 | 0.5224 | 0.5403 | 0.5375 | 0.5296 |
| % live cell            |         | 101.81     | 21.22     | 99.34         | -0.11                         | 0.75    | 64.36  | 86.71  | 96.62  | 99.21  | 97.16  | 101.82 |
|                        |         | 100.79     | 24.02     | 100.66        | 0.99                          | 4.64    | 62.06  | 95.59  | 96.75  | 99.46  | 99.04  | 97.84  |
| Average %<br>live cell |         | 101.30     | 22.62     | 100.00        | 0.44                          | 2.70    | 63.21  | 91.15  | 96.68  | 99.33  | 98.10  | 99.83  |
| SEM                    |         | 0.51       | 1.40      | 0.66          | 0.55                          | 1.95    | 1.15   | 4.44   | 0.07   | 0.13   | 0.94   | 1.99   |
| Normalize<br>data      |         | 101.30     | 22.62     | 100.00        | 0.44                          | 2.70    | 63.21  | 91.15  | 96.68  | 99.33  | 98.10  | 99.83  |

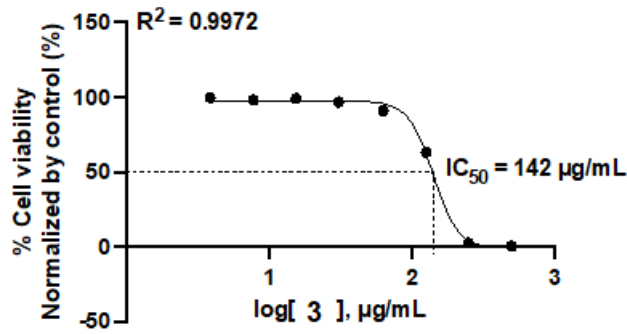

| Media                                                                                | Media +cell | Cisplatin | Solvent | Sample concentrations (µg/mL) |        |        |       |       |       |      |      |
|--------------------------------------------------------------------------------------|-------------|-----------|---------|-------------------------------|--------|--------|-------|-------|-------|------|------|
|                                                                                      |             |           |         | 500,00                        | 250,00 | 125,00 | 62,50 | 31,25 | 15,63 | 7,81 | 3,91 |
|  |             |           |         |                               |        |        |       |       |       |      |      |

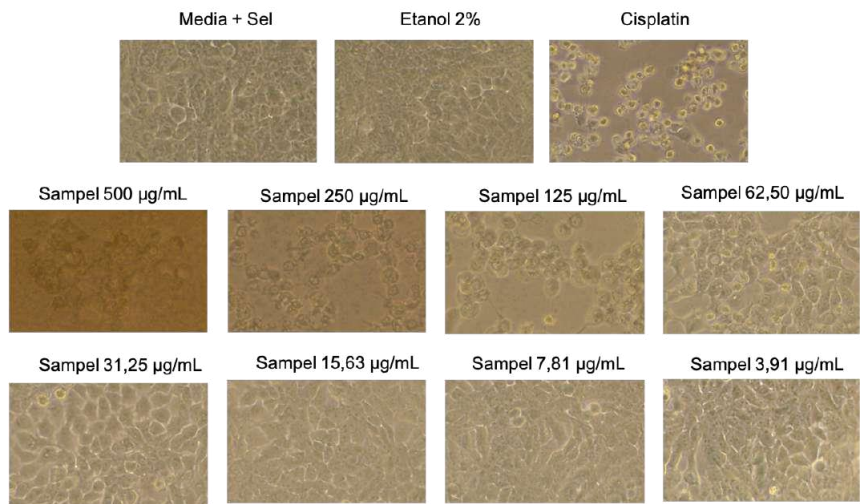

MCF-7 cell morphology at each concentration of compound **3**



**Figure S41.** Results of cytotoxic activity of **4** against MCF-7 cell line.

|                          | Media   | Media+Cell | Cisplatin | DMSO<br>2,00% | Sample concentrations (µg/mL) |        |        |        |        |        |        |        |
|--------------------------|---------|------------|-----------|---------------|-------------------------------|--------|--------|--------|--------|--------|--------|--------|
|                          |         |            |           |               | 500.00                        | 250.00 | 125.00 | 62.50  | 31.25  | 15.63  | 7.81   | 3.91   |
| Absorbance<br>570nm      | 0.4267  | 0.7354     | 0.546     | 0.7267        | 0.6523                        | 0.7451 | 0.7266 | 0.7583 | 0.7172 | 0.7282 | 0.7315 | 0.7167 |
|                          | 0.4305  | 0.735      | 0.5434    | 0.7386        | 0.6757                        | 0.7484 | 0.7262 | 0.7227 | 0.7275 | 0.7218 | 0.7063 | 0.728  |
| Absorbance<br>600nm      | 0.5443  | 0.1818     | 0.4777    | 0.1825        | 0.381                         | 0.2304 | 0.2009 | 0.1998 | 0.1857 | 0.1819 | 0.1819 | 0.1786 |
|                          | 0.5485  | 0.1815     | 0.4632    | 0.1828        | 0.3633                        | 0.2174 | 0.1945 | 0.1841 | 0.1883 | 0.1798 | 0.1774 | 0.1821 |
| Absorbance<br>difference | -0.1176 | 0.5536     | 0.0683    | 0.5442        | 0.2713                        | 0.5147 | 0.5257 | 0.5585 | 0.5315 | 0.5463 | 0.5496 | 0.5381 |
|                          | -0.1180 | 0.5535     | 0.0802    | 0.5558        | 0.3124                        | 0.5310 | 0.5317 | 0.5386 | 0.5392 | 0.5420 | 0.5289 | 0.5459 |
| % live cell              |         | 100.54     | 27.87     | 99.13         | 58.27                         | 94.71  | 96.36  | 101.27 | 97.23  | 99.45  | 99.94  | 98.22  |
|                          |         | 100.52     | 29.65     | 100.87        | 64.42                         | 97.15  | 97.26  | 98.29  | 98.38  | 98.80  | 96.84  | 99.39  |
| Average %<br>live cell   |         | 100.53     | 28.76     | 100.00        | 61.34                         | 95.93  | 96.81  | 99.78  | 97.81  | 99.12  | 98.39  | 98.80  |
| SEM                      |         | 0.01       | 0.89      | 0.87          | 3.08                          | 1.22   | 0.45   | 1.49   | 0.58   | 0.32   | 1.55   | 0.58   |
| Normalize<br>data        |         | 100.53     | 28.76     | 100.00        | 61.34                         | 95.93  | 96.81  | 99.78  | 97.81  | 99.12  | 98.39  | 98.80  |

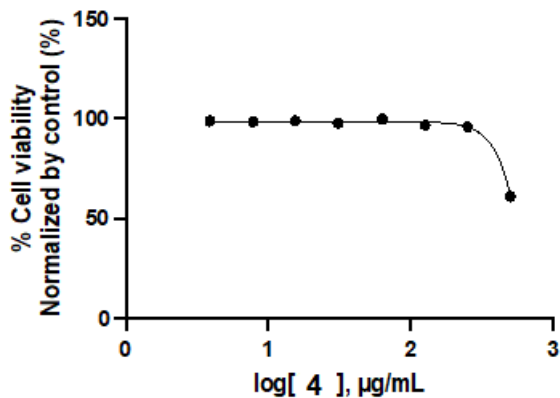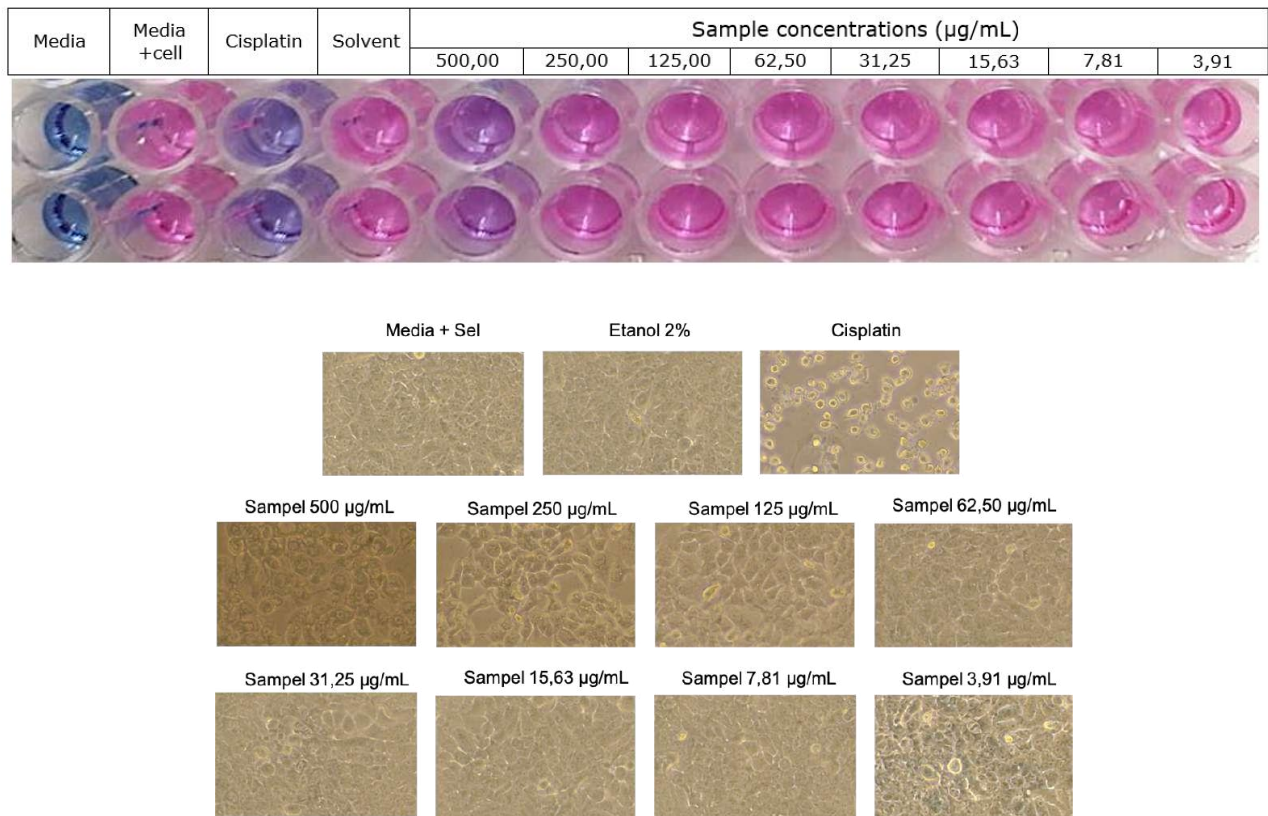

MCF-7 cell morphology at each concentration of compound **4**

**Figure S42.** Results of cytotoxic activity of **5** against MCF-7 cell line.

|                             | Media   | Media + cell | Cisplatin | Solvent | Sample concentrations (µg/mL) |        |        |        |        |        |         |         |
|-----------------------------|---------|--------------|-----------|---------|-------------------------------|--------|--------|--------|--------|--------|---------|---------|
|                             |         |              |           |         | 2,34                          | 4,69   | 9,38   | 18,75  | 37,50  | 75,00  | 150,00  | 300,00  |
| Absorbance 570nm            | 0,4706  | 0,7728       | 0,5746    | 0,7568  | 0,7833                        | 0,7678 | 0,7578 | 0,7323 | 0,7316 | 0,5663 | 0,4709  | 0,4640  |
|                             | 0,4842  | 0,7666       | 0,5718    | 0,7562  | 0,7754                        | 0,7728 | 0,7657 | 0,7419 | 0,7088 | 0,5703 | 0,4761  | 0,5014  |
| Absorbance 600nm            | 0,6023  | 0,2352       | 0,5244    | 0,2838  | 0,2467                        | 0,2531 | 0,2642 | 0,2845 | 0,3246 | 0,5133 | 0,5965  | 0,5893  |
|                             | 0,6201  | 0,2342       | 0,5277    | 0,2782  | 0,2450                        | 0,2531 | 0,2723 | 0,3026 | 0,3629 | 0,5189 | 0,6023  | 0,6325  |
| Absorbance difference       | -0,1317 | 0,5376       | 0,0502    | 0,4730  | 0,5366                        | 0,5147 | 0,4936 | 0,4478 | 0,4070 | 0,0530 | -0,1256 | -0,1253 |
|                             | -0,1359 | 0,5324       | 0,0441    | 0,4780  | 0,5304                        | 0,5197 | 0,4934 | 0,4393 | 0,3459 | 0,0514 | -0,1262 | -0,1311 |
| % live cell                 |         | 110,19       | 30,20     | 99,59   | 110,03                        | 106,43 | 102,97 | 95,45  | 88,76  | 30,66  | 1,35    | 1,40    |
|                             |         | 109,34       | 29,20     | 100,41  | 109,01                        | 107,25 | 102,94 | 94,06  | 78,73  | 30,40  | 1,25    | 0,44    |
| Average % live cell         |         | 109,77       | 29,70     | 100,00  | 109,52                        | 106,84 | 102,95 | 94,76  | 83,74  | 30,53  | 1,30    | 0,92    |
| SEM                         |         | 0,43         | 0,50      | 0,41    | 0,51                          | 0,41   | 0,02   | 0,70   | 5,01   | 0,13   | 0,05    | 0,48    |
| Normalized data % live cell |         | 109,77       | 29,70     | 100,00  | 109,52                        | 106,84 | 102,95 | 94,76  | 83,74  | 30,53  | 1,30    | 0,92    |

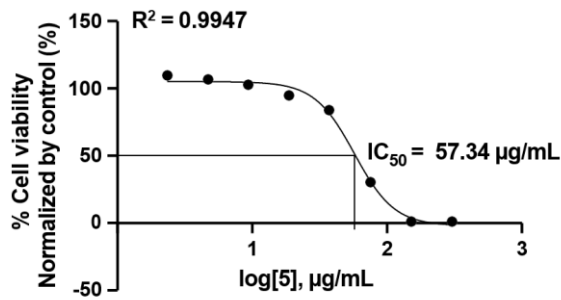

| Media                                                                                | Media +cell | Cisplatin | Solvent | Sample concentrations (µg/mL) |      |      |       |       |       |        |        |
|--------------------------------------------------------------------------------------|-------------|-----------|---------|-------------------------------|------|------|-------|-------|-------|--------|--------|
|                                                                                      |             |           |         | 2,34                          | 4,69 | 9,38 | 18,75 | 37,50 | 75,00 | 150,00 | 300,00 |
|  |             |           |         |                               |      |      |       |       |       |        |        |

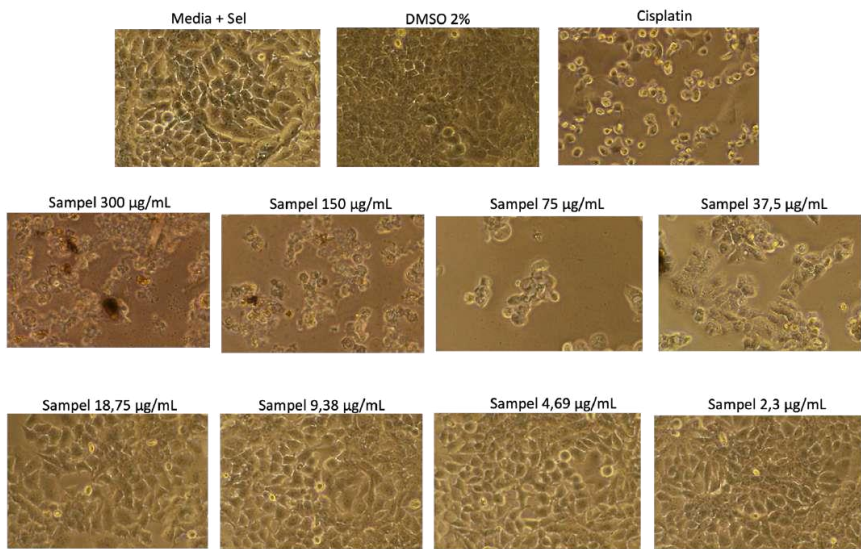

MCF-7 cell morphology at each concentration of compound **5**

**Figure S43.** Results of cytotoxic activity of **6** against MCF-7 cell line.

|                             | Media   | Media + cell | Cisplatin | Solvent | Sample concentrations (µg/mL) |        |        |        |        |        |        |         |
|-----------------------------|---------|--------------|-----------|---------|-------------------------------|--------|--------|--------|--------|--------|--------|---------|
|                             |         |              |           |         | 2,34                          | 4,69   | 9,38   | 18,75  | 37,50  | 75,00  | 150,00 | 300,00  |
| Absorbance 570nm            | 0,4756  | 0,7769       | 0,5661    | 0,7535  | 0,7673                        | 0,7584 | 0,7799 | 0,7670 | 0,7051 | 0,6611 | 0,6010 | 0,5074  |
|                             | 0,4961  | 0,7783       | 0,5699    | 0,7509  | 0,7678                        | 0,7539 | 0,7754 | 0,7505 | 0,5997 | 0,6806 | 0,6265 | 0,4938  |
| Absorbance 600nm            | 0,6079  | 0,2388       | 0,5239    | 0,2793  | 0,2381                        | 0,2313 | 0,2517 | 0,2676 | 0,2935 | 0,4269 | 0,5192 | 0,6099  |
|                             | 0,6319  | 0,2364       | 0,5260    | 0,3143  | 0,2452                        | 0,2485 | 0,2603 | 0,2644 | 0,2166 | 0,4299 | 0,5100 | 0,6108  |
| Absorbance difference       | -0,1323 | 0,5381       | 0,0422    | 0,4742  | 0,5292                        | 0,5271 | 0,5282 | 0,4994 | 0,4116 | 0,2342 | 0,0818 | -0,1025 |
|                             | -0,1358 | 0,5419       | 0,0439    | 0,4366  | 0,5226                        | 0,5054 | 0,5151 | 0,4861 | 0,3831 | 0,2507 | 0,1165 | -0,1170 |
| % live cell                 |         | 114,03       | 29,90     | 103,19  | 112,52                        | 112,16 | 112,35 | 107,46 | 92,57  | 62,47  | 36,62  | 5,35    |
|                             |         | 114,67       | 30,19     | 96,81   | 111,40                        | 108,48 | 110,13 | 105,21 | 87,73  | 65,27  | 42,51  | 2,89    |
| Average % live cell         |         | 114,35       | 30,04     | 100,00  | 111,96                        | 110,32 | 111,24 | 106,34 | 90,15  | 63,87  | 39,56  | 4,12    |
| SEM                         |         | 0,32         | 0,14      | 3,19    | 0,56                          | 1,84   | 1,11   | 1,13   | 2,42   | 1,40   | 2,94   | 1,23    |
| Normalized data % live cell |         | 114,35       | 30,04     | 100,00  | 111,96                        | 110,32 | 111,24 | 106,34 | 90,15  | 63,87  | 39,56  | 4,12    |

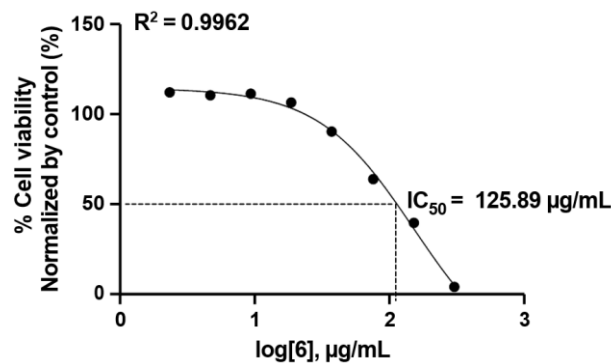

| Media                                                                                | Media +cell | Cisplatin | Solvent | Sample concentrations (µg/mL) |      |      |       |       |       |        |
|--------------------------------------------------------------------------------------|-------------|-----------|---------|-------------------------------|------|------|-------|-------|-------|--------|
|                                                                                      |             |           |         | 2,34                          | 4,69 | 9,38 | 18,75 | 37,50 | 75,00 | 150,00 |
|  |             |           |         |                               |      |      |       |       |       |        |

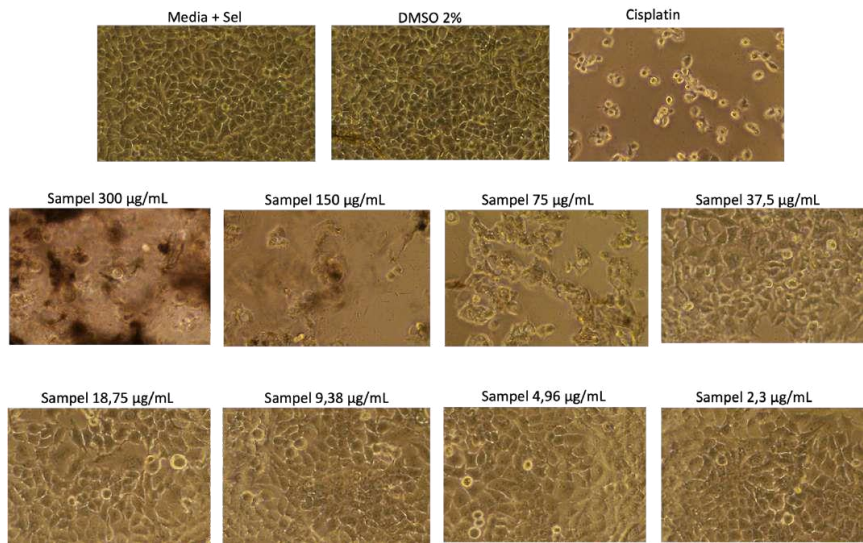

MCF-7 cell morphology at each concentration of compound **6**



**Figure S44.** Results of cytotoxic activity of **7** against MCF-7 cell line.

|                             | Media   | Media + cell | Cisplatin | Solvent | Sample concentrations (µg/mL) |        |        |        |        |        |         |         |
|-----------------------------|---------|--------------|-----------|---------|-------------------------------|--------|--------|--------|--------|--------|---------|---------|
|                             |         |              |           |         | 2,34                          | 4,69   | 9,38   | 18,75  | 37,50  | 75,00  | 150,00  | 300,00  |
| Absorbance 570nm            | 0,4693  | 0,7481       | 0,5716    | 0,7565  | 0,7825                        | 0,7779 | 0,7556 | 0,7436 | 0,7284 | 0,6887 | 0,5271  | 0,4850  |
|                             | 0,4886  | 0,7770       | 0,5703    | 0,7580  | 0,7592                        | 0,7694 | 0,7567 | 0,7374 | 0,7153 | 0,7010 | 0,5306  | 0,4951  |
| Absorbance 600nm            | 0,6010  | 0,2242       | 0,5216    | 0,2728  | 0,2356                        | 0,2420 | 0,2364 | 0,2434 | 0,2978 | 0,3639 | 0,5485  | 0,6092  |
|                             | 0,6225  | 0,2337       | 0,5218    | 0,2929  | 0,2314                        | 0,2465 | 0,2318 | 0,2723 | 0,3080 | 0,3872 | 0,5937  | 0,6355  |
| Absorbance difference       | -0,1317 | 0,5239       | 0,0500    | 0,4837  | 0,5469                        | 0,5359 | 0,5192 | 0,5002 | 0,4306 | 0,3248 | -0,0214 | -0,1242 |
|                             | -0,1339 | 0,5433       | 0,0485    | 0,4651  | 0,5278                        | 0,5229 | 0,5249 | 0,4651 | 0,4073 | 0,3138 | -0,0631 | -0,1404 |
| % live cell                 |         | 108,15       | 30,11     | 101,53  | 111,94                        | 110,13 | 107,38 | 104,25 | 92,79  | 75,36  | 18,35   | 1,42    |
|                             |         | 111,35       | 29,86     | 98,47   | 108,79                        | 107,99 | 108,32 | 98,47  | 88,95  | 73,55  | 11,48   | -1,25   |
| Average % live cell         |         | 109,75       | 29,98     | 100,00  | 110,37                        | 109,06 | 107,85 | 101,36 | 90,87  | 74,46  | 14,91   | 0,08    |
| SEM                         |         | 1,60         | 0,12      | 1,53    | 1,57                          | 1,07   | 0,47   | 2,89   | 1,92   | 0,91   | 3,43    | 1,33    |
| Normalized data % live cell |         | 109,75       | 29,98     | 100,00  | 110,37                        | 109,06 | 107,85 | 101,36 | 90,87  | 74,46  | 14,91   | 0,08    |

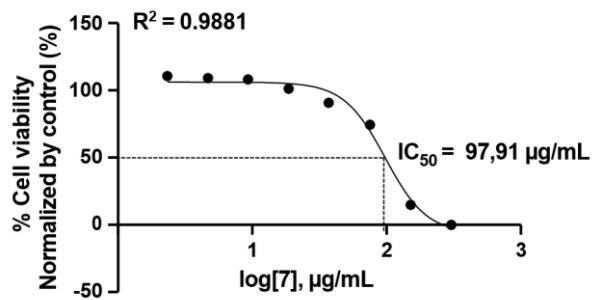

| Media                                                                                | Media +cell | Cisplatin | Solvent | Sample concentrations (µg/mL) |      |      |       |       |       |        |        |
|--------------------------------------------------------------------------------------|-------------|-----------|---------|-------------------------------|------|------|-------|-------|-------|--------|--------|
|                                                                                      |             |           |         | 2,34                          | 4,69 | 9,38 | 18,75 | 37,50 | 75,00 | 150,00 | 300,00 |
|  |             |           |         |                               |      |      |       |       |       |        |        |

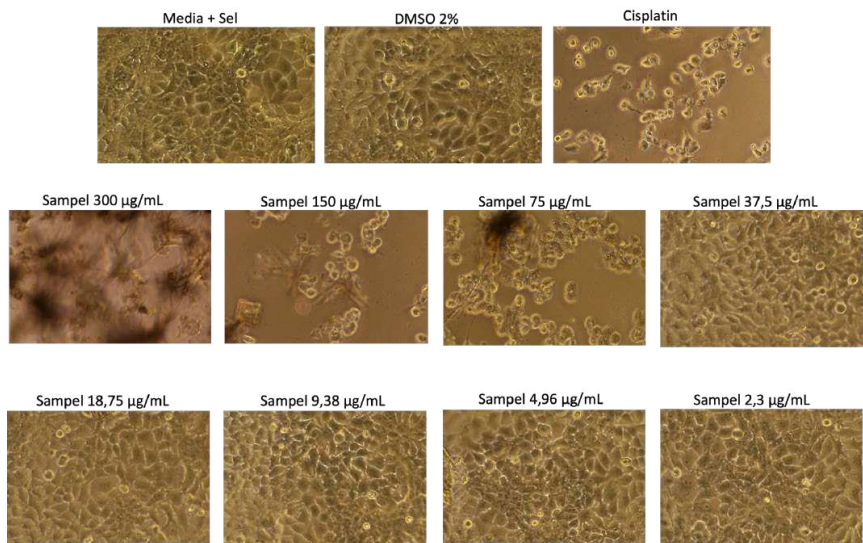

MCF-7 cell morphology at each concentration of compound **7**

Figure S45. Results of cytotoxic activity of **1** against B16-F10 cell line.

|                             | Media   | Media + cell | Cisplatin | Solvent | Sample concentrations (µg/mL) |        |        |        |        |         |         |         |
|-----------------------------|---------|--------------|-----------|---------|-------------------------------|--------|--------|--------|--------|---------|---------|---------|
|                             |         |              |           |         | 2,34                          | 4,69   | 9,38   | 18,75  | 37,50  | 75,00   | 150,00  | 300,00  |
| Absorbance 570nm            | 0,4740  | 0,8303       | 0,5658    | 0,7732  | 0,8008                        | 0,8332 | 0,8115 | 0,7873 | 0,7135 | 0,5146  | 0,4995  | 0,5000  |
|                             | 0,4868  | 0,7935       | 0,5606    | 0,7750  | 0,8084                        | 0,8181 | 0,8023 | 0,7869 | 0,7186 | 0,5299  | 0,5090  | 0,4896  |
| Absorbance 600nm            | 0,5998  | 0,2586       | 0,5273    | 0,2734  | 0,2661                        | 0,2622 | 0,2513 | 0,2510 | 0,3629 | 0,5810  | 0,6237  | 0,6243  |
|                             | 0,6178  | 0,2801       | 0,5600    | 0,2767  | 0,2595                        | 0,2602 | 0,2566 | 0,2472 | 0,3699 | 0,6018  | 0,6376  | 0,6129  |
| Absorbance difference       | -0,1258 | 0,5717       | 0,0385    | 0,4998  | 0,5347                        | 0,5710 | 0,5602 | 0,5363 | 0,3506 | -0,0664 | -0,1242 | -0,1243 |
|                             | -0,1310 | 0,5134       | 0,0006    | 0,4983  | 0,5489                        | 0,5579 | 0,5457 | 0,5397 | 0,3487 | -0,0719 | -0,1286 | -0,1233 |
| % live cell                 |         | 111,58       | 26,60     | 100,12  | 105,68                        | 111,47 | 109,75 | 105,94 | 76,34  | 9,88    | 0,67    | 0,65    |
|                             |         | 102,29       | 20,56     | 99,88   | 107,94                        | 109,38 | 107,43 | 106,48 | 76,04  | 9,00    | -0,03   | 0,81    |
| Average % live cell         |         | 106,93       | 23,58     | 100,00  | 106,81                        | 110,42 | 108,59 | 106,21 | 76,19  | 9,44    | 0,32    | 0,73    |
| SEM                         |         | 4,65         | 3,02      | 0,12    | 1,13                          | 1,04   | 1,16   | 0,27   | 0,15   | 0,44    | 0,35    | 0,08    |
| Normalized data % live cell |         | 106,93       | 23,58     | 100,00  | 106,81                        | 110,42 | 108,59 | 106,21 | 76,19  | 9,44    | 0,32    | 0,73    |

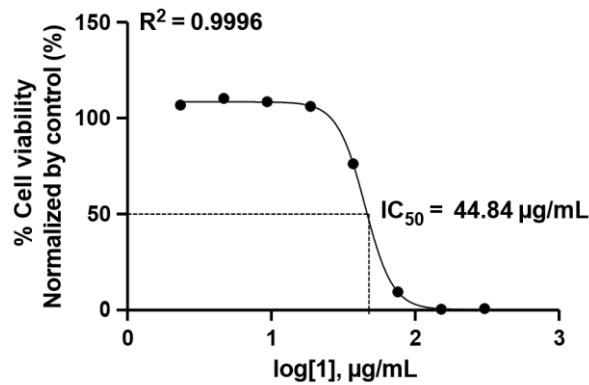

| Media                                                                                | Media +cell | Cisplatin | Solvent | Sample concentrations (µg/mL) |      |      |       |       |       |        |        |
|--------------------------------------------------------------------------------------|-------------|-----------|---------|-------------------------------|------|------|-------|-------|-------|--------|--------|
|                                                                                      |             |           |         | 2,34                          | 4,69 | 9,38 | 18,75 | 37,50 | 75,00 | 150,00 | 300,00 |
|  |             |           |         |                               |      |      |       |       |       |        |        |

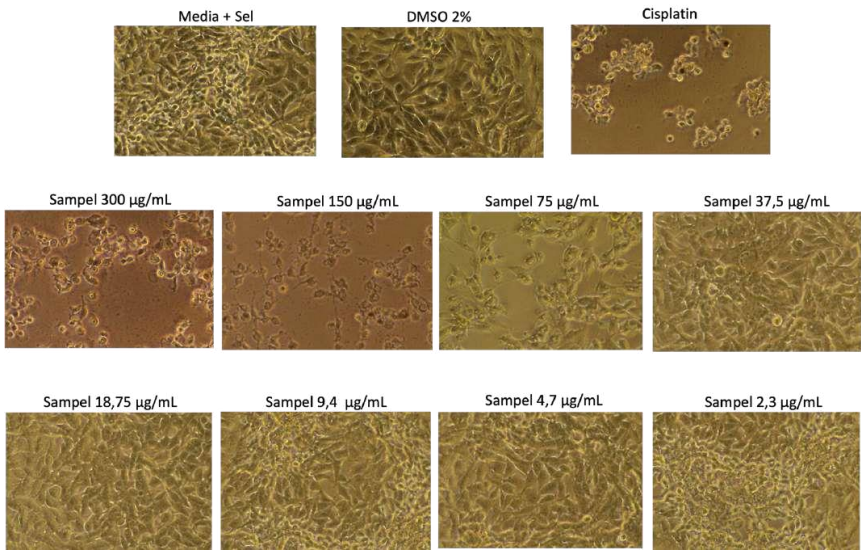

B16-F10 cell morphology at each concentration of compound **1**



**Figure S46.** Results of cytotoxic activity of **2** against B16-F10 cell line.

|                             | Media   | Media + cell | Cisplatin | Solvent | Sample concentrations (µg/mL) |        |        |        |        |         |         |         |
|-----------------------------|---------|--------------|-----------|---------|-------------------------------|--------|--------|--------|--------|---------|---------|---------|
|                             |         |              |           |         | 2,34                          | 4,69   | 9,38   | 18,75  | 37,50  | 75,00   | 150,00  | 300,00  |
| Absorbance 570nm            | 0,3298  | 0,5262       | 0,3541    | 0,5074  | 0,5555                        | 0,5501 | 0,5502 | 0,5308 | 0,5103 | 0,3734  | 0,3537  | 0,3510  |
|                             | 0,3429  | 0,5442       | 0,3610    | 0,5103  | 0,5432                        | 0,5559 | 0,5944 | 0,5297 | 0,5093 | 0,4019  | 0,3661  | 0,3515  |
| Absorbance 600nm            | 0,3880  | 0,2086       | 0,4036    | 0,2196  | 0,2112                        | 0,2087 | 0,2053 | 0,1906 | 0,2217 | 0,3771  | 0,4089  | 0,4047  |
|                             | 0,4026  | 0,2030       | 0,4009    | 0,2184  | 0,2110                        | 0,2072 | 0,2150 | 0,1918 | 0,2098 | 0,3695  | 0,4185  | 0,4017  |
| Absorbance difference       | -0,0582 | 0,3176       | -0,0495   | 0,2878  | 0,3443                        | 0,3414 | 0,3449 | 0,3402 | 0,2886 | -0,0037 | -0,0552 | -0,0537 |
|                             | -0,0597 | 0,3412       | -0,0399   | 0,2919  | 0,3322                        | 0,3487 | 0,3794 | 0,3379 | 0,2995 | 0,0324  | -0,0524 | -0,0502 |
| % live cell                 |         | 107,96       | 2,71      | 99,41   | 115,61                        | 114,78 | 115,78 | 114,44 | 99,64  | 15,84   | 1,08    | 1,51    |
|                             |         | 114,72       | 5,46      | 100,59  | 112,14                        | 116,87 | 125,67 | 113,78 | 102,77 | 26,19   | 1,88    | 2,51    |
| Average % live cell         |         | 111,34       | 4,09      | 100,00  | 113,88                        | 115,83 | 120,73 | 114,11 | 101,20 | 21,01   | 1,48    | 2,01    |
| SEM                         |         | 3,38         | 1,38      | 0,59    | 1,73                          | 1,05   | 4,95   | 0,33   | 1,56   | 5,17    | 0,40    | 0,50    |
| Normalized data % live cell |         | 111,34       | 4,09      | 100,00  | 113,88                        | 115,83 | 120,73 | 114,11 | 101,20 | 21,01   | 1,48    | 2,01    |

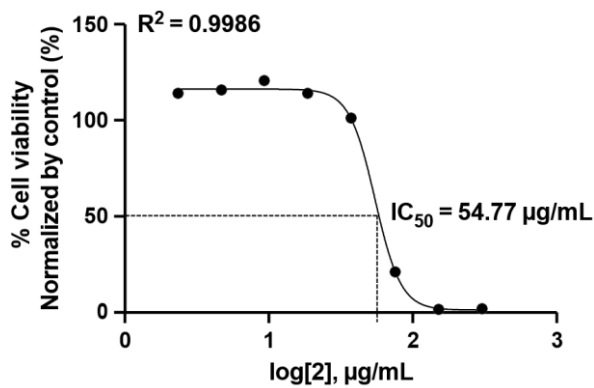

| Media                                                                                | Media +cell | Cisplatin | Solvent | Sample concentrations (µg/mL) |      |      |       |       |       |        |        |
|--------------------------------------------------------------------------------------|-------------|-----------|---------|-------------------------------|------|------|-------|-------|-------|--------|--------|
|                                                                                      |             |           |         | 2,34                          | 4,69 | 9,38 | 18,75 | 37,50 | 75,00 | 150,00 | 300,00 |
|  |             |           |         |                               |      |      |       |       |       |        |        |

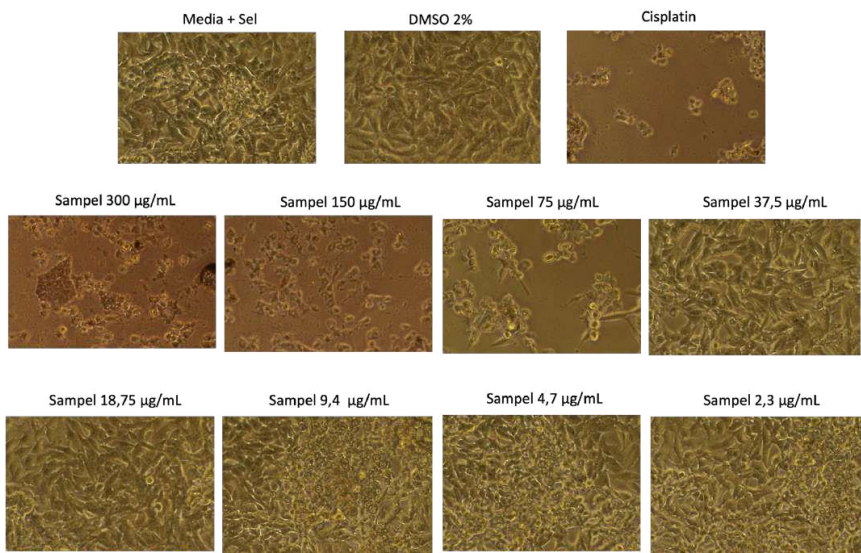

B16-F10 cell morphology at each concentration of compound **2**

**Figure S47.** Results of cytotoxic activity of **3** against B16-F10 cell line.

|                             | Media   | Media + cell | Cisplatin | Solvent | Sample concentrations (µg/mL) |        |        |        |        |         |         |         |
|-----------------------------|---------|--------------|-----------|---------|-------------------------------|--------|--------|--------|--------|---------|---------|---------|
|                             |         |              |           |         | 2,34                          | 4,69   | 9,38   | 18,75  | 37,50  | 75,00   | 150,00  | 300,00  |
| Absorbance 570nm            | 0,4350  | 0,7556       | 0,6233    | 0,7508  | 0,7565                        | 0,7121 | 0,7175 | 0,7637 | 0,7275 | 0,4970  | 0,5186  | 0,5010  |
|                             | 0,4505  | 0,7470       | 0,5993    | 0,7526  | 0,7005                        | 0,7952 | 0,7523 | 0,7182 | 0,7569 | 0,4965  | 0,5574  | 0,4966  |
| Absorbance 600nm            | 0,5490  | 0,2919       | 0,4025    | 0,2771  | 0,3405                        | 0,3734 | 0,3831 | 0,3505 | 0,4008 | 0,6142  | 0,6433  | 0,6308  |
|                             | 0,5662  | 0,2662       | 0,4239    | 0,2642  | 0,3929                        | 0,3201 | 0,3289 | 0,3634 | 0,3690 | 0,6165  | 0,6626  | 0,6316  |
| Absorbance difference       | -0,1140 | 0,4637       | 0,2208    | 0,4737  | 0,4160                        | 0,3387 | 0,3344 | 0,4132 | 0,3267 | -0,1172 | -0,1247 | -0,1298 |
|                             | -0,1157 | 0,4808       | 0,1754    | 0,4884  | 0,3076                        | 0,4751 | 0,4234 | 0,3548 | 0,3879 | -0,1200 | -0,1052 | -0,1350 |
| % live cell                 |         | 98,54        | 57,17     | 100,25  | 90,42                         | 77,25  | 76,52  | 89,94  | 75,21  | -0,40   | -1,68   | -2,55   |
|                             |         | 101,46       | 49,44     | 102,75  | 71,96                         | 100,49 | 91,68  | 79,99  | 85,63  | -0,88   | 1,64    | -3,43   |
| Average % live cell         |         | 100,00       | 53,30     | 101,50  | 81,19                         | 88,87  | 84,10  | 84,97  | 80,42  | -0,64   | -0,02   | -2,99   |
| SEM                         |         | 1,46         | 3,87      | 1,25    | 9,23                          | 11,62  | 7,58   | 4,97   | 5,21   | 0,24    | 1,66    | 0,44    |
| Normalized data % live cell |         | 98,52        | 52,52     | 100,00  | 79,99                         | 87,56  | 82,86  | 83,71  | 79,23  | -0,63   | -0,02   | -2,95   |

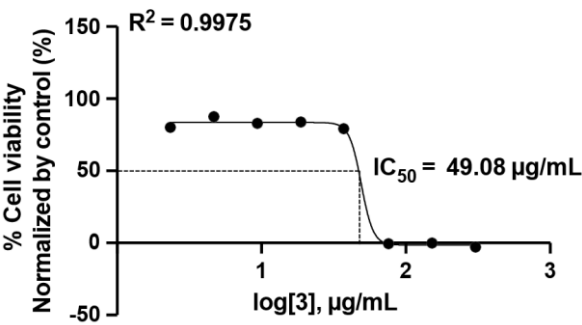

| Media                                                                                | Media +cell | Cisplatin | Solvent | Sample concentrations (µg/mL) |      |      |       |       |       |        |        |
|--------------------------------------------------------------------------------------|-------------|-----------|---------|-------------------------------|------|------|-------|-------|-------|--------|--------|
|                                                                                      |             |           |         | 2,34                          | 4,69 | 9,38 | 18,75 | 37,50 | 75,00 | 150,00 | 300,00 |
|  |             |           |         |                               |      |      |       |       |       |        |        |

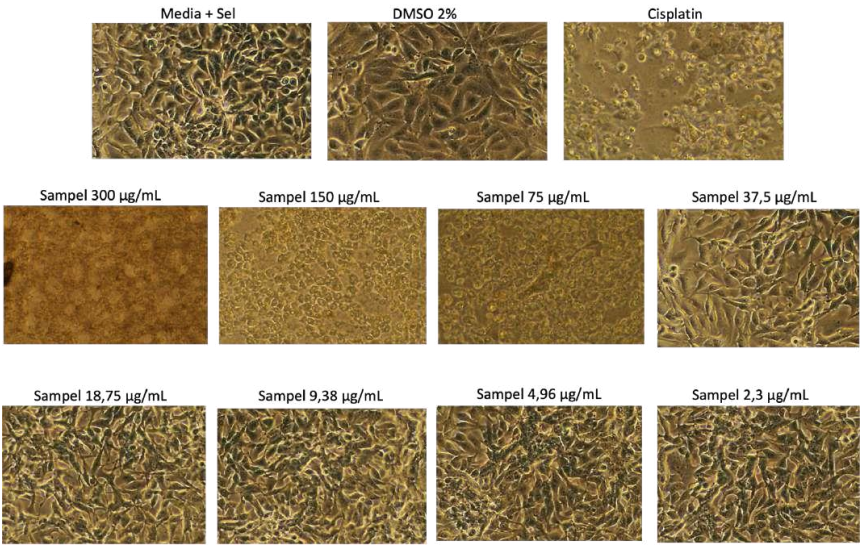

B16-F10 cell morphology at each concentration of compound **3**



**Figure S48.** Results of cytotoxic activity of **4** against B16-F10 cell line.

|                             | Media   | Media + cell | Cisplatin | Solvent | Sample concentrations (µg/mL) |        |        |        |        |        |        |         |
|-----------------------------|---------|--------------|-----------|---------|-------------------------------|--------|--------|--------|--------|--------|--------|---------|
|                             |         |              |           |         | 2,34                          | 4,69   | 9,38   | 18,75  | 37,50  | 75,00  | 150,00 | 300,00  |
| Absorbance 570nm            | 0,4350  | 0,7556       | 0,6233    | 0,7508  | 0,7646                        | 0,6342 | 0,6616 | 0,7139 | 0,7212 | 0,7322 | 0,7312 | 0,5145  |
|                             | 0,4505  | 0,7470       | 0,5993    | 0,7526  | 0,6985                        | 0,6452 | 0,6456 | 0,7058 | 0,691  | 0,7509 | 0,7442 | 0,5188  |
| Absorbance 600nm            | 0,5490  | 0,2919       | 0,4025    | 0,2771  | 0,3509                        | 0,4202 | 0,419  | 0,3901 | 0,3664 | 0,362  | 0,3704 | 0,6063  |
|                             | 0,5662  | 0,2662       | 0,4239    | 0,2642  | 0,4006                        | 0,4604 | 0,4365 | 0,3942 | 0,4241 | 0,3878 | 0,3356 | 0,5804  |
| Absorbance difference       | -0,1140 | 0,4637       | 0,2208    | 0,4737  | 0,4137                        | 0,2140 | 0,2426 | 0,3238 | 0,3548 | 0,3702 | 0,3608 | -0,0918 |
|                             | -0,1157 | 0,4808       | 0,1754    | 0,4884  | 0,2979                        | 0,1848 | 0,2091 | 0,3116 | 0,2669 | 0,3631 | 0,4086 | -0,0616 |
| % live cell                 |         | 98,54        | 57,17     | 100,25  | 90,03                         | 56,01  | 60,88  | 74,71  | 79,99  | 82,62  | 81,02  | 3,93    |
|                             |         | 101,46       | 49,44     | 102,75  | 70,30                         | 51,04  | 55,18  | 72,64  | 65,02  | 81,41  | 89,16  | 9,07    |
| Average % live cell         |         | 100,00       | 53,30     | 101,50  | 80,17                         | 53,53  | 58,03  | 73,68  | 72,51  | 82,01  | 85,09  | 6,50    |
| SEM                         |         | 1,46         | 3,87      | 1,25    | 9,86                          | 2,49   | 2,85   | 1,04   | 7,49   | 0,60   | 4,07   | 2,57    |
| Normalized data % live cell |         | 98,52        | 52,52     | 100,00  | 78,98                         | 52,74  | 57,17  | 72,59  | 71,44  | 80,80  | 83,83  | 6,40    |

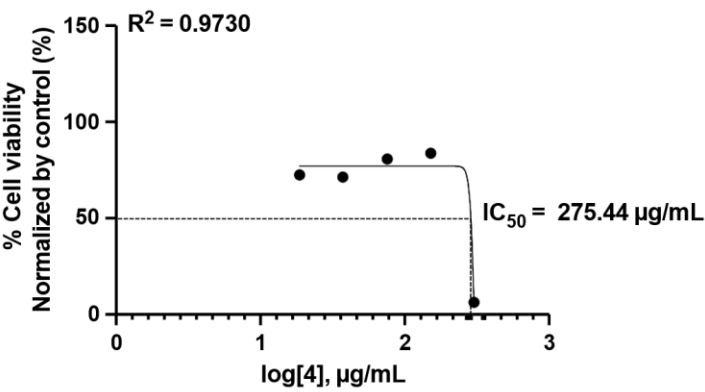

| Media                                                                                | Media +cell | Cisplatin | Solvent | Sample concentrations (µg/mL) |      |      |       |       |       |        |        |
|--------------------------------------------------------------------------------------|-------------|-----------|---------|-------------------------------|------|------|-------|-------|-------|--------|--------|
|                                                                                      |             |           |         | 2,34                          | 4,69 | 9,38 | 18,75 | 37,50 | 75,00 | 150,00 | 300,00 |
|  |             |           |         |                               |      |      |       |       |       |        |        |

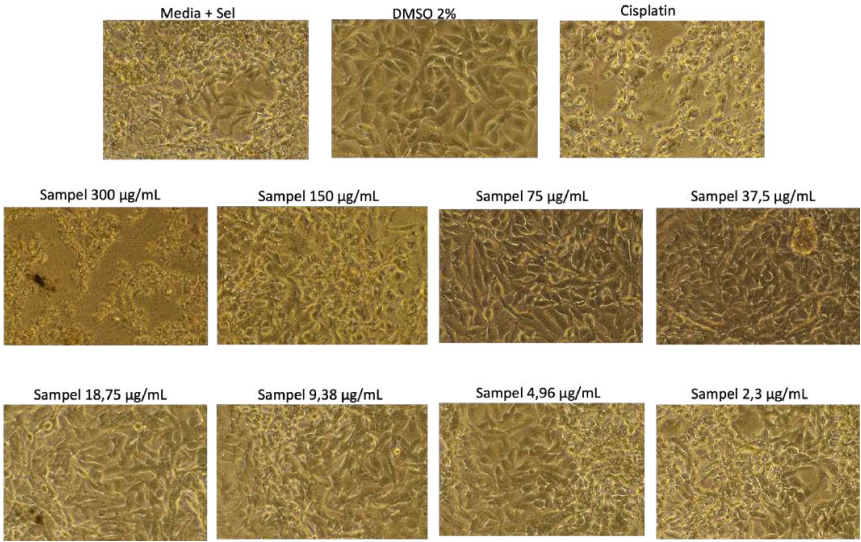

B16-F10 cell morphology at each concentration of compound **4**

**Figure S49.** Results of cytotoxic activity of **5** against B16-F10 cell line.

|                             | Media   | Media + cell | Cisplatin | Solvent | Sample concentrations (µg/mL) |        |        |        |        |         |         |         |
|-----------------------------|---------|--------------|-----------|---------|-------------------------------|--------|--------|--------|--------|---------|---------|---------|
|                             |         |              |           |         | 2,34                          | 4,69   | 9,38   | 18,75  | 37,50  | 75,00   | 150,00  | 300,00  |
| Absorbance 570nm            | 0,4525  | 0,7797       | 0,4912    | 0,7199  | 0,7613                        | 0,7580 | 0,7566 | 0,7478 | 0,6946 | 0,5090  | 0,4848  | 0,4863  |
|                             | 0,4987  | 0,7640       | 0,4970    | 0,7186  | 0,7608                        | 0,7664 | 0,7653 | 0,7614 | 0,6989 | 0,5149  | 0,4963  | 0,4848  |
| Absorbance 600nm            | 0,5775  | 0,2607       | 0,5922    | 0,3137  | 0,2741                        | 0,2910 | 0,2879 | 0,2816 | 0,3693 | 0,6003  | 0,6215  | 0,6162  |
|                             | 0,6378  | 0,2726       | 0,5976    | 0,3261  | 0,2911                        | 0,2927 | 0,2925 | 0,2987 | 0,3842 | 0,6199  | 0,6250  | 0,6166  |
| Absorbance difference       | -0,1250 | 0,5190       | -0,1010   | 0,4062  | 0,4872                        | 0,4670 | 0,4687 | 0,4662 | 0,3253 | -0,0913 | -0,1367 | -0,1299 |
|                             | -0,1391 | 0,4914       | -0,1006   | 0,3925  | 0,4697                        | 0,4737 | 0,4728 | 0,4627 | 0,3147 | -0,1050 | -0,1287 | -0,1318 |
| % live cell                 |         | 122,52       | 5,84      | 101,29  | 116,53                        | 112,73 | 113,05 | 112,58 | 86,07  | 7,67    | -0,88   | 0,40    |
|                             |         | 117,32       | 5,92      | 98,71   | 113,24                        | 113,99 | 113,82 | 111,92 | 84,07  | 5,09    | 0,63    | 0,05    |
| Average % live cell         |         | 119,92       | 5,88      | 100,00  | 114,89                        | 113,36 | 113,44 | 112,25 | 85,07  | 6,38    | -0,12   | 0,23    |
| SEM                         |         | 2,60         | 0,04      | 1,29    | 1,65                          | 0,63   | 0,39   | 0,33   | 1,00   | 1,29    | 0,75    | 0,18    |
| Normalized data % live cell |         | 119,92       | 5,88      | 100,00  | 114,89                        | 113,36 | 113,44 | 112,25 | 85,07  | 6,38    | -0,12   | 0,23    |

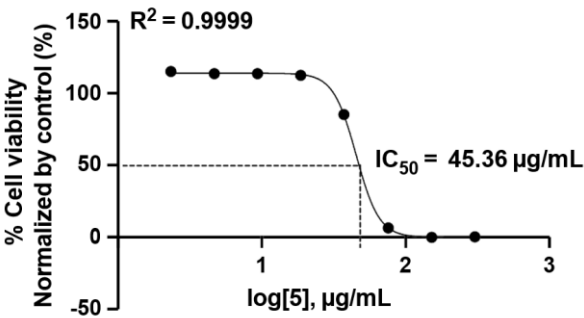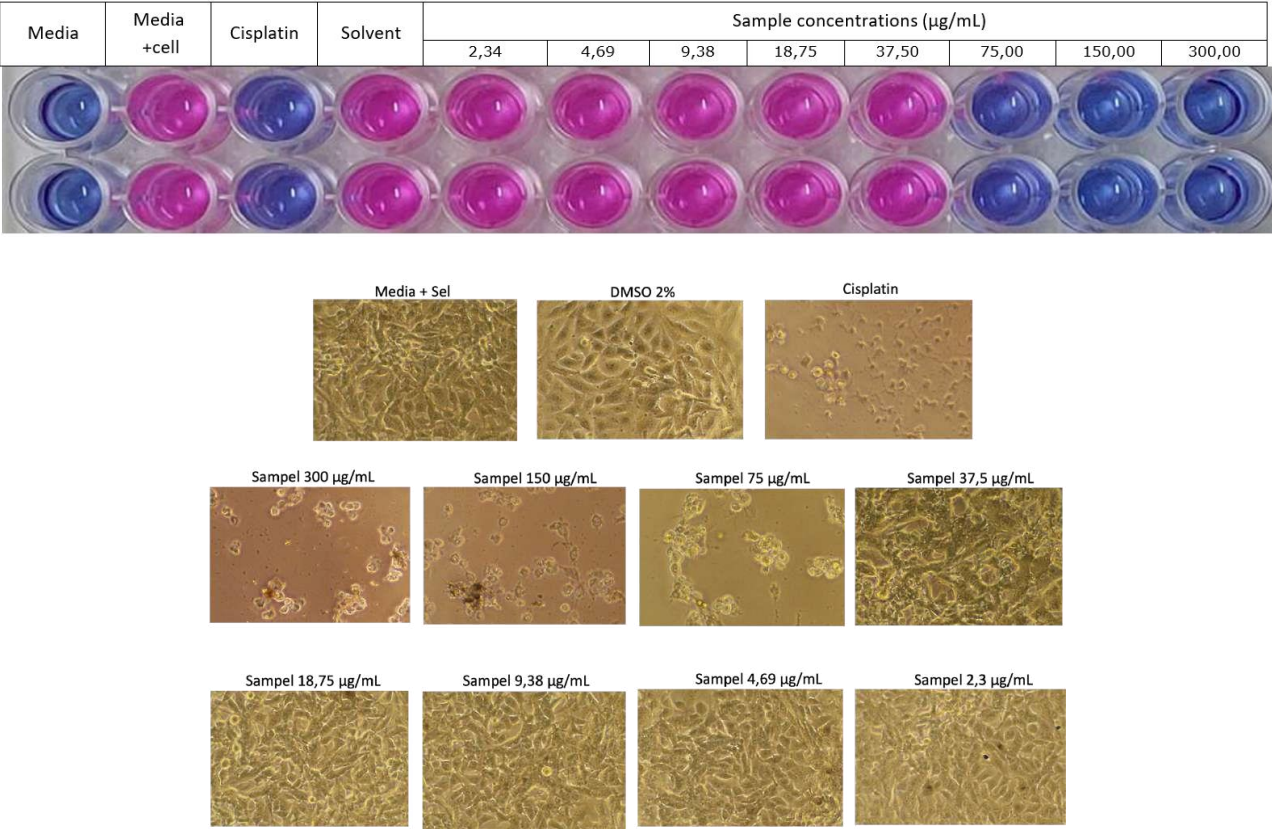

B16-F10 cell morphology at each concentration of compound **5**

**Figure S50.** Results of cytotoxic activity of **6** against B16-F10 cell line.

|                             | Media   | Media + cell | Cisplatin | Solvent | Sample concentrations (µg/mL) |        |        |        |        |        |        |         |
|-----------------------------|---------|--------------|-----------|---------|-------------------------------|--------|--------|--------|--------|--------|--------|---------|
|                             |         |              |           |         | 2,34                          | 4,69   | 9,38   | 18,75  | 37,50  | 75,00  | 150,00 | 300,00  |
| Absorbance 570nm            | 0,4927  | 0,7869       | 0,4960    | 0,7199  | 0,7273                        | 0,7219 | 0,7350 | 0,7306 | 0,6836 | 0,6445 | 0,5961 | 0,5731  |
|                             | 0,4921  | 0,7905       | 0,5134    | 0,7378  | 0,7850                        | 0,7901 | 0,7923 | 0,7715 | 0,7871 | 0,7280 | 0,6339 | 0,4870  |
| Absorbance 600nm            | 0,6282  | 0,2574       | 0,5898    | 0,3211  | 0,3149                        | 0,3237 | 0,3074 | 0,3286 | 0,3757 | 0,4500 | 0,5443 | 0,6970  |
|                             | 0,6261  | 0,2592       | 0,6123    | 0,3165  | 0,2735                        | 0,2776 | 0,2765 | 0,2697 | 0,3101 | 0,3754 | 0,4843 | 0,6138  |
| Absorbance difference       | -0,1355 | 0,5295       | -0,0938   | 0,3988  | 0,4124                        | 0,3982 | 0,4276 | 0,4020 | 0,3079 | 0,1945 | 0,0518 | -0,1239 |
|                             | -0,1340 | 0,5313       | -0,0989   | 0,4213  | 0,5115                        | 0,5125 | 0,5158 | 0,5018 | 0,4770 | 0,3526 | 0,1496 | -0,1268 |
| % live cell                 |         | 121,93       | 7,52      | 97,94   | 100,43                        | 97,82  | 103,22 | 98,52  | 81,25  | 60,44  | 34,24  | 1,99    |
|                             |         | 122,26       | 6,58      | 102,06  | 118,62                        | 118,81 | 119,41 | 116,84 | 112,29 | 89,45  | 52,19  | 1,46    |
| Average % live cell         |         | 122,09       | 7,05      | 100,00  | 109,53                        | 108,31 | 111,32 | 107,68 | 96,77  | 74,94  | 43,22  | 1,73    |
| SEM                         |         | 0,17         | 0,47      | 2,06    | 9,10                          | 10,49  | 8,09   | 9,16   | 15,52  | 14,51  | 8,98   | 0,27    |
| Normalized data % live cell |         | 122,09       | 7,05      | 100,00  | 109,53                        | 108,31 | 111,32 | 107,68 | 96,77  | 74,94  | 43,22  | 1,73    |

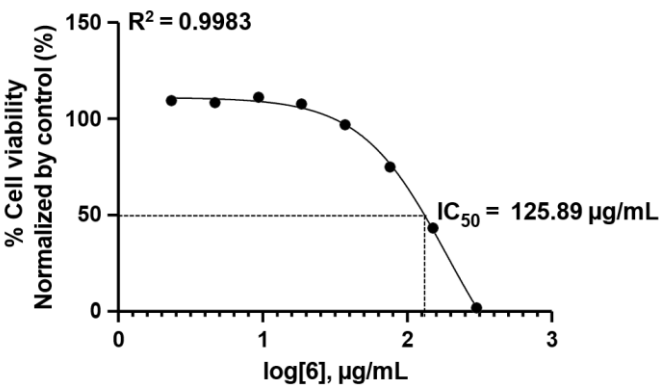

| Media                                                                                | Media +cell | Cisplatin | Solvent | Sample concentrations (µg/mL) |      |      |       |       |       |        |        |
|--------------------------------------------------------------------------------------|-------------|-----------|---------|-------------------------------|------|------|-------|-------|-------|--------|--------|
|                                                                                      |             |           |         | 2,34                          | 4,69 | 9,38 | 18,75 | 37,50 | 75,00 | 150,00 | 300,00 |
|  |             |           |         |                               |      |      |       |       |       |        |        |

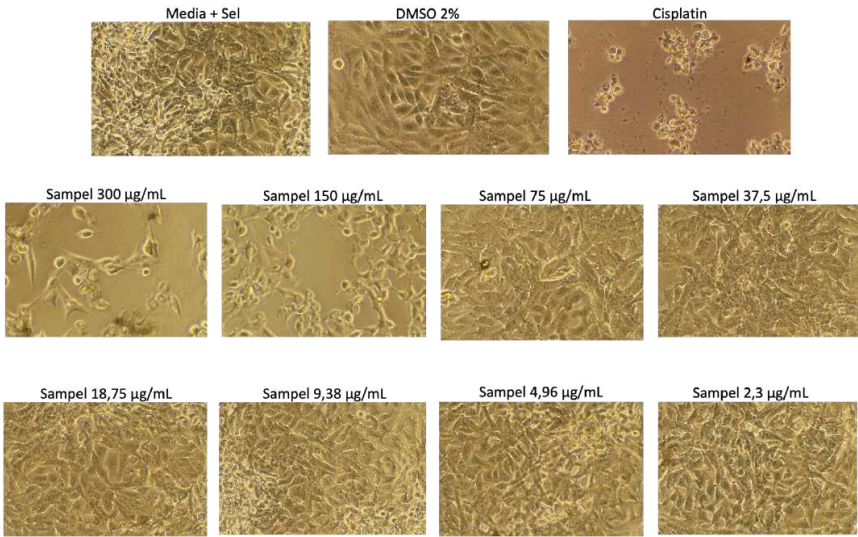

B16-F10 cell morphology at each concentration of compound **6**



**Figure S51.** Results of cytotoxic activity of **7** against B16-F10 cell line.

|                             | Media   | Media + cell | Cisplatin | Solvent | Sample concentrations (µg/mL) |        |        |        |        |        |        |         |
|-----------------------------|---------|--------------|-----------|---------|-------------------------------|--------|--------|--------|--------|--------|--------|---------|
|                             |         |              |           |         | 2,34                          | 4,69   | 9,38   | 18,75  | 37,50  | 75,00  | 150,00 | 300,00  |
| Absorbance 570nm            | 0,4836  | 0,7798       | 0,4930    | 0,7107  | 0,7595                        | 0,7377 | 0,7650 | 0,7577 | 0,7595 | 0,6684 | 0,5573 | 0,5005  |
|                             | 0,4968  | 0,7865       | 0,5016    | 0,7147  | 0,7555                        | 0,7494 | 0,7822 | 0,7613 | 0,7579 | 0,5643 | 0,5584 | 0,5098  |
| Absorbance 600nm            | 0,6183  | 0,2650       | 0,5895    | 0,3311  | 0,2952                        | 0,2814 | 0,2873 | 0,2813 | 0,2763 | 0,4048 | 0,5319 | 0,6177  |
|                             | 0,6344  | 0,2664       | 0,6046    | 0,3280  | 0,2906                        | 0,2926 | 0,2830 | 0,2713 | 0,2857 | 0,5586 | 0,5180 | 0,6308  |
| Absorbance difference       | -0,1347 | 0,5148       | -0,0965   | 0,3796  | 0,4643                        | 0,4563 | 0,4777 | 0,4764 | 0,4832 | 0,2636 | 0,0254 | -0,1172 |
|                             | -0,1376 | 0,5201       | -0,1030   | 0,3867  | 0,4649                        | 0,4568 | 0,4992 | 0,4900 | 0,4722 | 0,0057 | 0,0404 | -0,1210 |
| % live cell                 |         | 125,35       | 7,64      | 99,32   | 115,63                        | 114,09 | 118,21 | 117,96 | 119,27 | 76,98  | 31,11  | 3,65    |
|                             |         | 126,37       | 6,38      | 100,68  | 115,74                        | 114,18 | 122,35 | 120,58 | 117,15 | 27,32  | 34,00  | 2,92    |
| Average % live cell         |         | 125,86       | 7,01      | 100,00  | 115,68                        | 114,13 | 120,28 | 119,27 | 118,21 | 52,15  | 32,55  | 3,28    |
| SEM                         |         | 0,51         | 0,63      | 0,68    | 0,06                          | 0,05   | 2,07   | 1,31   | 1,06   | 24,83  | 1,44   | 0,37    |
| Normalized data % live cell |         | 125,86       | 7,01      | 100,00  | 115,68                        | 114,13 | 120,28 | 119,27 | 118,21 | 52,15  | 32,55  | 3,28    |

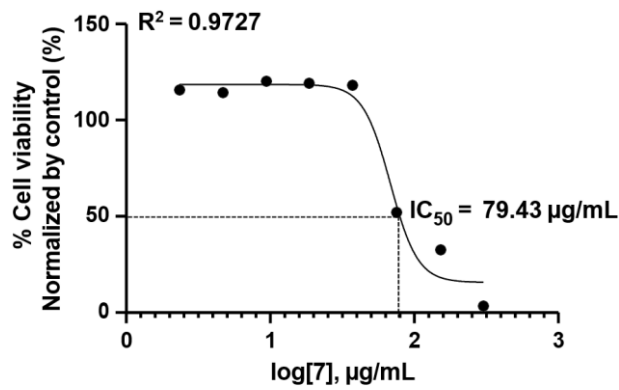

| Media                                                                                | Media +cell | Cisplatin | Solvent | Sample concentrations (µg/mL) |      |      |       |       |       |        |        |
|--------------------------------------------------------------------------------------|-------------|-----------|---------|-------------------------------|------|------|-------|-------|-------|--------|--------|
|                                                                                      |             |           |         | 2,34                          | 4,69 | 9,38 | 18,75 | 37,50 | 75,00 | 150,00 | 300,00 |
|  |             |           |         |                               |      |      |       |       |       |        |        |

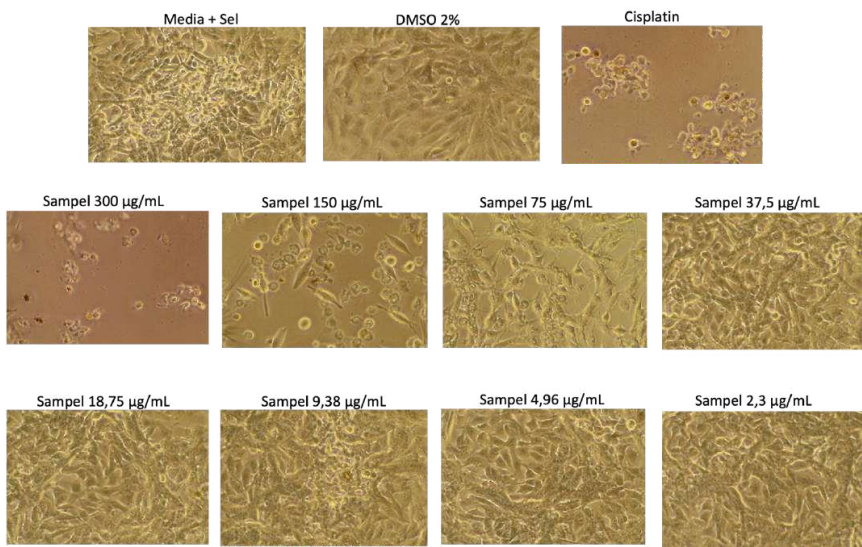

B16-F10 cell morphology at each concentration of compound **7**

**Figure S52.** Results of cytotoxic activity of **1** against CV-1 cell line.

|                             | Media  | Media + cell | Cisplatin | Solvent | Sample concentrations (µg/mL) |        |        |        |        |        |        |        |
|-----------------------------|--------|--------------|-----------|---------|-------------------------------|--------|--------|--------|--------|--------|--------|--------|
|                             |        |              |           |         | 2,34                          | 4,69   | 9,38   | 18,75  | 37,50  | 75,00  | 150,00 | 300,00 |
| Absorbance 570nm            | 0,5356 | 0,7346       | 0,6104    | 0,7829  | 0,7258                        | 0,7339 | 0,7347 | 0,7302 | 0,7241 | 0,6270 | 0,5508 | 0,4946 |
|                             | 0,5339 | 0,7388       | 0,6105    | 0,7838  | 0,7183                        | 0,7412 | 0,7442 | 0,7478 | 0,7443 | 0,6362 | 0,5726 | 0,5070 |
| Absorbance 600nm            | 0,5267 | 0,2567       | 0,4439    | 0,2193  | 0,2540                        | 0,2521 | 0,2490 | 0,2560 | 0,2727 | 0,3454 | 0,4778 | 0,4896 |
|                             | 0,5317 | 0,2659       | 0,4321    | 0,2397  | 0,2553                        | 0,2682 | 0,2621 | 0,2627 | 0,2914 | 0,3642 | 0,5062 | 0,5053 |
| Absorbance difference       | 0,0089 | 0,4779       | 0,1665    | 0,5636  | 0,4718                        | 0,4818 | 0,4857 | 0,4742 | 0,4514 | 0,2816 | 0,0730 | 0,0050 |
|                             | 0,0022 | 0,4729       | 0,1784    | 0,5441  | 0,4630                        | 0,4730 | 0,4821 | 0,4851 | 0,4529 | 0,2720 | 0,0664 | 0,0017 |
| % live cell                 |        | 100,53       | 34,26     | 118,77  | 99,23                         | 101,36 | 102,19 | 99,74  | 94,89  | 58,75  | 14,36  | -0,12  |
|                             |        | 99,47        | 36,79     | 114,62  | 97,36                         | 99,49  | 101,43 | 102,06 | 95,21  | 56,71  | 12,95  | -0,82  |
| Average % live cell         |        | 100,00       | 35,52     | 116,70  | 98,30                         | 100,43 | 101,81 | 100,90 | 95,05  | 57,73  | 13,65  | -0,47  |
| SEM                         |        | 0,53         | 1,27      | 2,08    | 0,94                          | 0,94   | 0,38   | 1,16   | 0,16   | 1,02   | 0,70   | 0,35   |
| Normalized data % live cell |        | 85,69        | 30,44     | 100,00  | 84,23                         | 86,06  | 87,24  | 86,47  | 81,45  | 49,47  | 11,70  | -0,40  |

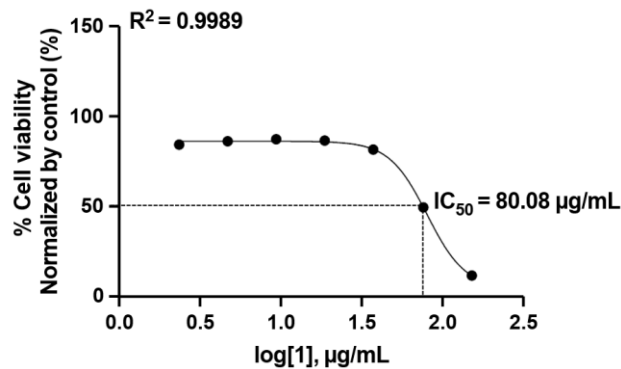

| Media | Media +cell | Cisplatin | Solvent | Sample concentrations (µg/mL) |      |      |       |       |       |        |        |
|-------|-------------|-----------|---------|-------------------------------|------|------|-------|-------|-------|--------|--------|
|       |             |           |         | 2,34                          | 4,69 | 9,38 | 18,75 | 37,50 | 75,00 | 150,00 | 300,00 |
|       |             |           |         |                               |      |      |       |       |       |        |        |

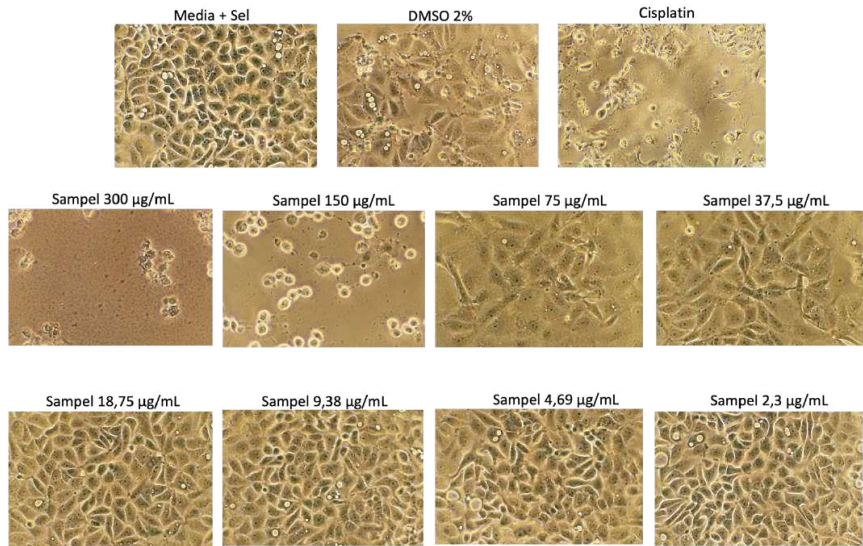

CV-1 cell morphology at each concentration of compound **1**

**Figure S53.** Results of cytotoxic activity of **2** against CV-1 cell line.

|                             | Media   | Media + cell | Cisplatin | Solvent | Sample concentrations (µg/mL) |        |        |        |        |        |         |         |
|-----------------------------|---------|--------------|-----------|---------|-------------------------------|--------|--------|--------|--------|--------|---------|---------|
|                             |         |              |           |         | 2,34                          | 4,69   | 9,38   | 18,75  | 37,50  | 75,00  | 150,00  | 300,00  |
| Absorbance 570nm            | 0,4518  | 0,6048       | 0,5419    | 0,6064  | 0,6056                        | 0,6122 | 0,6213 | 0,6346 | 0,6249 | 0,5790 | 0,5091  | 0,4896  |
|                             | 0,4546  | 0,6030       | 0,5455    | 0,5857  | 0,6074                        | 0,6298 | 0,6354 | 0,6355 | 0,6201 | 0,5713 | 0,5182  | 0,4913  |
| Absorbance 600nm            | 0,5738  | 0,4401       | 0,5407    | 0,4647  | 0,4472                        | 0,4425 | 0,4408 | 0,4207 | 0,4383 | 0,4932 | 0,6266  | 0,6122  |
|                             | 0,5792  | 0,4398       | 0,5475    | 0,4841  | 0,4556                        | 0,4636 | 0,4503 | 0,4315 | 0,4484 | 0,5141 | 0,6375  | 0,6175  |
| Absorbance difference       | -0,1220 | 0,1647       | 0,0012    | 0,1417  | 0,1584                        | 0,1697 | 0,1805 | 0,2139 | 0,1866 | 0,0858 | -0,1175 | -0,1226 |
|                             | -0,1246 | 0,1632       | -0,0020   | 0,1016  | 0,1518                        | 0,1662 | 0,1851 | 0,2040 | 0,1717 | 0,0572 | -0,1193 | -0,1262 |
| % live cell                 |         | 117,58       | 50,83     | 108,19  | 115,00                        | 119,62 | 124,03 | 137,66 | 126,52 | 85,36  | 2,37    | 0,29    |
|                             |         | 116,96       | 49,52     | 91,81   | 112,31                        | 118,19 | 125,90 | 133,62 | 120,43 | 73,69  | 1,63    | -1,18   |
| Average % live cell         |         | 117,27       | 50,17     | 100,00  | 113,66                        | 118,90 | 124,96 | 135,64 | 123,47 | 79,53  | 2,00    | -0,45   |
| SEM                         |         | 0,31         | 0,65      | 8,19    | 1,35                          | 0,71   | 0,94   | 2,02   | 3,04   | 5,84   | 0,37    | 0,73    |
| Normalized data % live cell |         | 117,27       | 50,17     | 100,00  | 113,66                        | 118,90 | 124,96 | 135,64 | 123,47 | 79,53  | 2,00    | -0,45   |

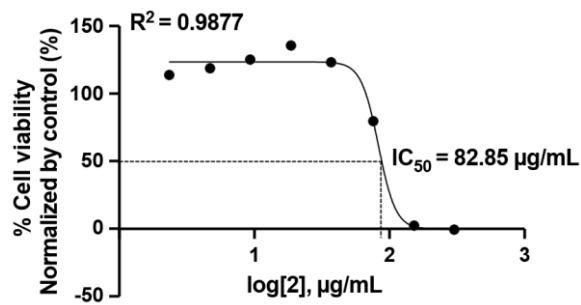

| Media                                                                                | Media +cell | Cisplatin | Solvent | Sample concentrations (µg/mL) |      |      |       |       |       |        |        |
|--------------------------------------------------------------------------------------|-------------|-----------|---------|-------------------------------|------|------|-------|-------|-------|--------|--------|
|                                                                                      |             |           |         | 2,34                          | 4,69 | 9,38 | 18,75 | 37,50 | 75,00 | 150,00 | 300,00 |
|  |             |           |         |                               |      |      |       |       |       |        |        |

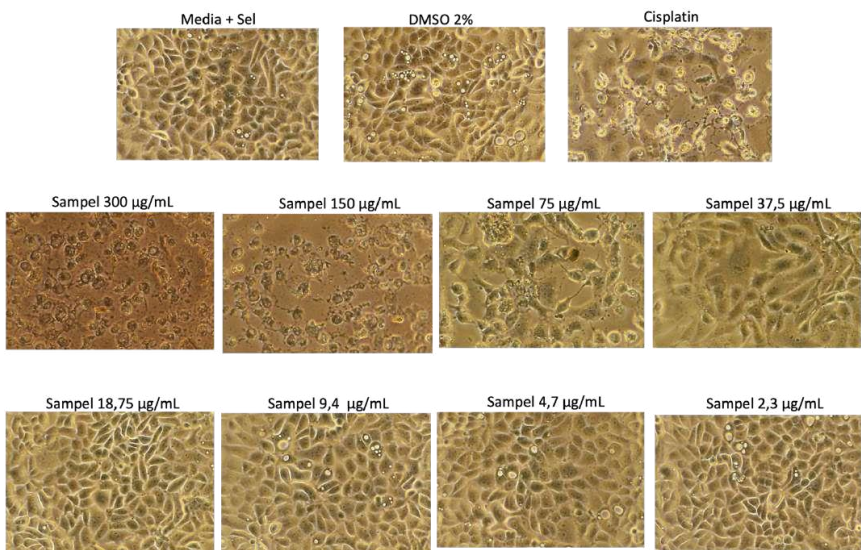

CV-1 cell morphology at each concentration of compound **2**



**Figure S54.** Results of cytotoxic activity of **3** against CV-1 cell line.

|                             | Media   | Media + cell | Cisplatin | Solvent | Sample concentrations (µg/mL) |        |        |        |        |        |        |        |
|-----------------------------|---------|--------------|-----------|---------|-------------------------------|--------|--------|--------|--------|--------|--------|--------|
|                             |         |              |           |         | 2,34                          | 4,69   | 9,38   | 18,75  | 37,50  | 75,00  | 150,00 | 300,00 |
| Absorbance 570nm            | 0,4165  | 0,6597       | 0,5592    | 0,6652  | 0,6441                        | 0,6231 | 0,6520 | 0,6504 | 0,6416 | 0,6214 | 0,6311 | 0,6229 |
|                             | 0,4796  | 0,6565       | 0,4082    | 0,6498  | 0,6503                        | 0,6287 | 0,7295 | 0,6420 | 0,6444 | 0,6658 | 0,6517 | 0,6498 |
| Absorbance 600nm            | 0,5388  | 0,3514       | 0,4926    | 0,3588  | 0,3832                        | 0,3702 | 0,3580 | 0,3722 | 0,3713 | 0,3975 | 0,4297 | 0,5089 |
|                             | 0,6217  | 0,3466       | 0,3182    | 0,3662  | 0,3656                        | 0,3496 | 0,4347 | 0,3904 | 0,3743 | 0,3769 | 0,4040 | 0,4508 |
| Absorbance difference       | -0,1223 | 0,3083       | 0,0666    | 0,3064  | 0,2609                        | 0,2529 | 0,2940 | 0,2782 | 0,2703 | 0,2239 | 0,2014 | 0,1140 |
|                             | -0,1421 | 0,3099       | 0,0900    | 0,2836  | 0,2847                        | 0,2791 | 0,2948 | 0,2516 | 0,2701 | 0,2889 | 0,2477 | 0,1990 |
| % live cell                 |         | 103,11       | 46,54     | 102,67  | 92,02                         | 90,15  | 99,77  | 96,07  | 94,22  | 83,36  | 78,09  | 57,63  |
|                             |         | 103,49       | 52,01     | 97,33   | 97,59                         | 96,28  | 99,95  | 89,84  | 94,17  | 98,57  | 88,93  | 77,53  |
| Average % live cell SEM     |         | 103,30       | 49,27     | 100,00  | 94,80                         | 93,21  | 99,86  | 92,95  | 94,19  | 90,96  | 83,51  | 67,58  |
|                             |         | 0,19         | 2,74      | 2,67    | 2,79                          | 3,07   | 0,09   | 3,11   | 0,02   | 7,61   | 5,42   | 9,95   |
| Normalized data % live cell |         | 103,30       | 49,27     | 100,00  | 94,80                         | 93,21  | 99,86  | 92,95  | 94,19  | 90,96  | 83,51  | 67,58  |

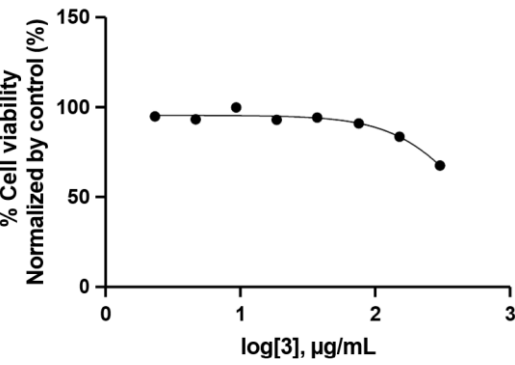

| Media                                                                                | Media +cell | Cisplatin | Solvent | Sample concentrations (µg/mL) |      |      |       |       |       |        |        |
|--------------------------------------------------------------------------------------|-------------|-----------|---------|-------------------------------|------|------|-------|-------|-------|--------|--------|
|                                                                                      |             |           |         | 2,34                          | 4,69 | 9,38 | 18,75 | 37,50 | 75,00 | 150,00 | 300,00 |
|  |             |           |         |                               |      |      |       |       |       |        |        |

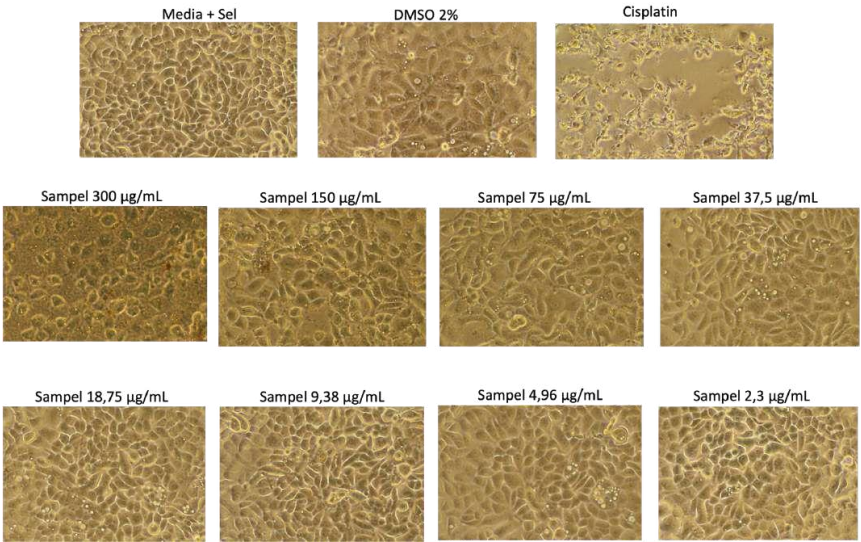

CV-1 cell morphology at each concentration of compound **3**

**Figure S55.** Results of cytotoxic activity of **4** against CV-1 cell line.

|                             | Media   | Media + cell | Cisplatin | Solvent | Sample concentrations (µg/mL) |        |        |        |        |        |         |         |
|-----------------------------|---------|--------------|-----------|---------|-------------------------------|--------|--------|--------|--------|--------|---------|---------|
|                             |         |              |           |         | 2,34                          | 4,69   | 9,38   | 18,75  | 37,50  | 75,00  | 150,00  | 300,00  |
| Absorbance 570nm            | 0,4640  | 0,6657       | 0,5603    | 0,6378  | 0,6427                        | 0,6352 | 0,6466 | 0,6474 | 0,6526 | 0,6323 | 0,5216  | 0,5649  |
|                             | 0,4727  | 0,6893       | 0,5760    | 0,6586  | 0,6534                        | 0,6664 | 0,6475 | 0,6099 | 0,6818 | 0,6544 | 0,5656  | 0,4729  |
| Absorbance 600nm            | 0,6025  | 0,3511       | 0,4973    | 0,3726  | 0,3847                        | 0,3705 | 0,3526 | 0,3531 | 0,3805 | 0,3779 | 0,5391  | 0,7128  |
|                             | 0,6115  | 0,3249       | 0,5070    | 0,3652  | 0,3608                        | 0,3480 | 0,3687 | 0,3207 | 0,3496 | 0,4067 | 0,5019  | 0,5969  |
| Absorbance difference       | -0,1385 | 0,3146       | 0,0630    | 0,2652  | 0,2580                        | 0,2647 | 0,2940 | 0,2943 | 0,2721 | 0,2544 | -0,0175 | -0,1479 |
|                             | -0,1388 | 0,3644       | 0,0690    | 0,2934  | 0,2926                        | 0,3184 | 0,2788 | 0,2892 | 0,3322 | 0,2477 | 0,0637  | -0,1240 |
| % live cell                 |         | 108,45       | 48,25     | 96,63   | 94,90                         | 96,51  | 103,52 | 103,59 | 98,28  | 94,04  | 28,99   | -2,21   |
|                             |         | 120,36       | 49,68     | 103,37  | 103,18                        | 109,36 | 99,88  | 102,37 | 112,66 | 92,44  | 48,41   | 3,51    |
| Average % live cell         |         | 114,40       | 48,97     | 100,00  | 99,04                         | 102,93 | 101,70 | 102,98 | 105,47 | 93,24  | 38,70   | 0,65    |
| SEM                         |         | 5,96         | 0,72      | 3,37    | 4,14                          | 6,42   | 1,82   | 0,61   | 7,19   | 0,80   | 9,71    | 2,86    |
| Normalized data % live cell |         | 114,40       | 48,97     | 100,00  | 99,04                         | 102,93 | 101,70 | 102,98 | 105,47 | 93,24  | 38,70   | 0,65    |

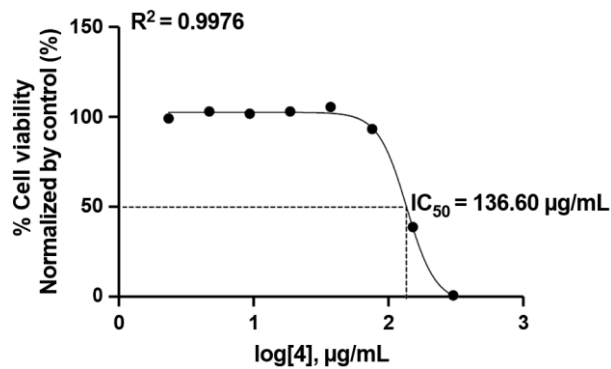

| Media                                                                                | Media +cell | Cisplatin | Solvent | Sample concentrations (µg/mL) |      |      |       |       |       |        |        |
|--------------------------------------------------------------------------------------|-------------|-----------|---------|-------------------------------|------|------|-------|-------|-------|--------|--------|
|                                                                                      |             |           |         | 2,34                          | 4,69 | 9,38 | 18,75 | 37,50 | 75,00 | 150,00 | 300,00 |
|  |             |           |         |                               |      |      |       |       |       |        |        |

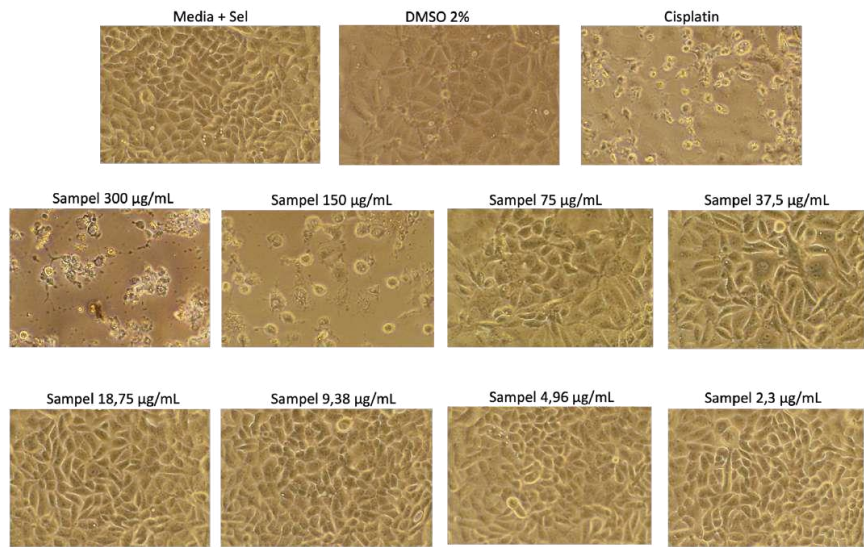

CV-1 cell morphology at each concentration of compound **4**

**Figure S56.** Results of cytotoxic activity of **5** against CV-1 cell line.

|                             | Media   | Media + cell | Cisplatin | Solvent | Sample concentrations (µg/mL) |        |        |        |        |        |        |        |
|-----------------------------|---------|--------------|-----------|---------|-------------------------------|--------|--------|--------|--------|--------|--------|--------|
|                             |         |              |           |         | 2,34                          | 4,69   | 9,38   | 18,75  | 37,50  | 75,00  | 150,00 | 300,00 |
| Absorbance 570nm            | 0,4687  | 0,6433       | 0,5625    | 0,6487  | 0,6356                        | 0,6404 | 0,6260 | 0,6342 | 0,6365 | 0,6495 | 0,6546 | 0,6657 |
|                             | 0,4708  | 0,6554       | 0,5644    | 0,6482  | 0,6192                        | 0,6210 | 0,6440 | 0,6267 | 0,6308 | 0,6475 | 0,6577 | 0,6626 |
| Absorbance 600nm            | 0,6093  | 0,3598       | 0,5112    | 0,3601  | 0,3625                        | 0,3558 | 0,3648 | 0,3510 | 0,3416 | 0,3308 | 0,3360 | 0,3254 |
|                             | 0,6111  | 0,3561       | 0,5117    | 0,3670  | 0,3697                        | 0,3756 | 0,3544 | 0,3410 | 0,3660 | 0,3619 | 0,3469 | 0,3298 |
| Absorbance difference       | -0,1406 | 0,2835       | 0,0513    | 0,2886  | 0,2731                        | 0,2846 | 0,2612 | 0,2832 | 0,2949 | 0,3187 | 0,3186 | 0,3403 |
|                             | -0,1403 | 0,2993       | 0,0527    | 0,2812  | 0,2495                        | 0,2454 | 0,2896 | 0,2857 | 0,2648 | 0,2856 | 0,3108 | 0,3328 |
| % live cell                 |         | 99,67        | 45,08     | 100,87  | 97,23                         | 99,93  | 94,43  | 99,60  | 102,35 | 107,95 | 107,92 | 113,02 |
|                             |         | 103,39       | 45,41     | 99,13   | 91,68                         | 90,71  | 101,10 | 100,19 | 95,27  | 100,16 | 106,09 | 111,26 |
| Average % live cell         |         | 101,53       | 45,25     | 100,00  | 94,45                         | 95,32  | 97,77  | 99,89  | 98,81  | 104,06 | 107,01 | 112,14 |
| SEM                         |         | 1,86         | 0,16      | 0,87    | 2,77                          | 4,61   | 3,34   | 0,29   | 3,54   | 3,89   | 0,92   | 0,88   |
| Normalized data % live cell |         | 101,53       | 45,25     | 100,00  | 94,45                         | 95,32  | 97,77  | 99,89  | 98,81  | 104,06 | 107,01 | 112,14 |

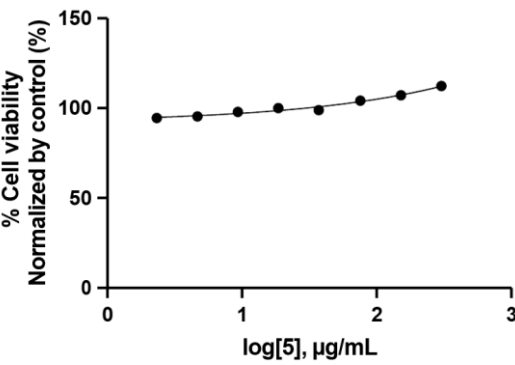

| Media                                                                                | Media +cell | Cisplatin | Solvent | Sample concentrations (µg/mL) |      |      |       |       |       |        |        |
|--------------------------------------------------------------------------------------|-------------|-----------|---------|-------------------------------|------|------|-------|-------|-------|--------|--------|
|                                                                                      |             |           |         | 2,34                          | 4,69 | 9,38 | 18,75 | 37,50 | 75,00 | 150,00 | 300,00 |
|  |             |           |         |                               |      |      |       |       |       |        |        |

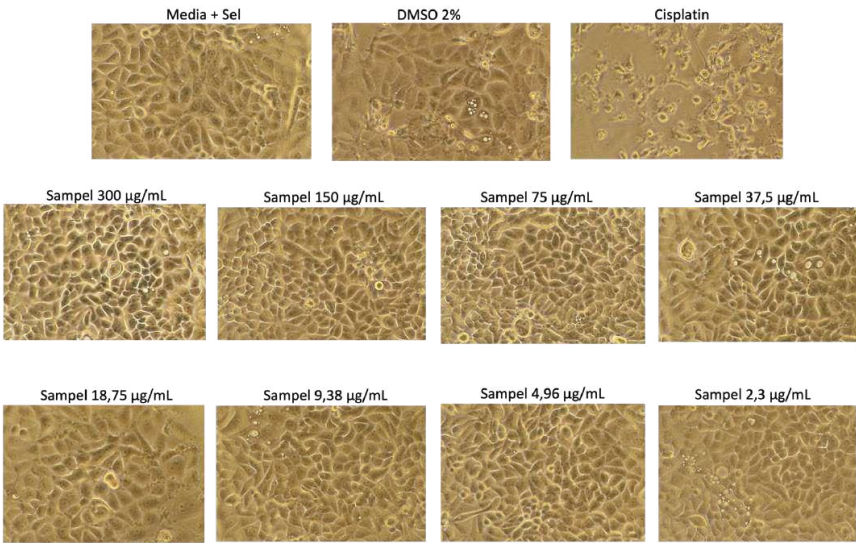

CV-1 cell morphology at each concentration of compound **5**



**Figure S57.** Results of cytotoxic activity of **6** against CV-1 cell line.

|                             | Media  | Media + cell | Cisplatin | Solvent | Sample concentrations (µg/mL) |        |        |        |        |        |        |        |
|-----------------------------|--------|--------------|-----------|---------|-------------------------------|--------|--------|--------|--------|--------|--------|--------|
|                             |        |              |           |         | 2,34                          | 4,69   | 9,38   | 18,75  | 37,50  | 75,00  | 150,00 | 300,00 |
| Absorbance 570nm            | 0,5265 | 0,7176       | 0,6352    | 0,7629  | 0,7335                        | 0,7533 | 0,7533 | 0,7493 | 0,7956 | 0,6623 | 0,6026 | 0,5243 |
|                             | 0,5327 | 0,7246       | 0,6209    | 0,7721  | 0,7248                        | 0,7415 | 0,7439 | 0,7256 | 0,7917 | 0,7524 | 0,6552 | 0,5266 |
| Absorbance 600nm            | 0,5257 | 0,2722       | 0,4256    | 0,2385  | 0,2696                        | 0,2757 | 0,2699 | 0,2697 | 0,2211 | 0,3672 | 0,4578 | 0,5227 |
|                             | 0,5322 | 0,2699       | 0,4184    | 0,2511  | 0,2693                        | 0,2728 | 0,2685 | 0,2560 | 0,2214 | 0,3031 | 0,4340 | 0,5217 |
| Absorbance difference       | 0,0008 | 0,4454       | 0,2096    | 0,5244  | 0,4639                        | 0,4776 | 0,4834 | 0,4796 | 0,5745 | 0,2951 | 0,1448 | 0,0016 |
|                             | 0,0005 | 0,4547       | 0,2025    | 0,5210  | 0,4555                        | 0,4687 | 0,4754 | 0,4696 | 0,5703 | 0,4493 | 0,2212 | 0,0049 |
| % live cell                 |        | 98,97        | 46,50     | 116,54  | 103,08                        | 106,13 | 107,42 | 106,58 | 127,69 | 65,52  | 32,08  | 0,21   |
|                             |        | 101,03       | 44,92     | 115,79  | 101,21                        | 104,15 | 105,64 | 104,35 | 126,76 | 99,83  | 49,08  | 0,95   |
| Average % live cell         |        | 100,00       | 45,71     | 116,17  | 102,15                        | 105,14 | 106,53 | 105,46 | 127,23 | 82,68  | 40,58  | 0,58   |
| SEM                         |        | 1,03         | 0,79      | 0,38    | 0,93                          | 0,99   | 0,89   | 1,11   | 0,47   | 17,16  | 8,50   | 0,37   |
| Normalized data % live cell |        | 86,08        | 39,34     | 100,00  | 87,93                         | 90,51  | 91,71  | 90,79  | 109,52 | 71,17  | 34,93  | 0,50   |

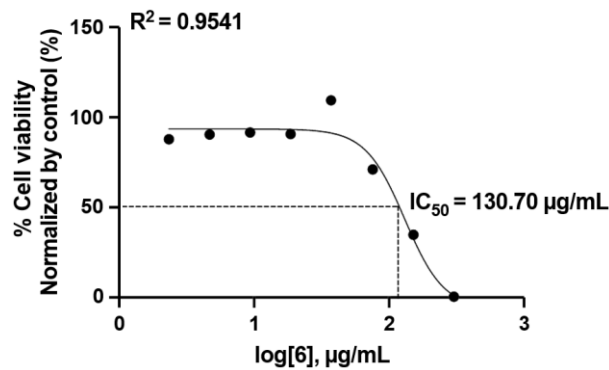

| Media                                                                                | Media +cell | Cisplatin | Solvent | Sample concentrations (µg/mL) |      |      |       |       |       |        |        |
|--------------------------------------------------------------------------------------|-------------|-----------|---------|-------------------------------|------|------|-------|-------|-------|--------|--------|
|                                                                                      |             |           |         | 2,34                          | 4,69 | 9,38 | 18,75 | 37,50 | 75,00 | 150,00 | 300,00 |
|  |             |           |         |                               |      |      |       |       |       |        |        |

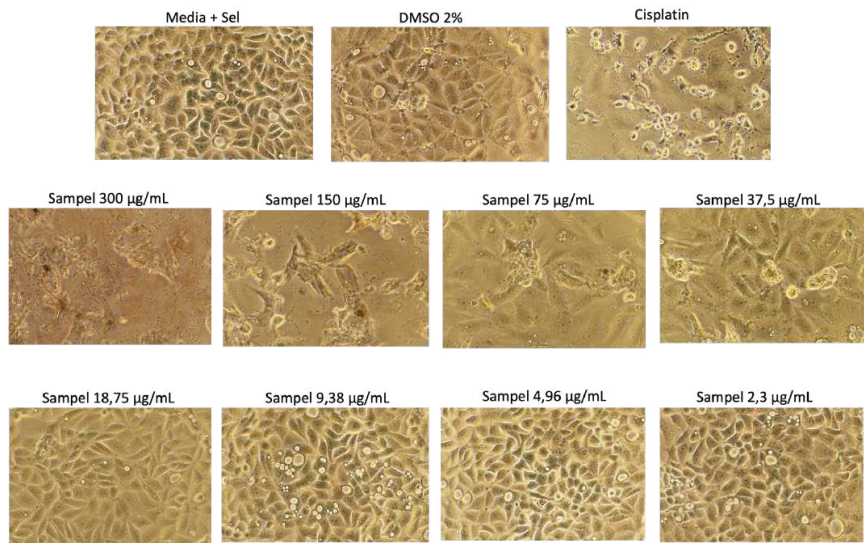

CV-1 cell morphology at each concentration of compound **6**

**Figure S58.** Results of cytotoxic activity of **7** against CV-1 cell line.

|                             | Media   | Media + cell | Cisplatin | Solvent | Sample concentrations (µg/mL) |        |        |        |        |        |        |        |
|-----------------------------|---------|--------------|-----------|---------|-------------------------------|--------|--------|--------|--------|--------|--------|--------|
|                             |         |              |           |         | 2,34                          | 4,69   | 9,38   | 18,75  | 37,50  | 75,00  | 150,00 | 300,00 |
| Absorbance 570nm            | 0,5242  | 0,6329       | 0,5616    | 0,6183  | 0,6212                        | 0,6140 | 0,6131 | 0,6115 | 0,6205 | 0,6185 | 0,6231 | 0,6225 |
|                             | 0,4539  | 0,6153       | 0,5522    | 0,6095  | 0,6111                        | 0,6084 | 0,6150 | 0,6161 | 0,6215 | 0,6760 | 0,6400 | 0,6143 |
| Absorbance 600nm            | 0,6704  | 0,4350       | 0,5451    | 0,4271  | 0,4531                        | 0,4413 | 0,4347 | 0,4414 | 0,4373 | 0,4385 | 0,4509 | 0,4594 |
|                             | 0,5781  | 0,4504       | 0,5541    | 0,4498  | 0,4549                        | 0,4511 | 0,4572 | 0,4523 | 0,4644 | 0,4833 | 0,4874 | 0,4562 |
| Absorbance difference       | -0,1462 | 0,1979       | 0,0165    | 0,1912  | 0,1681                        | 0,1727 | 0,1784 | 0,1701 | 0,1832 | 0,1800 | 0,1722 | 0,1631 |
|                             | -0,1242 | 0,1649       | -0,0019   | 0,1597  | 0,1562                        | 0,1573 | 0,1578 | 0,1638 | 0,1571 | 0,1927 | 0,1526 | 0,1581 |
| % live cell                 |         | 107,23       | 48,83     | 105,07  | 97,63                         | 99,11  | 100,95 | 98,28  | 102,49 | 101,46 | 98,95  | 96,02  |
|                             |         | 96,60        | 42,91     | 94,93   | 93,80                         | 94,16  | 94,32  | 96,25  | 94,09  | 105,55 | 92,64  | 94,41  |
| Average % live cell         |         | 101,92       | 45,87     | 100,00  | 95,72                         | 96,64  | 97,63  | 97,26  | 98,29  | 103,51 | 95,80  | 95,22  |
| SEM                         |         | 5,31         | 2,96      | 5,07    | 1,92                          | 2,48   | 3,32   | 1,01   | 4,20   | 2,04   | 3,15   | 0,80   |
| Normalized data % live cell |         | 101,92       | 45,87     | 100,00  | 95,72                         | 96,64  | 97,63  | 97,26  | 98,29  | 103,51 | 95,80  | 95,22  |

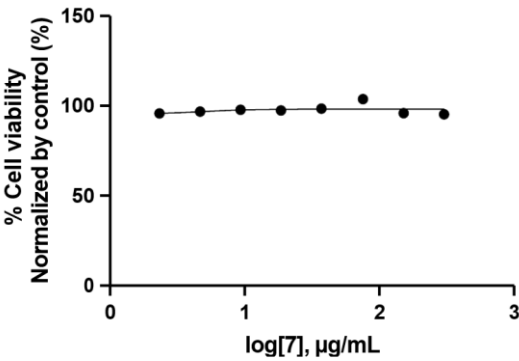

| Media                                                                                | Media +cell | Cisplatin | Solvent | Sample concentrations (µg/mL) |      |      |       |       |       |        |        |
|--------------------------------------------------------------------------------------|-------------|-----------|---------|-------------------------------|------|------|-------|-------|-------|--------|--------|
|                                                                                      |             |           |         | 2,34                          | 4,69 | 9,38 | 18,75 | 37,50 | 75,00 | 150,00 | 300,00 |
|  |             |           |         |                               |      |      |       |       |       |        |        |

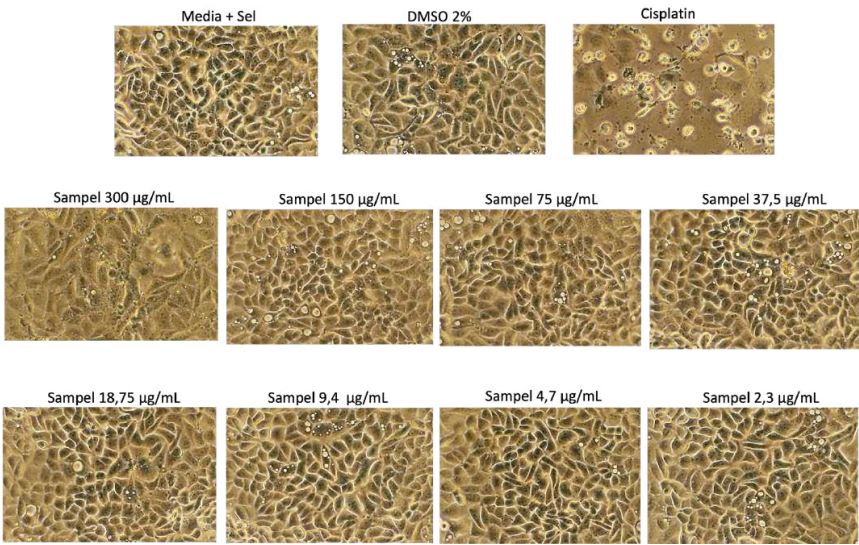

CV-1 cell morphology at each concentration of compound **7**

**Figure S59.** TLC profile of compounds **1-7**.

After sprayed with  
 $\text{H}_2\text{SO}_4$  in EtOH  
followed by heating

Under UV 365 nm

Under UV 254 nm

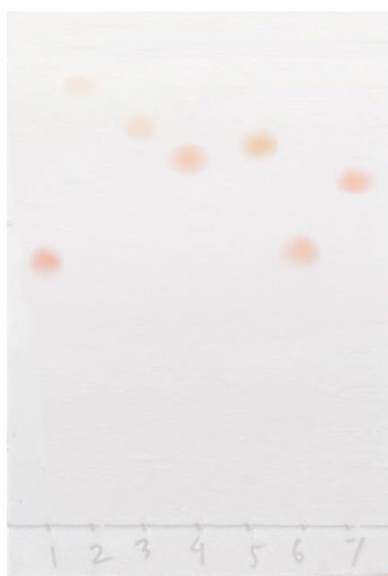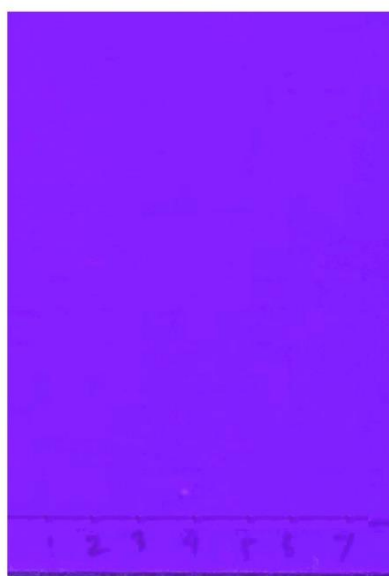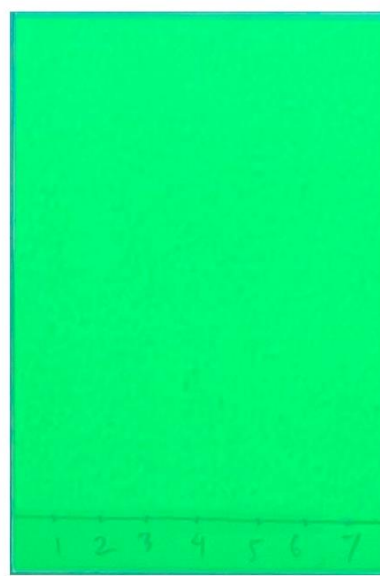

Supplement: s1 [file s1]
